# Supplementary material for: Mechanochemical Synthesis and Physicochemical Characterization of Previously Unreported Praziquantel Solvates with 2-Pyrrolidone and Acetic Acid
Source: MDPI journal article supplement (doi:10.3390/pharmaceutics13101606), 2021-10-02
Supplement: s1 [file s1]

# Supplementary Materials: Mechanochemical Synthesis and Physicochemical Characterization of Previously Unreported Praziquantel Solvates with 2-Pyrrolidone and Acetic Acid

Debora Zanolla, Lara Gigli, Dritan Hasa, Michele Remo Chierotti, Mihails Arhangeliskis, Nicola Demitri, William Jones, Dario Voinovich and Beatrice Perissutti

## Supplementary information

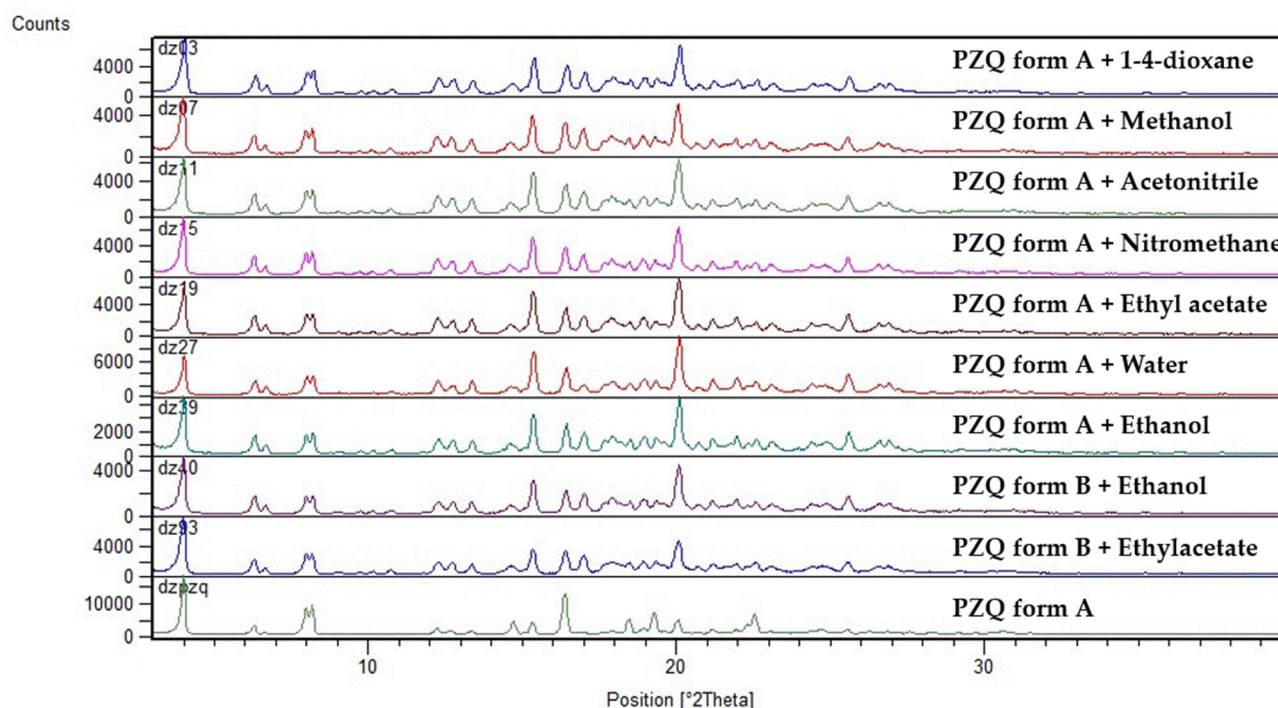

**Figure S1.** PXRD pattern of the solids retrieved after grinding PZQ A and B in presence of different liquid additives and PZQ A as a reference.

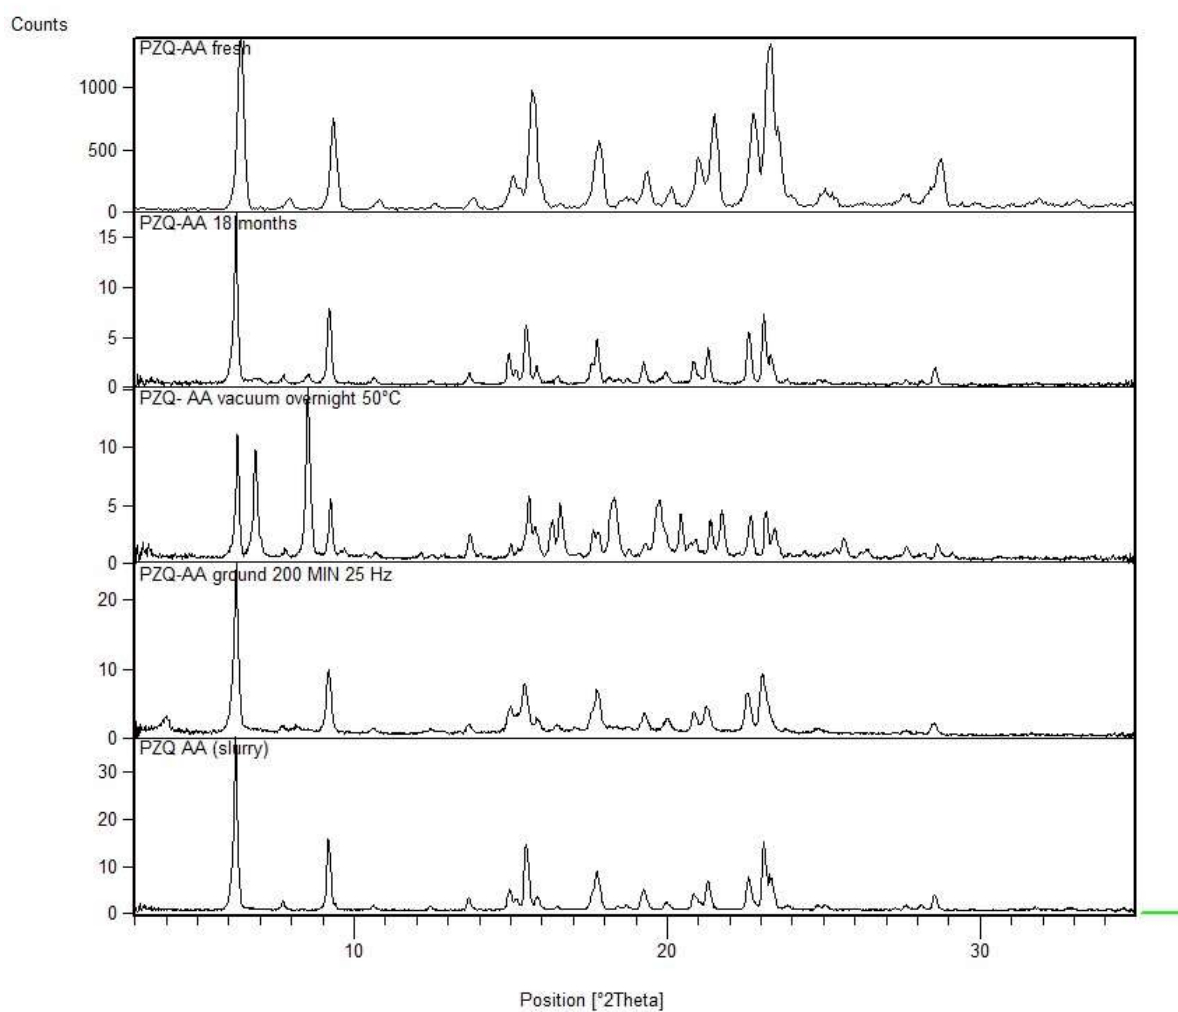

**Figure S2.** PZQ-AA: fresh sample, after 18 months at room temperature\*, under vacuum overnight at 50°C\*, ground for 200 minutes at 25 Hz\* and PZQ-AA prepared by slurry method\*. (\*=PXRD pattern were collected using a D2 Phaser(Bruker), using a zero background (Sylicon) sample holder, from 3 to 35° of 2θ, 0.02° step, time/step 0.6 sec, at 30 V, 10 mA).

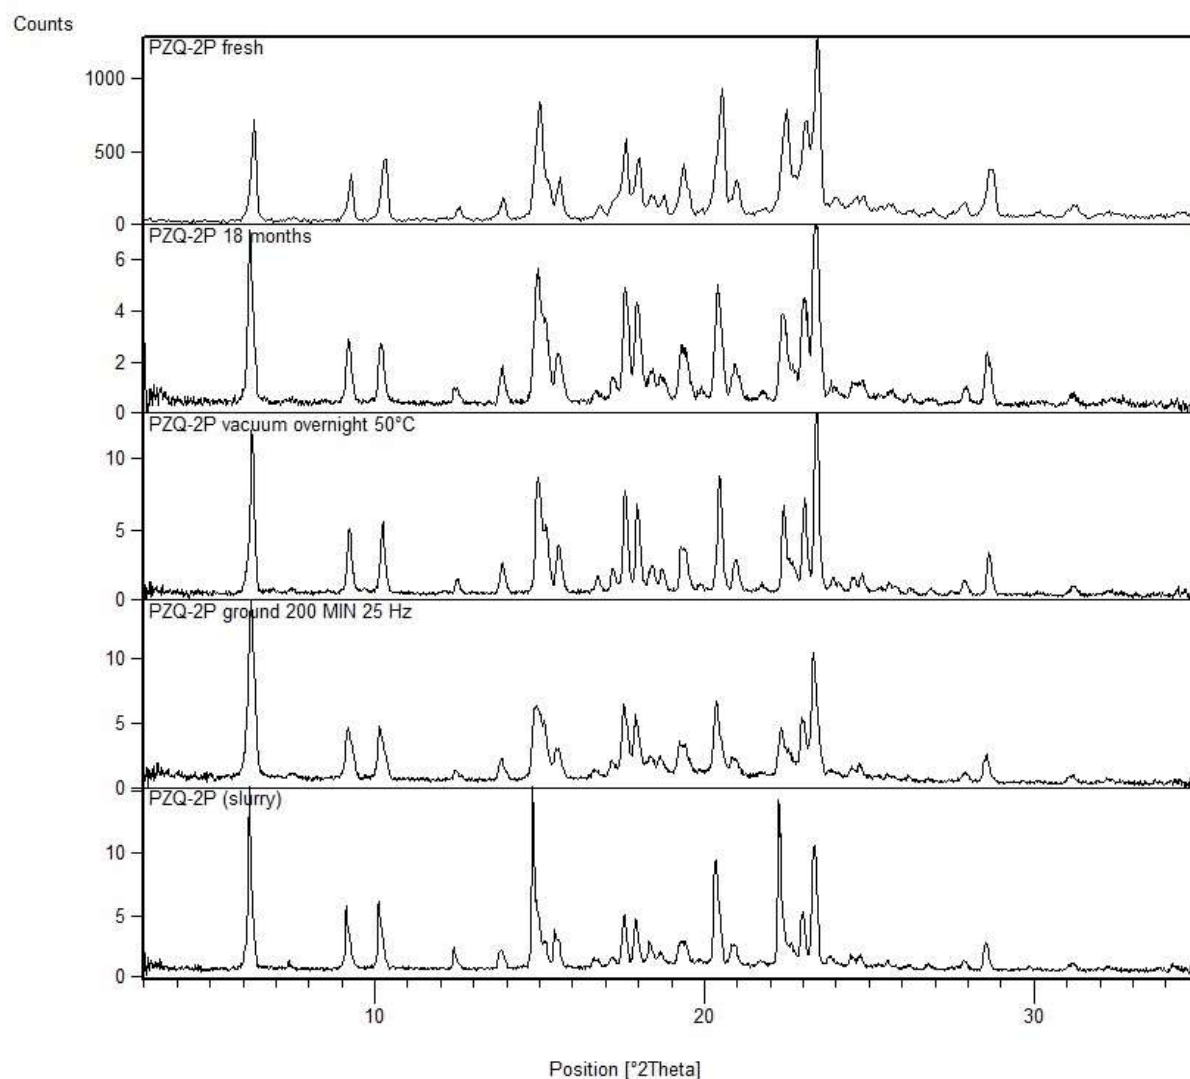

**Figure S3.** PZQ-2P: fresh sample, after 18 months at room temperature\*, under vacuum overnight at 50°C\*, ground for 200 minutes at 25 Hz\* and PZQ-AA prepared by slurry method\*. (\*=PXRD pattern were collected using a D2 Phaser (Bruker), using a zero background (Silicon) sample holder, from 3 to 35° of 2θ, 0.02° step, time/step 0.6 sec, at 30 V, 10 mA)

PZQ-AA

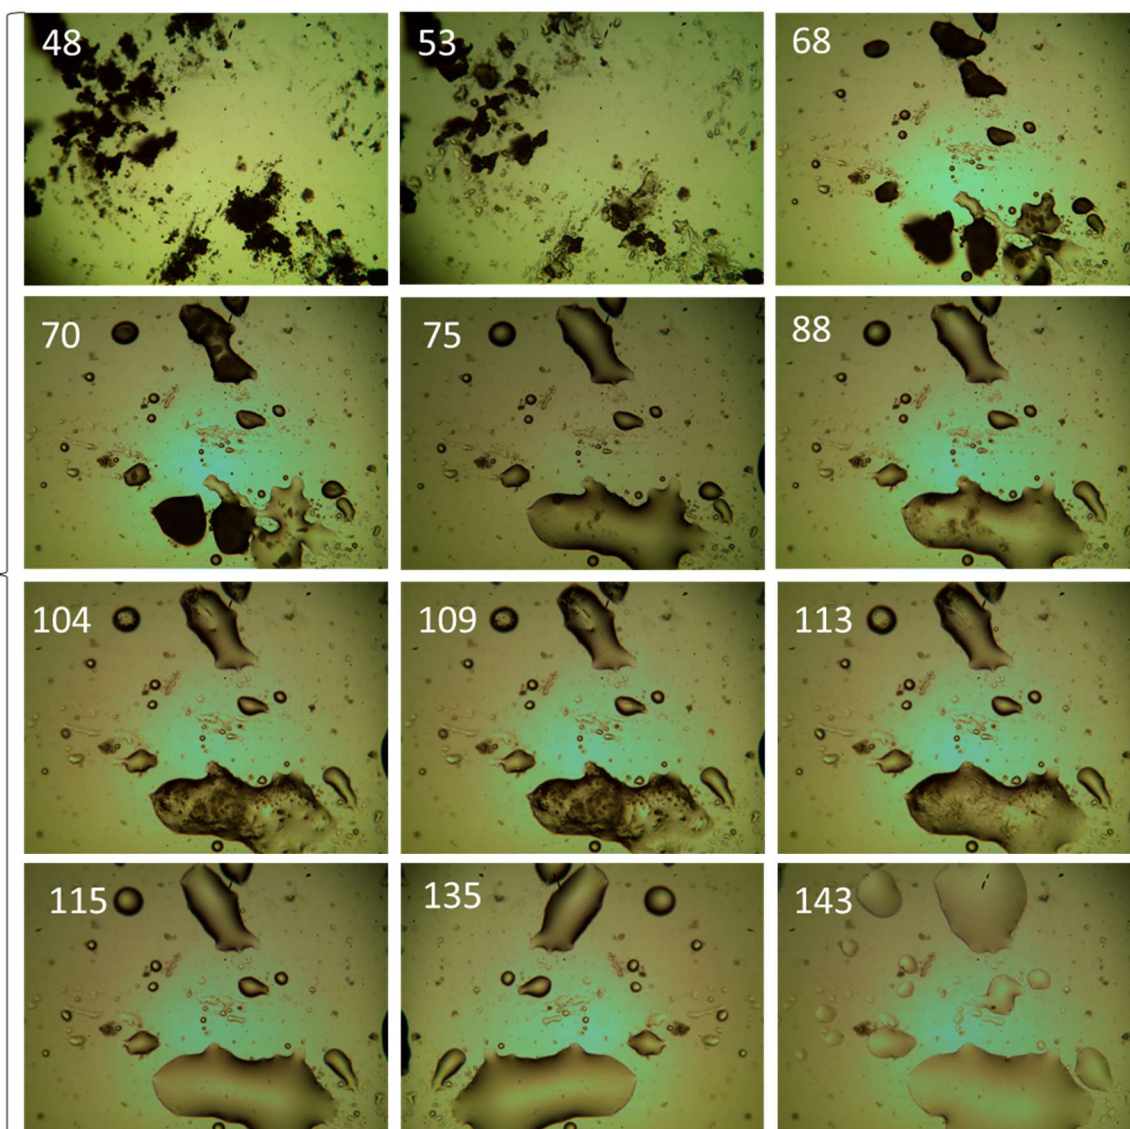



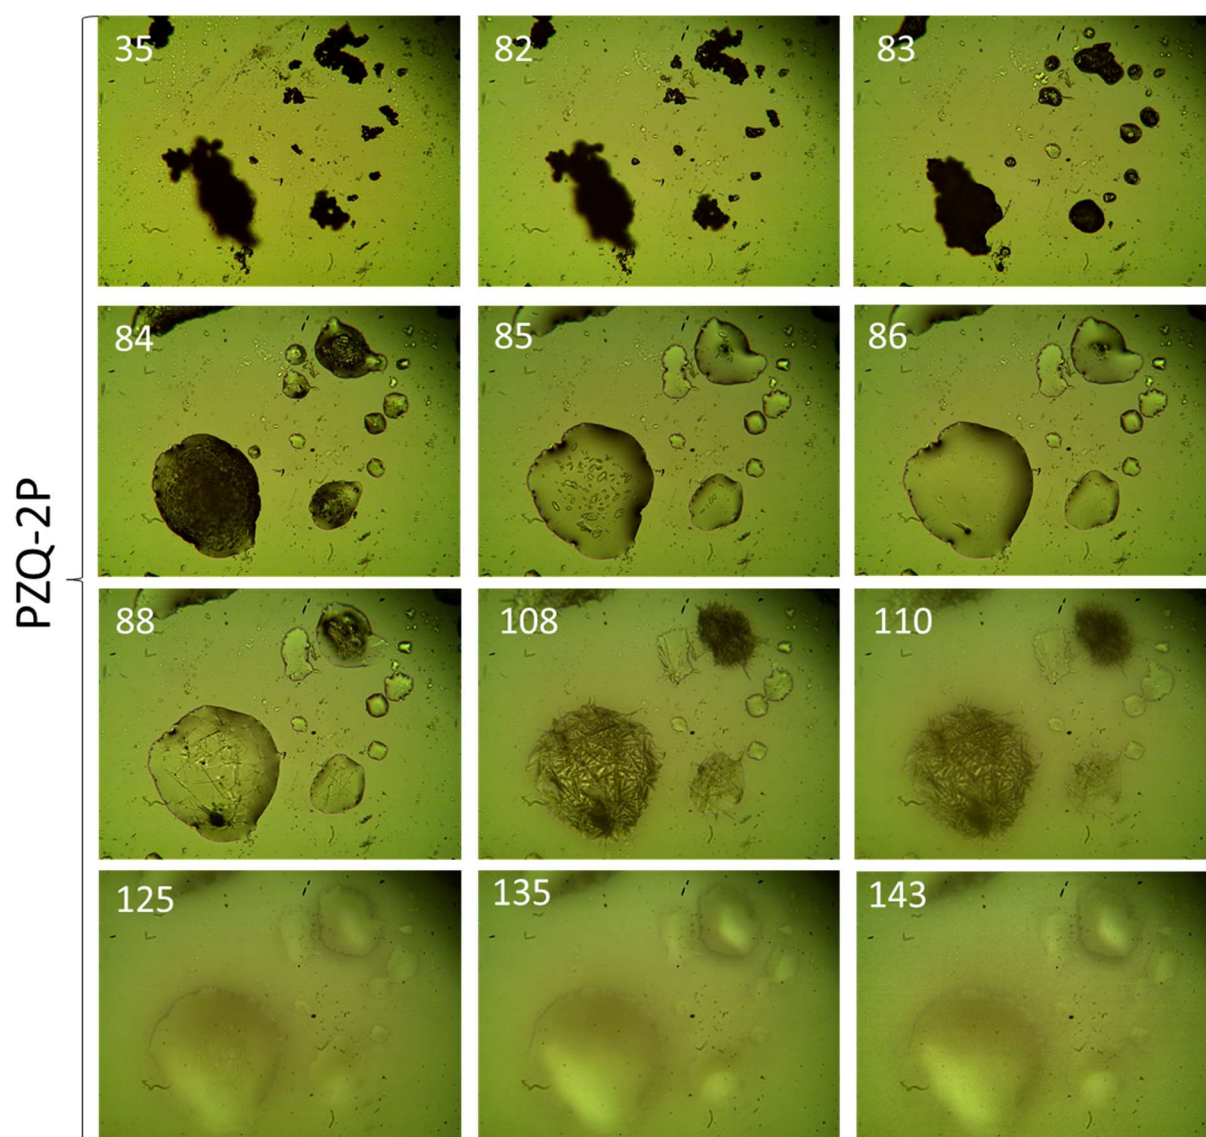

**Figure S4.** Optical microscopy images of PZQ-AA and PZQ-2P upon heating (with indication of operating temperature in each image). (Magnification 100x).

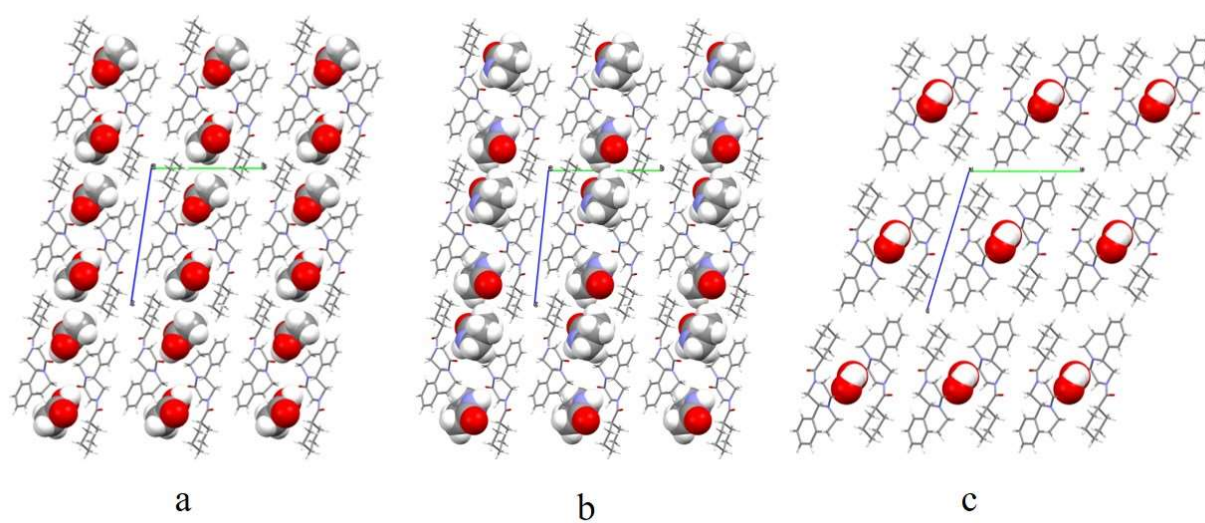

**Figure S5.** Crystal packing comparison along a axis of a) PZQ-AA , b) PZQ-2P and c) PZQ hemihydrate form.

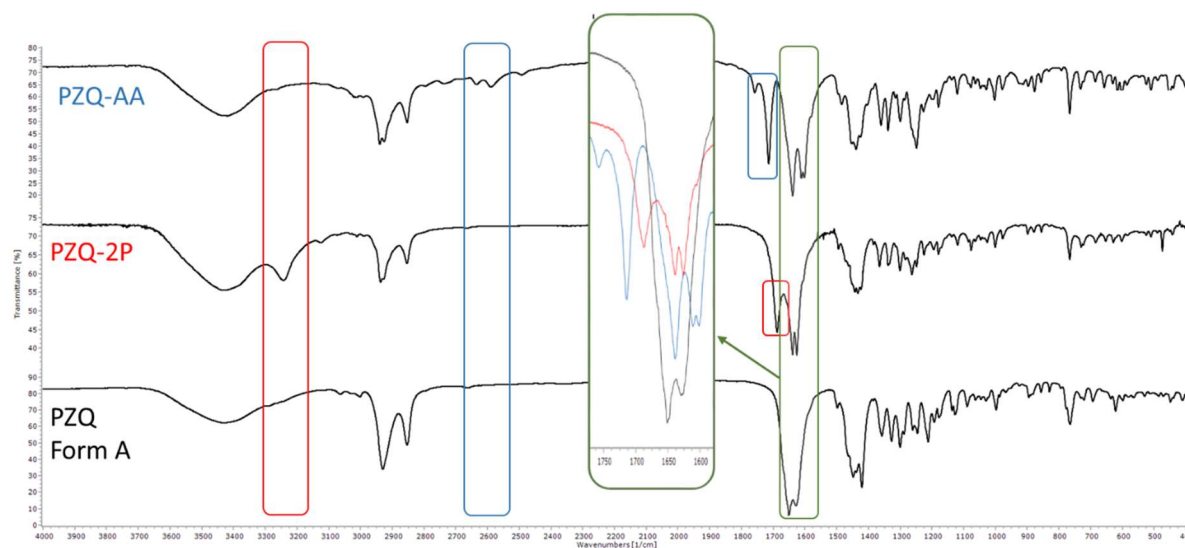

**Figure S6.** FT-IR spectra of PZQ-AA (blue), PZQ-2P (red) and raw PZQ form A (green). Frames highlight with above-mentioned different colors diagnostic regions

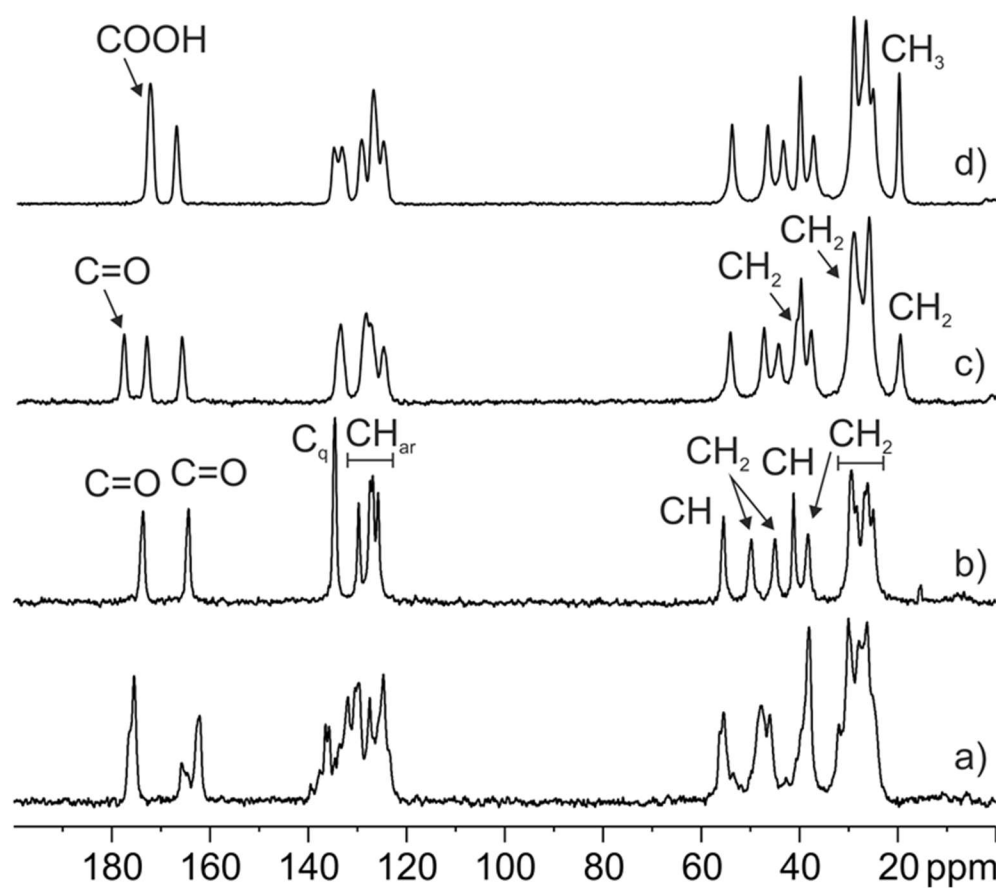

**Figure S7.**  $^{13}\text{C}$  (100.65 MHz) CPMAS SSNMR spectra of (a) PZQ form A, (b) PZQ form B, (c) PZQ-2P, and (d) PZQ-AA acquired at 12 kHz. Relevant assignments are reported for the PZQ molecule (b) and for the solvent molecules (c and d) resonances.

**Table S1.** Calculated shift / ppm and calculate shielding / ppm (for atom numbering please refer to Scheme).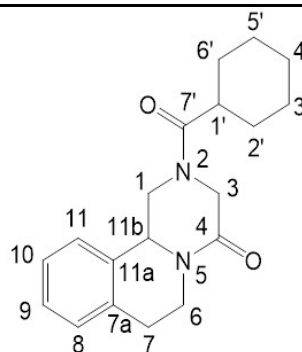

| Atom               | Acetic Acid solvate       |                        | 2-Pyrrolidone solvate     |                        |
|--------------------|---------------------------|------------------------|---------------------------|------------------------|
|                    | Calculate shielding / ppm | Calculated shift / ppm | Calculate shielding / ppm | Calculated shift / ppm |
| 7'                 | −1,68                     | 172,68                 | −2,2248                   | 173,22                 |
| 4                  | 3,08                      | 167,92                 | 4,342                     | 166,66                 |
| 11a                | 35,04                     | 135,96                 | 35,2514                   | 135,75                 |
| 7a                 | 32,97                     | 138,03                 | 33,8638                   | 137,14                 |
| 8                  | 38,70                     | 132,30                 | 39,8349                   | 131,17                 |
| 11                 | 44,17                     | 126,84                 | 44,1118                   | 126,89                 |
| 9                  | 42,34                     | 128,66                 | 40,1189                   | 130,88                 |
| 10                 | 42,09                     | 128,91                 | 40,9029                   | 130,10                 |
| 11b                | 117,58                    | 53,42                  | 116,1831                  | 54,82                  |
| 3                  | 125,49                    | 45,51                  | 124,7734                  | 46,23                  |
| 1                  | 129,93                    | 41,07                  | 128,1975                  | 42,80                  |
| 1'                 | 131,94                    | 39,06                  | 131,3745                  | 39,63                  |
| 6                  | 136,29                    | 34,71                  | 136,1598                  | 34,84                  |
| 6'                 | 143,32                    | 27,68                  | 143,7767                  | 27,22                  |
| 2'                 | 143,62                    | 27,38                  | 142,5896                  | 28,41                  |
| 7                  | 145,70                    | 25,30                  | 144,7837                  | 26,22                  |
| 4'                 | 145,39                    | 25,61                  | 145,9471                  | 25,05                  |
| 3'                 | 145,54                    | 25,46                  | 146,6308                  | 24,37                  |
| 5'                 | 147,40                    | 23,60                  | 146,4202                  | 24,58                  |
| AA COOH            | −6,13                     | 177,13                 |                           |                        |
| AA CH <sub>3</sub> | 152,97                    | 18,03                  |                           |                        |
| 2P CH <sub>2</sub> |                           |                        | 151,9089                  | 19,09                  |
| 2P CH <sub>2</sub> |                           |                        | 142,8449                  | 28,16                  |
| 2P CH <sub>2</sub> |                           |                        | 129,5215                  | 41,48                  |
| 2P CONH            |                           |                        | −7,9436                   | 178,94                 |



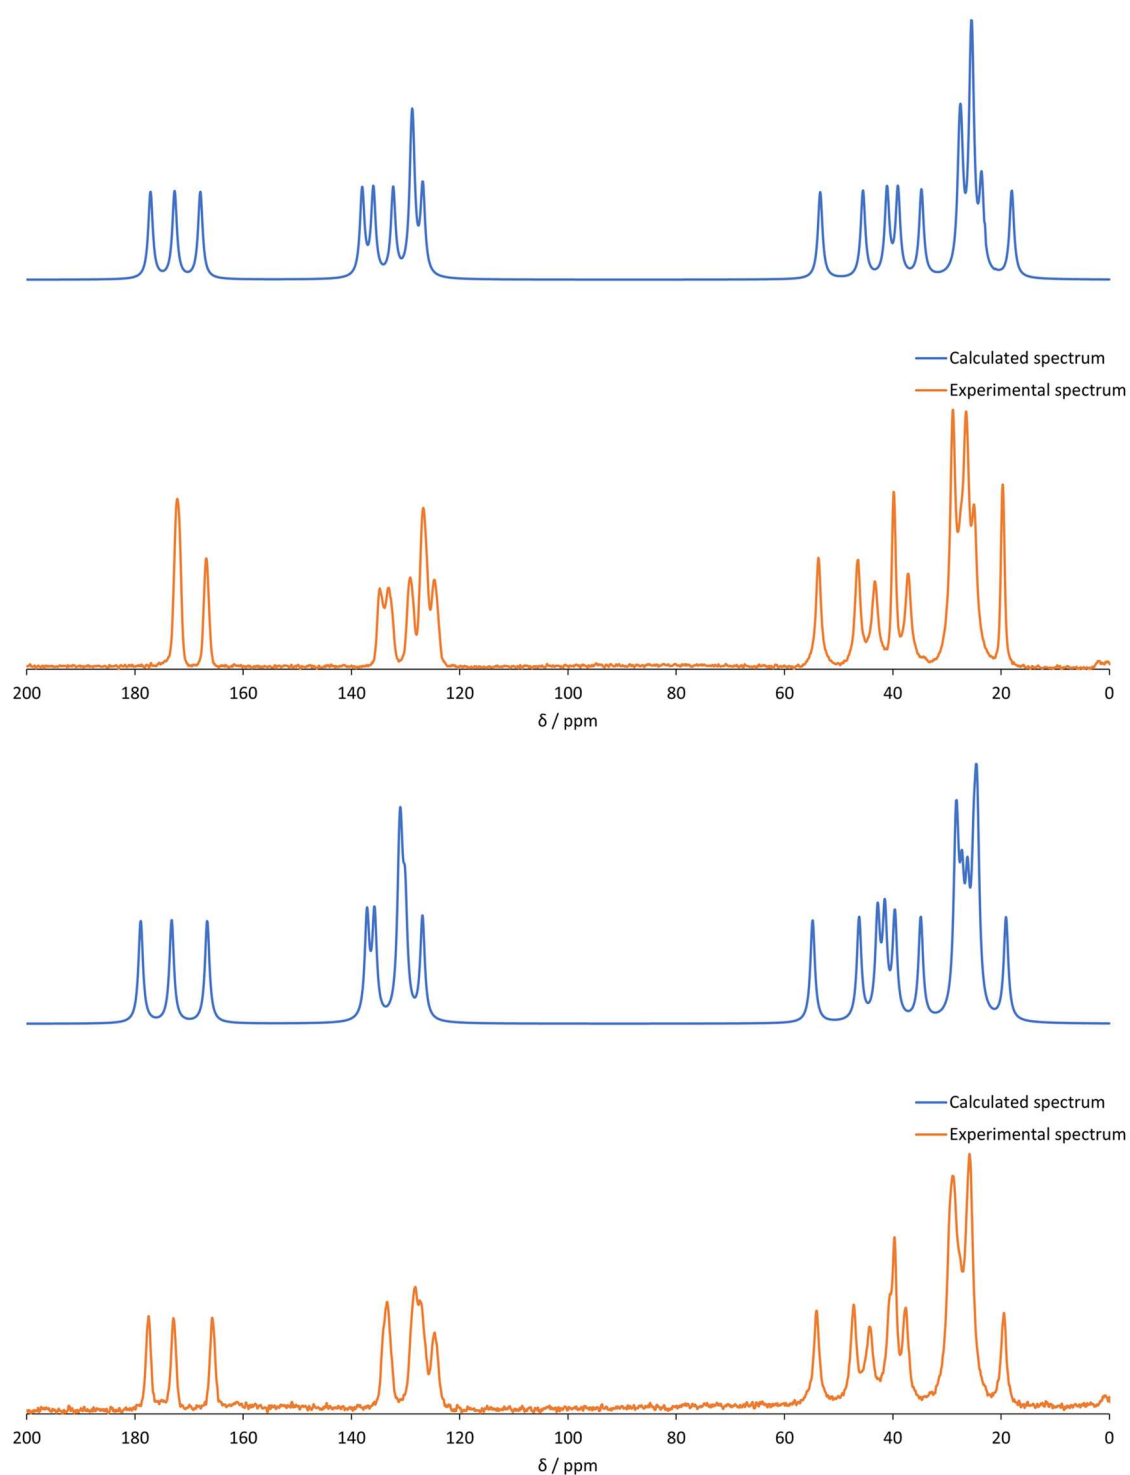

**Figure S8.** Comparison of experimental and calculated  $^{13}\text{C}$  SSNMR spectra of PZQ-AA (top) and PZQ-2P (bottom). The only significant disagreement is found for the COOH signal, at 177.1 and 172.1 ppm in the PZQ-AA calculated and experimental spectrum, respectively. The 5 ppm difference may be attributed to the difficulty in modelling the electronic environment around an acidic ionizable proton.

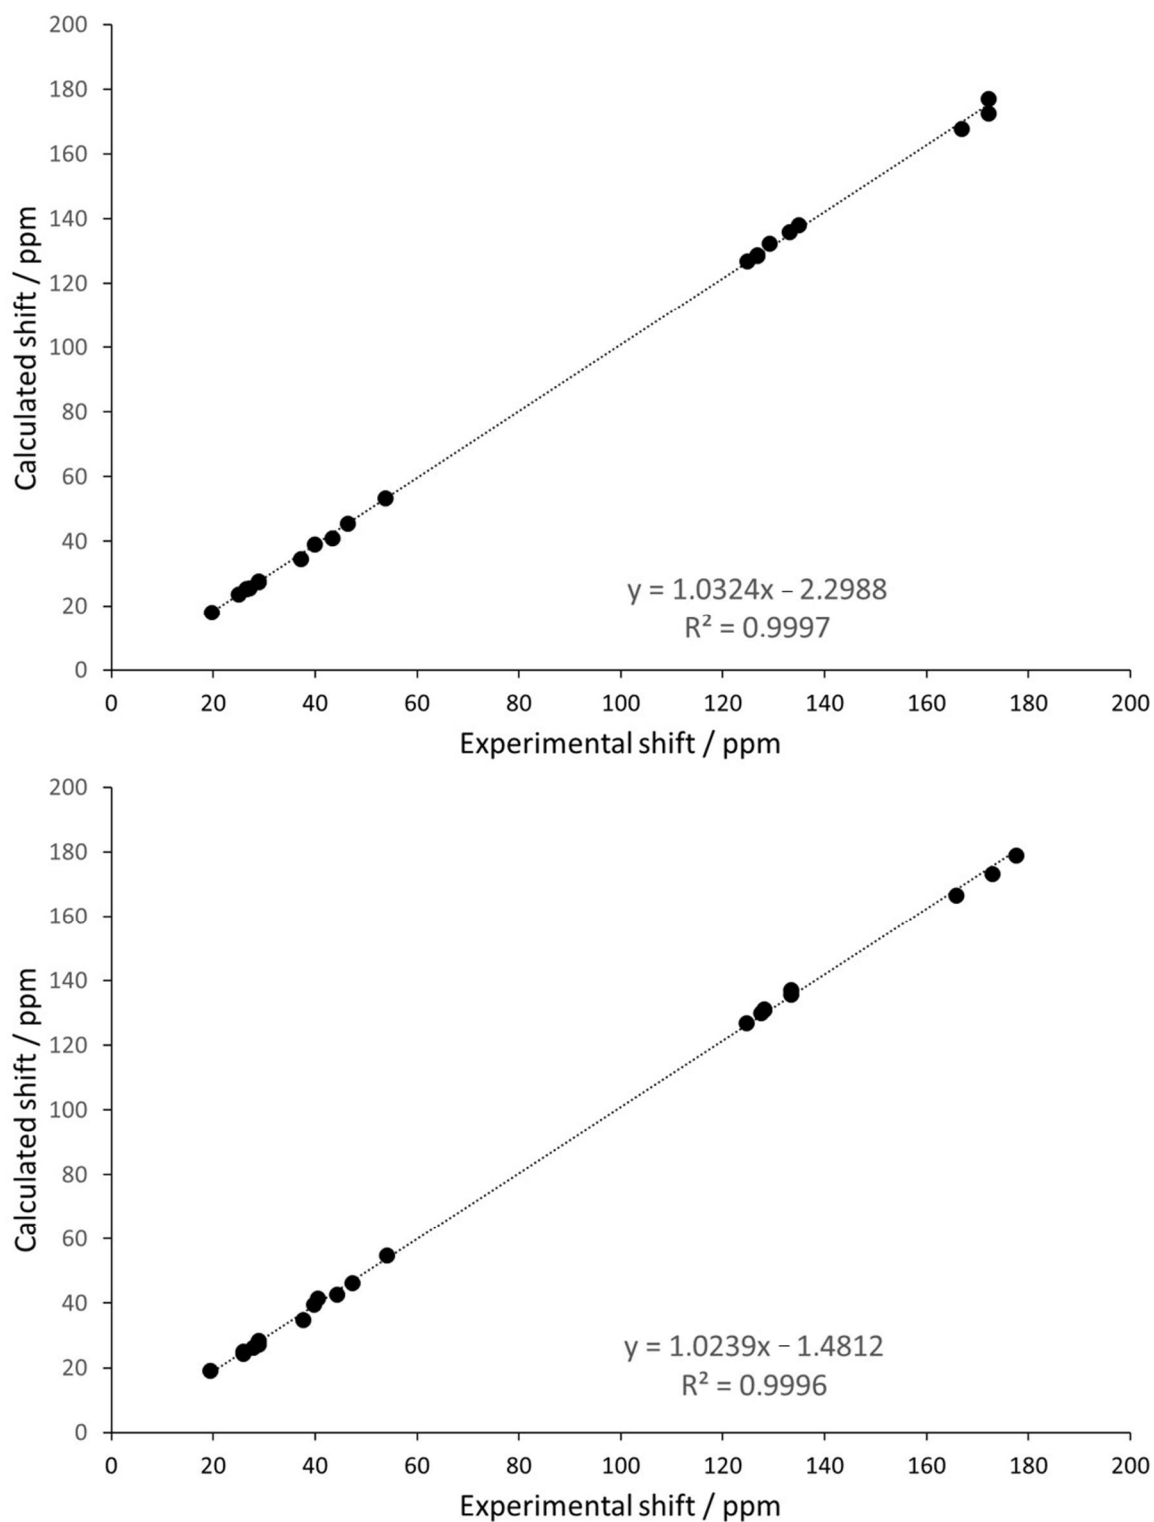

**Figure S9.** Quantitative comparison of experimental and calculated  $^{13}\text{C}$  SSNMR spectra of PZQ-AA (top) and PZQ-2P (bottom).
