# Supplementary material for: Mechanochemical Synthesis and Physicochemical Characterization of Previously Unreported Praziquantel Solvates with 2-Pyrrolidone and Acetic Acid
Source: Pharmaceutics. 2021 Oct 2;13(10):1606. doi: 10.3390/pharmaceutics13101606 (PMC8540171; doi:10.3390/pharmaceutics13101606)
Supplement: Supplementary file 1 [file pharmaceutics-13-01606-s001.zip]

Archive with 5 entries (5 files):
- checkcif-2P-final.pdf
- checkcif-AA-final.pdf
- pharmaceutics-1373176-supplementary.pdf
- PZQ-2P-final.cif
- PZQ-AA-final.cif
