# Supplementary material for: Mechanochemical Synthesis and Physicochemical Characterization of Previously Unreported Praziquantel Solvates with 2-Pyrrolidone and Acetic Acid
Source: Pharmaceutics. 2021 Oct 2;13(10):1606. doi: 10.3390/pharmaceutics13101606 (PMC8540171; doi:10.3390/pharmaceutics13101606)
Supplement: Supplementary file 1 [file pharmaceutics-13-01606-s001.zip › PZQ-2P-final.cif]

data_PZQ_2P

_publ_section_title
;
Mechanochemical Synthesis and Physicochemical Characterization 
of previously unreported Praziquantel Solvates 
with 2-pyrrolidone and Acetic Acid
;
 
_publ_contact_author_name        'Lara Gigli'
_publ_contact_author_address     
;
Elettra-Sincrotrone Trieste, S.S. 14 Km 163.5 in Area Science Park, 
34149 Basovizza - Trieste, Italy.
;
_publ_contact_author_email       lara.gigli@elettra.eu
_publ_contact_author_phone       '+39 040 375 8732'

loop_
_publ_author_name
_publ_author_address
Mechanochemical Synthesis and Physicochemical Characterization 
of previously unreported Praziquantel Solvates with 2-pyrrolidone and Acetic Acid
;
 
_publ_contact_author_name        'Lara Gigli'
_publ_contact_author_address     
;
Elettra-Sincrotrone Trieste, S.S. 14 Km 163.5 in Area Science Park, 
34149 Basovizza - Trieste, Italy.
;
_publ_contact_author_email       lara.gigli@elettra.eu
_publ_contact_author_phone       '+39 040 375 8732'

loop_
_publ_author_name
_publ_author_address
'Zanolla, Debora'
;
Department of Chemical and Pharmaceutical Sciences, 
University of Trieste, P.le Europa 1, 34127 Trieste, Italy.
;
'Gigli, Lara'
;
Elettra-Sincrotrone Trieste, S.S. 14 Km 163.5 in Area Science Park, 
34149 Basovizza - Trieste, Italy.
;
'Hasa, Dritan'
;
Department of Chemical and Pharmaceutical Sciences, 
University of Trieste, P.le Europa 1, 34127 Trieste, Italy.
;
'Chierotti, R. Michele'
;
Department of Chemistry and NIS Centre, University of Torino, 
V. Giuria 7, 10125 Torino, Italy.
;
'Arhangelskis, Mihails '
;
Faculty of Chemistry, University of Warsaw 1,
 Pasteura Street 02-093 Warsaw, Poland.
;
'Demitri, Nicola'
;
Elettra-Sincrotrone Trieste, S.S. 14 Km 163.5 in Area Science Park, 
34149 Basovizza - Trieste, Italy.
;
'Jones, William'
;
Department of Chemistry, University of Cambridge, 
Lensfield Road CB1 United Kingdom.
;
'Voinovich, Dario'
;
Department of Chemical and Pharmaceutical Sciences, 
University of Trieste, P.le Europa 1, 34127 Trieste, Italy
;
'Perissutti, Beatrice'
;
Department of Chemical and Pharmaceutical Sciences, 
University of Trieste, P.le Europa 1, 34127 Trieste, Italy.
;

_publ_section_abstract
;
The structure of PZQ-2P, C~23~H~31~O~3~N~3~, at 298 K has
triclinic (<i>P</i>-1) symmetry. 
;
;
_publ_contact_letter 
;
Please consider this CIF for publication. I certify that this contibution is the
original work of those listed as authors; that it has not been published
before (in any language or medium) and is not being considered for publication
elsewhere; that all authors concur with and are aware of the submission; that
all workers involved in the study are listed as authors or given proper credit
in the acknowledgements; that I have obtained permission for and acknowledged
the source of any excerpts from other copyright works; and that to the best of
my knowledge the paper contains no statements which are libellous, unlawful or
in any way actionable. All coauthors have made significant scientific
contributions to the work reported, including the ideas and their execution,
and share responsibility and accountability for the results.
;

_chemical_name_common            'PZQ-2P'
_chemical_formula_moiety         'C19 H24 N2 O2, C4 H7 N O'
_chemical_formula_sum            'C23 H31 N3 O3'
_chemical_formula_weight         397.51

_symmetry_cell_setting           triclinic
_symmetry_space_group_name_H-M   'P-1'
_symmetry_space_group_name_Hall  '-P 1'
_symmetry_Int_Tables_number      2

loop_

_space_group_symop_operation_xyz
' x,y,z'
'-x,-y,-z'


_cell_length_a                    6.1839(2)
_cell_length_b                    12.2615(3)
_cell_length_c                    14.5539(5)
_cell_angle_alpha                 93.823(2)
_cell_angle_beta                  100.064(2)
_cell_angle_gamma                 101.6930(10)
_cell_volume                      1058.02(5)
_cell_formula_units_Z             2

_pd_spec_mounting                
;
'Boron capillary'
;
_pd_spec_mount_mode              transmission
_pd_spec_shape                   cylinder  
_pd_calibration_special_details  
;
LaB6 standard reference powder (NIST 660a) capillary
;
_pd_char_colour                  'White'
_pd_meas_scan_method             cont
_pd_meas_2theta_range_min        2.00
_pd_meas_2theta_range_max        26.00

_exptl_crystal_description       'Flat plates'
_cell_measurement_temperature    298(2)
_diffrn_ambient_temperature      298(2)
_diffrn_radiation_wavelength     0.700

_diffrn_radiation_type           Synchrotron
_diffrn_source                   'Elettra Synchrotron - XRD1 BL'
_diffrn_measurement_device_type  
;
'Huber 4-circles Kappa Goniometer, Pilatus 2M detector'
;

_computing_cell_refinement       'TOPAS Academic (Coelho 2018)'
_computing_structure_solution    'EXPO 2014 (Altomare 2014)'
_computing_structure_refinement  'TOPAS Academic (Coelho 2018)'

loop_
_atom_type_symbol
_atom_type_description
_atom_type_scat_dispersion_real
_atom_type_scat_dispersion_imag
_atom_type_scat_source
C C 0.0030 0.0016 'S.Brennan & P.L.Cowan (1992).Rev.Sci.Instr.,63,650'
H H 0.0000 0.0000 'S.Brennan & P.L.Cowan (1992).Rev.Sci.Instr.,63,650'
N N 0.0059 0.0032 'S.Brennan & P.L.Cowan (1992).Rev.Sci.Instr.,63,650'
O O 0.0105 0.0059 'S.Brennan & P.L.Cowan (1992).Rev.Sci.Instr.,63,650'

_exptl_crystal_F_000                                  428
_exptl_absorpt_coefficient_mu                         0.080
_exptl_crystal_density_diffrn                         1.248

_pd_proc_ls_profile_function     pseudo-Voigt
_pd_proc_ls_background_function  'Chebyshev polynomial'

_pd_proc_ls_prof_wR_factor        0.040              
_pd_proc_ls_prof_wR_expected       0.009
_refine_ls_R_Fsqd_factor          0.025

_refine_ls_matrix_type            full    
_refine_ls_weighting_scheme   'calc'                                    
_refine_ls_weighting_details      ?       
_refine_ls_shift/su_max           0.001
_refine_ls_number_restraints      0       
_refine_ls_number_constraints     143     

# The following item is the same as CHI, the square root of 'CHI squared'
_refine_ls_goodness_of_fit_all    3.79


loop_
 _atom_site_label
 _atom_site_type_symbol
 _atom_site_fract_x
 _atom_site_fract_y
 _atom_site_fract_z
 _atom_site_U_iso_or_equiv
 _atom_site_adp_type
 _atom_site_occupancy
 _atom_site_calc_flag
 _atom_site_refinement_flags_posn
 _atom_site_refinement_flags_adp
 _atom_site_refinement_flags_occupancy
 _atom_site_disorder_assembly
 _atom_site_disorder_group
O1 O 0.71340(2) 0.35721(2) 0.40401(2) 0.020(1) Uiso 1  . . . . . .
O2 O 1.27521(3) 0.11811(2) 0.23728(2) 0.020(1) Uiso 1  . . . . . .
N1 N 1.00719(2) 0.16761(2) 0.30533(2) 0.020(1) Uiso 1  . . . . . .
N2 N 1.01511(2) 0.29359(2) 0.47096(2) 0.020(1) Uiso 1  . . . . . .
C1 C 0.82051(2) 0.22162(2) 0.31006(2) 0.020(1) Uiso 1  . . . . . .
C18 C 1.07527(4) 0.24935(2) -0.01798(2) 0.020(1) Uiso 1  . . . . . .
C14 C 1.01028(3) 0.19873(2) 0.13983(2) 0.020(1) Uiso 1  . . . . . .
C2 C 0.84988(2) 0.29620(2) 0.39948(2) 0.020(1) Uiso 1  . . . . . .
C3 C 1.17949(2) 0.22218(2) 0.46792(2) 0.020(1) Uiso 1  . . . . . .
C4 C 1.08373(2) 0.12459(2) 0.39282(2) 0.020(1) Uiso 1  . . . . . .
C5 C 1.04678(3) 0.36668(2) 0.55817(2) 0.020(1) Uiso 1  . . . . . .
C6 C 1.01373(3) 0.29547(2) 0.63686(2) 0.020(1) Uiso 1  . . . . . .
C7 C 1.16581(3) 0.21346(2) 0.64173(2) 0.020(1) Uiso 1  . . . . . .
C8 C 1.24895(3) 0.18247(2) 0.56341(2) 0.020(1) Uiso 1  . . . . . .
C9 C 1.40353(3) 0.11416(2) 0.57218(2) 0.020(1) Uiso 1  . . . . . .
C10 C 1.47148(3) 0.07544(2) 0.65687(2) 0.020(1) Uiso 1  . . . . . .
C11 C 1.38405(4) 0.10274(2) 0.73349(2) 0.020(1) Uiso 1  . . . . . .
C12 C 1.23396(4) 0.17114(2) 0.72572(2) 0.020(1) Uiso 1  . . . . . .
C13 C 1.10873(3) 0.15881(2) 0.23071(2) 0.020(1) Uiso 1  . . . . . .
C15 C 0.78775(3) 0.12264(2) 0.09394(2) 0.020(1) Uiso 1  . . . . . .
C16 C 0.69160(4) 0.16196(2) 0.00136(2) 0.020(1) Uiso 1  . . . . . .
C17 C 0.85774(4) 0.17246(2) -0.06487(2) 0.020(1) Uiso 1  . . . . . .
C19 C 1.17372(3) 0.20743(2) 0.07260(2) 0.020(1) Uiso 1  . . . . . .
H1 H 0.802480 0.265723 0.257472 0.040(3) Uiso 1  . . . . . .
H2 H 0.683606 0.164218 0.303774 0.040(3) Uiso 1  . . . . . .
H3 H 1.314078 0.267181 0.451009 0.040(3) Uiso 1  . . . . . .
H4 H 0.958949 0.074593 0.410827 0.040(3) Uiso 1  . . . . . .
H5 H 1.198115 0.082889 0.385295 0.040(3) Uiso 1  . . . . . .
H6 H 1.197187 0.413973 0.571455 0.040(3) Uiso 1  . . . . . .
H7 H 0.938992 0.414584 0.551790 0.040(3) Uiso 1  . . . . . .
H8 H 1.046372 0.342760 0.695769 0.040(3) Uiso 1  . . . . . .
H9 H 0.858128 0.254872 0.626779 0.040(3) Uiso 1  . . . . . .
H10 H 1.461692 0.094262 0.520266 0.040(3) Uiso 1  . . . . . .
H11 H 1.576973 0.030738 0.662147 0.040(3) Uiso 1  . . . . . .
H12 H 1.426277 0.074828 0.790080 0.040(3) Uiso 1  . . . . . .
H13 H 1.176001 0.189741 0.777932 0.040(3) Uiso 1  . . . . . .
H14 H 0.983797 0.273731 0.154243 0.040(3) Uiso 1  . . . . . .
H15 H 0.808730 0.047040 0.082629 0.040(3) Uiso 1  . . . . . .
H16 H 0.681686 0.121439 0.135961 0.040(3) Uiso 1  . . . . . .
H17 H 0.654418 0.234059 0.013677 0.040(3) Uiso 1  . . . . . .
H18 H 0.554780 0.109064 -0.028131 0.040(3) Uiso 1  . . . . . .
H19 H 0.794713 0.201871 -0.121453 0.040(3) Uiso 1  . . . . . .
H20 H 0.883718 0.099260 -0.082381 0.040(3) Uiso 1  . . . . . .
H21 H 1.181333 0.254351 -0.060296 0.040(3) Uiso 1  . . . . . .
H22 H 1.050091 0.323950 -0.004365 0.040(3) Uiso 1  . . . . . .
H23 H 1.314236 0.258526 0.101694 0.040(3) Uiso 1  . . . . . .
H24 H 1.205696 0.134533 0.058687 0.040(3) Uiso 1  . . . . . .
O3 O 0.70778(3) 0.43321(2) 0.15649(2) 0.020(1) Uiso 1  . . . . . .
N3 N 0.47417(3) 0.44990(2) 0.26303(2) 0.020(1) Uiso 1  . . . . . .
C20 C 0.44910(4) 0.56372(2) 0.14105(2) 0.020(1) Uiso 1  . . . . . .
C21 C 0.24555(4) 0.56102(2) 0.18847(2) 0.020(1) Uiso 1  . . . . . .
C22 C 0.31750(3) 0.51781(2) 0.28376(2) 0.020(1) Uiso 1  . . . . . .
C23 C 0.56341(3) 0.47441(2) 0.18502(2) 0.020(1) Uiso 1  . . . . . .
H25 H 0.406650 0.545031 0.064543 0.040(3) Uiso 1  . . . . . .
H26 H 0.570515 0.644817 0.156741 0.040(3) Uiso 1  . . . . . .
H27 H 0.098320 0.500831 0.147384 0.040(3) Uiso 1  . . . . . .
H28 H 0.198867 0.642324 0.196594 0.040(3) Uiso 1  . . . . . .
H29 H 0.401042 0.587997 0.338364 0.040(3) Uiso 1  . . . . . .
H30 H 0.174323 0.468905 0.308875 0.040(3) Uiso 1  . . . . . .
H31 H 0.527386 0.394593 0.306615 0.040(3) Uiso 1  . . . . . .


# 10. MOLECULAR GEOMETRY
                      
_geom_special_details            
;
 Bond distances, angles etc. have been calculated using the
 rounded fractional coordinates. All su's are estimated
 from the variances of the (full) variance-covariance matrix.
 The cell esds are taken into account in the estimation of
 distances, angles and torsion angles
;

loop_
_geom_bond_atom_site_label_1
_geom_bond_atom_site_label_2
_geom_bond_distance
_geom_bond_site_symmetry_1
_geom_bond_site_symmetry_2
_geom_bond_publ_flag
 O1      C2        1.2430(5)                     .       .                   yes
 O2      C13       1.2241(5)                     .       .                   yes
 N1      C1        1.4518(5)                     .       .                   yes
 N1      C4        1.4504(6)                     .       .                   yes
 N1      C13       1.3548(6)                     .       .                   yes
 N2      C2        1.3317(5)                     .       .                   yes
 N2      C3        1.4742(5)                     .       .                   yes
 N2      C5        1.4638(6)                     .       .                   yes
 C1      C2        1.5014(6)                     .       .                   no
 C3      C4        1.5131(6)                     .       .                   no
 C3      C8        1.5230(6)                     .       .                   no
 O3      C23       1.2284(5)                     .       .                   yes
 C5      C6        1.5029(6)                     .       .                   no
 C6      C7        1.5067(6)                     .       .                   no
 C7      C12       1.3908(6)                     .       .                   no
 C7      C8        1.3908(6)                     .       .                   no
 C8      C9        1.3884(5)                     .       .                   no
 C9      C10       1.3781(6)                     .       .                   no
 C10     C11       1.3719(6)                     .       .                   no
 C11     C12       1.3672(6)                     .       .                   no
 C13     C14       1.5117(6)                     .       .                   no
 C14     C19       1.5186(6)                     .       .                   no
 C14     C15       1.5118(6)                     .       .                   no
 C15     C16       1.5246(6)                     .       .                   no
 C16     C17       1.5200(6)                     .       .                   no
 C17     C18       1.4978(6)                     .       .                   no
 C18     C19       1.5197(6)                     .       .                   no
 C1      H1           0.9700                     .       .                   no
 C1      H2           0.9700                     .       .                   no
 N3      C22       1.4556(6)                     .       .                   yes
 N3      C23       1.3716(6)                     .       .                   yes
 C3      H3           0.9800                     .       .                   no
 C4      H5           0.9700                     .       .                   no
 C4      H4           0.9700                     .       .                   no
 C5      H6           0.9700                     .       .                   no
 C5      H7           0.9700                     .       .                   no
 C6      H8           0.9700                     .       .                   no
 C6      H9           0.9700                     .       .                   no
 C9      H10          0.9300                     .       .                   no
 C10     H11          0.9300                     .       .                   no
 C11     H12          0.9300                     .       .                   no
 C12     H13          0.9300                     .       .                   no
 C14     H14          0.9800                     .       .                   no
 C15     H15          0.9700                     .       .                   no
 C15     H16          0.9700                     .       .                   no
 C16     H17          0.9700                     .       .                   no
 C16     H18          0.9700                     .       .                   no
 C17     H20          0.9700                     .       .                   no
 C17     H19          0.9700                     .       .                   no
 C18     H21          0.9700                     .       .                   no
 C18     H22          0.9700                     .       .                   no
 C19     H23          0.9700                     .       .                   no
 C19     H24          0.9700                     .       .                   no
 N3      H31          1.0200                     .       .                   no
 C20     C23       1.5354(6)                     .       .                   no
 C20     C21       1.5335(6)                     .       .                   no
 C21     C22       1.5427(6)                     .       .                   no
 C20     H25          1.1000                     .       .                   no
 C20     H26          1.1000                     .       .                   no
 C21     H27          1.1000                     .       .                   no
 C21     H28          1.1000                     .       .                   no
 C22     H29          1.1100                     .       .                   no
 C22     H30          1.1000                     .       .                   no

loop_
_geom_angle_atom_site_label_1
_geom_angle_atom_site_label_2
_geom_angle_atom_site_label_3
_geom_angle
_geom_angle_site_symmetry_1
_geom_angle_site_symmetry_2
_geom_angle_site_symmetry_3
_geom_angle_publ_flag
 C1      N1      C4        112.26(2)             .       .       .           yes
 C1      N1      C13       126.10(2)             .       .       .           yes
 C4      N1      C13       121.62(2)             .       .       .           yes
 C2      N2      C3        123.81(2)             .       .       .           yes
 C2      N2      C5        120.38(2)             .       .       .           yes
 C3      N2      C5        115.79(2)             .       .       .           yes
 N1      C1      C2        113.63(2)             .       .       .           yes
 O1      C2      N2        122.45(3)             .       .       .           yes
 O1      C2      C1        117.66(2)             .       .       .           yes
 N2      C2      C1        119.88(2)             .       .       .           yes
 N2      C3      C4        109.86(2)             .       .       .           yes
 N2      C3      C8        111.26(2)             .       .       .           yes
 C4      C3      C8        111.48(2)             .       .       .           no
 N1      C4      C3        108.71(2)             .       .       .           yes
 N2      C5      C6        108.95(2)             .       .       .           yes
 C5      C6      C7        110.34(2)             .       .       .           no
 C6      C7      C8        120.65(2)             .       .       .           no
 C6      C7      C12       120.64(2)             .       .       .           no
 C8      C7      C12       118.65(2)             .       .       .           no
 C3      C8      C7        122.42(2)             .       .       .           no
 C3      C8      C9        118.32(2)             .       .       .           no
 C7      C8      C9        119.25(2)             .       .       .           no
 C8      C9      C10       120.73(2)             .       .       .           no
 C9      C10     C11       120.17(2)             .       .       .           no
 C10     C11     C12       119.43(3)             .       .       .           no
 C7      C12     C11       121.71(3)             .       .       .           no
 O2      C13     N1        120.11(3)             .       .       .           yes
 O2      C13     C14       121.26(2)             .       .       .           yes
 N1      C13     C14       118.63(2)             .       .       .           yes
 C13     C14     C15       111.47(2)             .       .       .           no
 C13     C14     C19       110.79(2)             .       .       .           no
 C15     C14     C19       110.11(2)             .       .       .           no
 C14     C15     C16       111.23(2)             .       .       .           no
 C15     C16     C17       111.50(2)             .       .       .           no
 C16     C17     C18       109.85(2)             .       .       .           no
 C17     C18     C19       111.00(2)             .       .       .           no
 C14     C19     C18       110.52(2)             .       .       .           no
 N1      C1      H1           109.00             .       .       .           no
 N1      C1      H2           109.00             .       .       .           no
 C2      C1      H1           109.00             .       .       .           no
 C2      C1      H2           109.00             .       .       .           no
 H1      C1      H2           108.00             .       .       .           no
 N2      C3      H3           108.00             .       .       .           no
 C4      C3      H3           108.00             .       .       .           no
 C8      C3      H3           108.00             .       .       .           no
 C22     N3      C23       114.42(2)             .       .       .           yes
 N1      C4      H4           110.00             .       .       .           no
 N1      C4      H5           110.00             .       .       .           no
 C3      C4      H5           110.00             .       .       .           no
 H4      C4      H5           108.00             .       .       .           no
 C3      C4      H4           110.00             .       .       .           no
 N2      C5      H7           110.00             .       .       .           no
 C6      C5      H6           110.00             .       .       .           no
 C6      C5      H7           110.00             .       .       .           no
 H6      C5      H7           108.00             .       .       .           no
 N2      C5      H6           110.00             .       .       .           no
 C5      C6      H9           110.00             .       .       .           no
 C7      C6      H8           110.00             .       .       .           no
 C5      C6      H8           110.00             .       .       .           no
 H8      C6      H9           108.00             .       .       .           no
 C7      C6      H9           109.00             .       .       .           no
 C8      C9      H10          120.00             .       .       .           no
 C10     C9      H10          120.00             .       .       .           no
 C11     C10     H11          120.00             .       .       .           no
 C9      C10     H11          120.00             .       .       .           no
 C10     C11     H12          120.00             .       .       .           no
 C12     C11     H12          120.00             .       .       .           no
 C11     C12     H13          119.00             .       .       .           no
 C7      C12     H13          119.00             .       .       .           no
 C15     C14     H14          108.00             .       .       .           no
 C19     C14     H14          108.00             .       .       .           no
 C13     C14     H14          108.00             .       .       .           no
 C14     C15     H16          109.00             .       .       .           no
 C16     C15     H15          109.00             .       .       .           no
 C14     C15     H15          109.00             .       .       .           no
 H15     C15     H16          108.00             .       .       .           no
 C16     C15     H16          109.00             .       .       .           no
 C15     C16     H17          109.00             .       .       .           no
 C15     C16     H18          109.00             .       .       .           no
 C17     C16     H18          109.00             .       .       .           no
 H17     C16     H18          108.00             .       .       .           no
 C17     C16     H17          109.00             .       .       .           no
 C16     C17     H20          110.00             .       .       .           no
 C18     C17     H19          110.00             .       .       .           no
 C18     C17     H20          110.00             .       .       .           no
 H19     C17     H20          108.00             .       .       .           no
 C16     C17     H19          109.00             .       .       .           no
 C17     C18     H22          110.00             .       .       .           no
 C19     C18     H21          110.00             .       .       .           no
 C17     C18     H21          109.00             .       .       .           no
 H21     C18     H22          108.00             .       .       .           no
 C19     C18     H22          109.00             .       .       .           no
 C14     C19     H23          110.00             .       .       .           no
 C14     C19     H24          110.00             .       .       .           no
 C18     C19     H24          109.00             .       .       .           no
 H23     C19     H24          108.00             .       .       .           no
 C18     C19     H23          110.00             .       .       .           no
 C23     N3      H31          122.00             .       .       .           no
 C22     N3      H31          123.00             .       .       .           no
 C21     C20     C23       104.24(2)             .       .       .           no
 C20     C21     C22       103.72(2)             .       .       .           no
 N3      C22     C21       102.55(2)             .       .       .           yes
 N3      C23     C20       106.65(2)             .       .       .           yes
 O3      C23     N3        126.48(3)             .       .       .           yes
 O3      C23     C20       126.87(3)             .       .       .           yes
 C21     C20     H25          114.00             .       .       .           no
 C21     C20     H26          113.00             .       .       .           no
 C23     C20     H25          110.00             .       .       .           no
 C23     C20     H26          108.00             .       .       .           no
 H25     C20     H26          107.00             .       .       .           no
 C20     C21     H27          110.00             .       .       .           no
 C20     C21     H28          114.00             .       .       .           no
 C22     C21     H27          109.00             .       .       .           no
 C22     C21     H28          112.00             .       .       .           no
 H27     C21     H28          108.00             .       .       .           no
 N3      C22     H29          111.00             .       .       .           no
 N3      C22     H30          112.00             .       .       .           no
 C21     C22     H29          111.00             .       .       .           no
 C21     C22     H30          112.00             .       .       .           no
 H29     C22     H30          107.00             .       .       .           no
 
loop_
_geom_torsion_atom_site_label_1
_geom_torsion_atom_site_label_2
_geom_torsion_atom_site_label_3
_geom_torsion_atom_site_label_4
_geom_torsion
_geom_torsion_site_symmetry_1
_geom_torsion_site_symmetry_2
_geom_torsion_site_symmetry_3
_geom_torsion_site_symmetry_4
_geom_torsion_publ_flag
 C4      N1      C1      C2         43.33(3)     .       .       .       .   no
 C13     N1      C1      C2       -134.89(3)     .       .       .       .   no
 C1      N1      C4      C3        -65.09(2)     .       .       .       .   no
 C13     N1      C4      C3        113.22(2)     .       .       .       .   no
 C1      N1      C13     O2        174.88(2)     .       .       .       .   no
 C1      N1      C13     C14        -5.90(4)     .       .       .       .   no
 C4      N1      C13     O2         -3.18(4)     .       .       .       .   no
 C4      N1      C13     C14       176.04(2)     .       .       .       .   no
 C3      N2      C2      O1        179.94(2)     .       .       .       .   no
 C3      N2      C2      C1          1.35(3)     .       .       .       .   no
 C5      N2      C2      O1         -2.00(4)     .       .       .       .   no
 C5      N2      C2      C1        179.41(2)     .       .       .       .   no
 C2      N2      C3      C4        -22.27(3)     .       .       .       .   no
 C2      N2      C3      C8       -146.21(2)     .       .       .       .   no
 C5      N2      C3      C4        159.59(2)     .       .       .       .   no
 C5      N2      C3      C8         35.65(3)     .       .       .       .   no
 C2      N2      C5      C6        117.62(2)     .       .       .       .   no
 C3      N2      C5      C6        -64.17(2)     .       .       .       .   no
 N1      C1      C2      O1        170.42(2)     .       .       .       .   no
 N1      C1      C2      N2        -10.92(3)     .       .       .       .   no
 N2      C3      C4      N1         52.38(2)     .       .       .       .   no
 C8      C3      C4      N1        176.20(1)     .       .       .       .   no
 N2      C3      C8      C7         -0.96(3)     .       .       .       .   no
 N2      C3      C8      C9        180.00(5)     .       .       .       .   no
 C4      C3      C8      C7       -123.97(2)     .       .       .       .   no
 C4      C3      C8      C9         56.98(2)     .       .       .       .   no
 N2      C5      C6      C7         54.46(2)     .       .       .       .   no
 C5      C6      C7      C8        -22.75(3)     .       .       .       .   no
 C5      C6      C7      C12       154.33(2)     .       .       .       .   no
 C6      C7      C8      C3         -4.42(3)     .       .       .       .   no
 C6      C7      C8      C9        174.62(2)     .       .       .       .   no
 C12     C7      C8      C3        178.44(2)     .       .       .       .   no
 C12     C7      C8      C9         -2.52(3)     .       .       .       .   no
 C6      C7      C12     C11      -175.41(2)     .       .       .       .   no
 C8      C7      C12     C11         1.73(4)     .       .       .       .   no
 C3      C8      C9      C10      -179.71(2)     .       .       .       .   no
 C7      C8      C9      C10         1.21(4)     .       .       .       .   no
 C8      C9      C10     C11         1.00(4)     .       .       .       .   no
 C9      C10     C11     C12        -1.82(4)     .       .       .       .   no
 C10     C11     C12     C7          0.45(4)     .       .       .       .   no
 O2      C13     C14     C15       109.08(3)     .       .       .       .   no
 O2      C13     C14     C19       -13.91(3)     .       .       .       .   no
 N1      C13     C14     C15       -70.13(3)     .       .       .       .   no
 N1      C13     C14     C19       166.88(2)     .       .       .       .   no
 C13     C14     C15     C16      -178.85(2)     .       .       .       .   no
 C19     C14     C15     C16       -55.47(3)     .       .       .       .   no
 C13     C14     C19     C18      -179.10(2)     .       .       .       .   no
 C15     C14     C19     C18        57.13(3)     .       .       .       .   no
 C14     C15     C16     C17        55.42(3)     .       .       .       .   no
 C15     C16     C17     C18       -56.04(3)     .       .       .       .   no
 C16     C17     C18     C19        57.83(3)     .       .       .       .   no
 C17     C18     C19     C14       -59.07(3)     .       .       .       .   no
 C23     N3      C22     C21        20.66(3)     .       .       .       .   no
 C22     N3      C23     O3        175.66(3)     .       .       .       .   no
 C22     N3      C23     C20        -3.92(3)     .       .       .       .   no
 C23     C20     C21     C22        26.39(2)     .       .       .       .   no
 C21     C20     C23     O3        165.65(3)     .       .       .       .   no
 C21     C20     C23     N3        -14.77(3)     .       .       .       .   no
 C20     C21     C22     N3        -28.12(2)     .       .       .       .   no


                                                        
            
                                          
                                         
                                          
                                          
                                          
                                                                        
                                                                          
                                                                         	
_shelx_hkl_file     
;                   
 0   0   1     853      29      
 0   1   0      43       7      
 0  -1   1     757      28      
 0   1   1     898      30      
 0   0   2     503      22      
 0  -1   2    1153      34      
 0   2   0    3563      60      
 1   0   0    1930      44      
 1   0  -1    1660      41      
 1  -1   0    2030      45      
 0   1   2      22       5      
 0  -2   1    1389      37      
 1  -1  -1    1137      34      
 0   2   1     129      11      
 1  -1   1    1170      34      
 1   0   1      15       4      
 1   0  -2    8002      89      
 1   1  -1    5948      77      
 1   1   0      46       7      
 1  -1  -2     904      30      
 0  -2   2    1078      33      
 1  -2   0    1611      40      
 0   0   3     191      14      
 1  -2  -1    3849      62      
 0  -1   3    2276      48      
 1   1  -2     481      22      
 1  -2   1      56       7      
 1   1   1    1312      36      
 0   2   2    8741      93      
 0   1   3    2247      47      
 1  -1   2    1507      39      
 1   0   2      15       4      
 1   0  -3     387      20      
 1  -2  -2     801      28      
 0   3   0   11179     106      
 1  -1  -3      36       6      
 0  -3   1    2426      49      
 0  -2   3    2161      46      
 1   2  -1   13979     118      
 1  -2   2     518      23      
 1   1  -3     187      14      
 1   2   0   27505     166      
 0   3   1    1906      44      
 1   1   2     653      26      
 1  -3   0     436      21      
 1   2  -2     411      20      
 0  -3   2    2959      54      
 1  -3  -1    3746      61      
 1  -3   1     371      19      
 0   0   4       4       2      
 0   2   3     586      24      
 1   2   1     807      28      
 0  -1   4      11       3      
 1  -2  -3    1856      43      
 1  -1   3    1123      34      
 1   0   3    1738      42      
 1   0  -4       2       1      
 0   3   2    1268      36      
 0   1   4     621      25      
 1  -3  -2      19       4      
 1   2  -3       0       0      
 1  -3   2     661      26      
 1  -2   3      51       7      
 1  -1  -4     137      12      
 0  -3   3     266      16      
 0  -2   4      12       3      
 1   1  -4    4644      68      
 1   2   2   12609     112      
 1   1   3     302      17      
 2  -1  -1     181      13      
 1   3  -1       8       3      
 2  -1   0     198      14      
 2   0  -1      44       7      
 1   3   0     845      29      
 2  -1  -2      69       8      
 0  -4   1     102      10      
 0   4   0     791      28      
 1   3  -2     293      17      
 2   0   0     170      13      
 1  -2  -4     192      14      
 2   0  -2     312      18      
 1  -3  -3      96      10      
 2  -2  -1      17       4      
 1  -4   0     276      17      
 2  -2   0      65       8      
 0   2   4     109      10      
 0   3   3      35       6      
 1   2  -4      31       6      
 1  -3   3    1043      32      
 1  -4   1     981      31      
 2  -1   1     655      26      
 1  -1   4    1078      33      
 1  -4  -1    1073      33      
 0  -4   2      12       3      
 0   4   1    1145      34      
 1   3   1     187      14      
 0   0   5      98      10      
 2  -2  -2      79       9      
 0  -1   5      63       8      
 1   0   4     409      20      
 0  -3   4     452      21      
 2   1  -1      17       4      
 2   0   1     736      27      
 2  -2   1      68       8      
 1   0  -5     272      16      
 2  -1  -3    1119      33      
 1   3  -3    1075      33      
 2   0  -3     302      17      
 1  -2   4     206      14      
 2   1  -2    1051      32      
 2   1   0     925      30      
 1   2   3     555      24      
 1  -4   2      16       4      
 1   1  -5      17       4      
 1  -1  -5     271      16      
 0   1   5     362      19      
 1  -4  -2      51       7      
 0  -2   5      15       4      
 2  -3  -1       9       3      
 2  -3   0     476      22      
 2  -2  -3      32       6      
 0  -4   3     869      29      
 0   4   2     185      14      
 2  -1   2     817      29      
 1   1   4      50       7      
 2   1  -3     189      14      
 1   3   2    1623      40      
 2   1   1     540      23      
 2  -3  -2      37       6      
 1  -3  -4     399      20      
 2  -2   2      43       7      
 2  -3   1      67       8      
 2   0   2     138      12      
 1  -3   4    2416      49      
 2  -1  -4      19       4      
 1   3  -4     191      14      
 2   0  -4     712      27      
 1   2  -5     279      17      
 0   3   4    1031      32      
 1  -2  -5     793      28      
 1  -4   3     700      26      
 2   2  -1      23       5      
 1   4  -1     677      26      
 1  -4  -3     464      22      
 2   2  -2     963      31      
 0   2   5      97      10      
 1   4   0      43       7      
 1   4  -2      92      10      
 2   2   0     574      24      
 0  -3   5     176      13      
 2  -3  -3       8       3      
 1  -1   5      61       8      
 2  -2  -4     196      14      
 2  -3   2       0       0      
 2   1  -4     519      23      
 0  -4   4     404      20      
 0   4   3     609      25      
 1  -5   0      32       6      
 2   1   2      45       7      
 0  -5   1      90       9      
 1   0   5     529      23      
 0   5   0       7       3      
 2   2  -3     601      25      
 1   2   4      26       5      
 2  -1   3     227      15      
 1  -5   1     130      11      
 2  -4   0     600      25      
 0  -1   6    1845      43      
 2  -4  -1    1097      33      
 0   0   6     242      16      
 1  -2   5    2023      45      
 1   0  -6     183      14      
 1   3   3    1018      32      
 1  -5  -1      64       8      
 1   4   1     996      32      
 1   4  -3    1283      36      
 2  -2   3    1860      43      
 2   2   1     385      20      
 0  -5   2     306      17      
 1   1  -6      61       8      
 2   0   3      45       7      
 2  -4   1       0       0      
 0   5   1     802      28      
 1  -1  -6     651      26      
 2  -4  -2       2       1      
 1  -5   2      13       4      
 0  -2   6      31       6      
 2   0  -5       0       1      
 1   3  -5     354      19      
 0   1   6      48       7      
 2  -1  -5    1979      44      
 1  -3  -5     236      15      
 1  -4   4       6       2      
 1   1   5      16       4      
 1  -5  -2    1665      41      
 1  -4  -4      46       7      
 2  -3  -4      29       5      
 2   2  -4     405      20      
 2  -3   3      34       6      
 1  -3   5     198      14      
 0  -5   3      25       5      
 1   2  -6       9       3      
 1   4   2    1300      36      
 2   1  -5     233      15      
 2  -4   2     136      12      
 0   3   5     813      29      
 2   3  -1     429      21      
 1   4  -4     149      12      
 2  -2  -5     103      10      
 2   3  -2      20       5      
 0   5   2       2       2      
 2   1   3     233      15      
 2  -4  -3     288      17      
 2   2   2     635      25      
 1  -2  -6     731      27      
 0  -4   5       0       0      
 0   4   4     443      21      
 1  -5   3     349      19      
 2   3   0     909      30      
 0  -3   6    1618      40      
 2  -1   4     580      24      
 2   3  -3     574      24      
 0   2   6       1       1      
 1   3   4     415      20      
 2  -2   4       4       2      
 1  -5  -3     448      21      
 1  -1   6    3514      59      
 1   2   5     533      23      
 2  -5   0     379      19      
 2   0   4     190      14      
 1   5  -1     249      16      
 2  -5  -1     919      30      
 0  -5   4     298      17      
 2   3   1     437      21      
 2   2  -5    2201      47      
 1   5  -2    1144      34      
 1   0   6     156      12      
 2  -4   3      96      10      
 1  -2   6    1402      37      
 1   5   0     747      27      
 2  -5   1    1536      39      
 2  -3  -5     517      23      
 3  -1  -1      25       5      
 2   0  -6    1154      34      
 1  -4   5     105      10      
 1   3  -6     481      22      
 1   0  -7     106      10      
 1   4   3      10       3      
 2  -1  -6    1948      44      
 3  -1  -2     122      11      
 0   5   3       9       3      
 2  -4  -4      44       7      
 0  -1   7    1127      34      
 2  -3   4       0       0      
 3  -2  -1     325      18      
 1   4  -5     463      22      
 2   3  -4    3260      57      
 2  -5  -2      55       7      
 1  -4  -5      36       6      
 0   0   7     811      28      
 1   1  -7     152      12      
 3  -2  -2     544      23      
 3  -1   0     150      12      
 1  -6   0    1171      34      
 2   2   3     303      17      
 1  -5   4       1       1      
 1  -3  -6    2772      53      
 1  -6   1      43       7      
 3  -2   0      25       5      
 3   0  -1       6       2      
 1   5  -3     199      14      
 3   0  -2      11       3      
 1  -1  -7     157      13      
 2   1  -6     481      22      
 0  -6   1     296      17      
 1   5   1     564      24      
 3  -1  -3      16       4      
 1  -6  -1      23       5      
 0  -2   7      43       7      
 0   6   0       7       3      
 2  -5   2     581      24      
 2   1   4     797      28      
 1   1   6     248      16      
 2  -2  -6     116      11      
 3   0   0       0       0      
 1  -3   6     335      18      
 3  -2  -3    1096      33      
 0   1   7     112      11      
 0  -6   2       4       2      
 3  -3  -1    1314      36      
 1  -6   2       4       2      
 3   0  -3      83       9      
 1  -5  -4      42       6      
 2   3   2     863      29      
 0  -4   6    2101      46      
 0   4   5     932      31      
 1   2  -7     268      16      
 3  -1   1     190      14      
 3  -2   1     527      23      
 3  -3  -2     174      13      
 3  -3   0    1043      32      
 0   3   6     520      23      
 2  -5  -3      11       3      
 0   6   1      75       9      
 2   4  -1    1077      33      
 2   4  -2     986      31      
 0  -5   5      10       3      
 1  -6  -2      77       9      
 1   5  -4     197      14      
 3   1  -2      45       7      
 3   1  -1      76       9      
 2  -1   5      16       4      
 1  -2  -7       4       2      
 2  -4   4      59       8      
 2   3  -5     249      16      
 3  -1  -4     178      13      
 2  -2   5     110      10      
 3   0   1     117      11      
 2   2  -6     615      25      
 1   3   5    1159      34      
 0  -6   3     275      17      
 2   4   0    1476      38      
 1   5   2    3261      57      
 2   4  -3      32       6      
 3  -3  -3     676      26      
 3  -3   1      97      10      
 0  -3   7    1463      38      
 2  -4  -5      46       7      
 0   5   4       4       2      
 3   0  -4     217      15      
 1  -6   3     623      25      
 3   1  -3      20       5      
 2  -5   3     379      19      
 3  -2  -4     345      19      
 3   1   0     767      28      
 2   0   5     328      18      
 1   4   4      80       9      
 2  -3  -6     151      12      
 1   4  -6    1212      35      
 0   2   7      62       8      
 0   6   2       6       2      
 1  -5   5     254      16      
 3  -1   2       1       1      
 3  -2   2     310      18      
 1   2   6      93      10      
 2  -3   5     220      15      
 3  -4  -1      24       5      
 1  -4   6    4623      68      
 2   0  -7      24       5      
 2   2   4     154      12      
 2  -6   0      44       7      
 1   3  -7     199      14      
 3  -4   0      71       8      
 1  -1   7      14       4      
 2   4   1    3711      61      
 2  -1  -7     232      15      
 2  -5  -4     355      19      
 2  -6  -1      66       8      
 3  -4  -2     305      17      
 1  -4  -6      41       6      
 2   3   3    1079      33      
 1  -6  -3       1       1      
 2   4  -4     129      11      
 2  -6   1      71       8      
 3   1  -4     183      14      
 1  -2   7      38       6      
 3   1   1      11       3      
 0  -6   4     536      23      
 2   1  -7      11       3      
 1   0   7     221      15      
 3  -3  -4     342      18      
 3   0   2       0       0      
 3  -3   2      68       8      
 1   5  -5      91      10      
 1  -5  -5       3       2      
 3  -1  -5     859      29      
 3  -4   1      37       6      
 1   0  -8     956      31      
 3   2  -2     105      10      
 2   1   5     317      18      
 2  -6  -2      44       7      
 1  -3  -7     773      28      
 3   2  -1      11       3      
 3   0  -5      10       3      
 1   1  -8       0       0      
 1   6  -1      66       8      
 1  -6   4     351      19      
 1   5   3    1831      43      
 3  -4  -3      32       6      
 2  -2  -7      25       5      
 0  -1   8      48       7      
 3  -2  -5     164      13      
 1   6  -2       0       1      
 2   3  -6       7       3      
 2  -6   2      10       3      
 0   0   8       0       1      
 0  -5   6      81       9      
 3   2  -3      10       3      
 2  -5   4     365      19      
 1   6   0      92      10      
 1  -1  -8     100      10      
 0  -4   7     314      18      
 0   6   3      34       6      
 0   4   6     712      27      
 3   2   0      60       8      
 1  -3   7      62       8      
 2  -4   5      42       6      
 2   4   2    1780      42      
 0  -2   8     652      26      
 1   1   7     254      16      
 3  -2   3      33       6      
 3  -1   3      11       3      
 1   6  -3      99      10      
 2   2  -7      94      10      
 2   4  -5     190      14      
 1   2  -8      97      10      
 2  -4  -6      62       8      
 3   1  -5     338      18      
 1  -7   0     146      12      
 0   5   5     584      24      
 1  -7   1     921      30      
 3   1   2     522      23      
 3  -4   2      88       9      
 0   3   7     134      12      
 2  -6  -3     133      12      
 0   1   8      77       9      
 2  -1   6     323      18      
 2  -2   6     684      26      
 3   2  -4     672      26      
 1  -6  -4     164      13      
 1   6   1     313      18      
 3  -5  -1    2613      51      
 2  -5  -5     429      21      
 1   4   5     282      17      
 3  -3  -5      96      10      
 3  -3   3       1       1      
 1   3   6     246      16      
 3  -4  -4      75       9      
 3  -5   0     313      18      
 1  -7  -1      48       7      
 0  -6   5     110      10      
 2   5  -2      60       8      
 2   5  -1       1       1      
 1   4  -7      32       6      
 0  -7   1     187      14      
 3   0   3     402      20      
 1  -5   6     340      18      
 1  -7   2     265      16      
 3   2   1      26       5      
 2  -6   3     242      16      
 1  -2  -8      59       8      
 3  -5  -2     644      25      
 2  -3  -7       2       1      
 2   3   4     142      12      
 0   7   0      92      10      
 2   0   6     249      16      
 0  -7   2      84       9      
 3  -1  -6     200      14      
 2   2   5     320      18      
 1   5  -6      15       4      
 0  -3   8     205      14      
 1   6  -4    1073      33      
 2   5  -3      86       9      
 2  -3   6     613      25      
 2   5   0     423      21      
 3   0  -6       2       1      
 3  -5   1     150      12      
 1  -6   5     710      27      
 1  -4   7     148      12      
 2   0  -8      22       5      
 1   5   4     101      10      
 3  -2  -6     121      11      
 1  -7  -2     393      20      
 0   7   1     117      11      
 3   3  -2     124      11      
 1   3  -8      24       5      
 1   2   7       1       1      
 3  -5  -3     357      19      
 1  -4  -7      24       5      
 1  -5  -6      26       5      
 2  -1  -8       1       1      
 1  -7   3     242      16      
 3   3  -1       4       2      
 0   6   4      16       4      
 2   4   3     263      16      
 1   6   2    2013      45      
 0  -7   3     262      16      
 3   2  -5      56       7      
 0   2   8     247      16      
 3  -4   3       3       2      
 2  -6  -4      22       5      
 2  -5   5      64       8      
 2   3  -7     205      14      
 2   1  -8     129      11      
 3   3  -3       1       1      
 2   4  -6     208      14      
 2   5  -4       5       2      
 3   1  -6      10       3      
 3   1   3      53       7      
 3  -2   4       5       2      
 2   5   1      28       5      
 1  -1   8      13       4      
 2  -7   0     329      18      
 3   2   2       5       2      
 3  -1   4      17       4      
 2   1   6     393      20      
 3  -5   2      36       6      
 3  -4  -5     770      28      
 0  -5   7     577      24      
 3   3   0       5       2      
 2  -7  -1    2179      47      
 1  -2   8      55       7      
 2  -7   1      17       4      
 2  -6   4      15       4      
 2  -4   6      94      10      
 2  -2  -8     112      11      
 1   0   8     403      20      
 3  -3  -6     407      20      
 1   6  -5     508      23      
 0   7   2      31       6      
 3  -3   4      79       9      
 1  -3  -8      53       7      
 1  -6  -5      82       9      
 3   3  -4       6       2      
 0  -6   6     427      21      
 1  -7  -3       8       3      
 1   0  -9     168      13      
 3  -5  -4      46       7      
 2  -5  -6      92      10      
 0  -4   8       0       0      
 0  -7   4       5       2      
 1   1  -9     550      23      
 3   0   4       3       2      
 2   2  -8     314      18      
 0   4   7       6       2      
 2  -4  -7      69       8      
 2  -7  -2     190      14      
 0   5   6    1136      34      
 1  -7   4       4       2      
 2  -7   2      21       5      
 0  -1   9     167      13      
 1  -3   8     206      14      
 3  -6  -1      76       9      
 3   3   1      38       6      
 2   5  -5     365      19      
 3  -6   0      40       6      
 3  -1  -7     345      19      
 1   6   3     754      27      
 1  -1  -9       6       2      
 0   0   9      60       8      
 1   4   6       1       1      
 3   2  -6     156      12      
 1   5  -7     322      18      
 2   5   2     700      26      
 2   3   5      80       9      
 3   0  -7     228      15      
 1  -5   7      10       3      
 1   1   8      13       4      
 1  -6   6     140      12      
 3  -6  -2       9       3      
 1   4  -8     335      18      
 1   2  -9      59       8      
 2  -1   7     273      17      
 2  -2   7     192      14      
 0  -2   9     157      13      
 3  -5   3     228      15      
 1   7  -1      18       4      
 3  -4   4       6       2      
 2  -6  -5     184      14      
 3  -6   1      38       6      
 0   3   8      14       4      
 1   7  -2     125      11      
 3  -2  -7     147      12      
 1   3   7       0       0      
 3   3  -5     319      18      
 2   4   4     101      10      
 1   5   5      48       7      
 2  -3  -8      70       8      
 3   2   3       4       2      
 2   2   6     314      18      
 0   6   5      59       8      
 2  -7  -3      70       8      
 0   7   3      67       8      

    
;    
    
loop_                           
_pd_proc_point_id               
_pd_meas_2theta_scan            
_pd_proc_intensity_total        
_pd_calc_intensity_total        
_pd_proc_ls_weight              
    
      1     2.00166  7904.79505  8004.24760     0.00012      
      2     2.01035  7899.79006  7987.82570     0.00013      
      3     2.01903  7894.80415  7980.65430     0.00013      
      4     2.02771  7889.83787  7985.47560     0.00013      
      5     2.03640  7884.89128  7952.51860     0.00013      
      6     2.04508  7879.96446  7960.86180     0.00013      
      7     2.05377  7875.05800  7953.35600     0.00013      
      8     2.06245  7870.17201  7932.35010     0.00013      
      9     2.07113  7865.30661  7929.35790     0.00013      
     10     2.07982  7860.46244  7941.71190     0.00013      
     11     2.08850  7855.63966  7911.65380     0.00013      
     12     2.09719  7850.83843  7920.22120     0.00013      
     13     2.10587  7846.05946  7903.02250     0.00013      
     14     2.11455  7841.30297  7893.73000     0.00013      
     15     2.12324  7836.56926  7886.73830     0.00013      
     16     2.13192  7831.85892  7883.04540     0.00013      
     17     2.14061  7827.17243  7864.07130     0.00013      
     18     2.14929  7822.51012  7872.17920     0.00013      
     19     2.15797  7817.87267  7848.16650     0.00013      
     20     2.16666  7813.26064  7849.97120     0.00013      
     21     2.17534  7808.67449  7845.65040     0.00013      
     22     2.18403  7804.11500  7828.79930     0.00013      
     23     2.19271  7799.58287  7823.49220     0.00013      
     24     2.20139  7795.07867  7832.97460     0.00013      
     25     2.21008  7790.60335  7799.98930     0.00013      
     26     2.21876  7786.15775  7806.51900     0.00013      
     27     2.22745  7781.74262  7804.89500     0.00013      
     28     2.23613  7777.35910  7786.08500     0.00013      
     29     2.24481  7773.00824  7786.12060     0.00013      
     30     2.25350  7768.69100  7783.52980     0.00013      
     31     2.26218  7764.40877  7760.86470     0.00013      
     32     2.27087  7760.16286  7769.47850     0.00013      
     33     2.27955  7755.95454  7754.65330     0.00013      
     34     2.28823  7751.78551  7753.77690     0.00013      
     35     2.29692  7747.65742  7749.49320     0.00013      
     36     2.30560  7743.57196  7733.64940     0.00013      
     37     2.31429  7739.53122  7728.21880     0.00013      
     38     2.32297  7735.55991  7737.57860     0.00013      
     39     2.33165  7731.70892  7712.11230     0.00013      
     40     2.34034  7727.81641  7717.31250     0.00013      
     41     2.34902  7723.97844  7713.63090     0.00013      
     42     2.35771  7720.19794  7697.09670     0.00013      
     43     2.36639  7716.47838  7694.87600     0.00013      
     44     2.37507  7712.82344  7703.48390     0.00013      
     45     2.38376  7709.23705  7676.49760     0.00013      
     46     2.39244  7705.72383  7687.86130     0.00013      
     47     2.40113  7702.28860  7676.74170     0.00013      
     48     2.40981  7698.93682  7671.39890     0.00013      
     49     2.41849  7695.67466  7662.89840     0.00013      
     50     2.42718  7692.50876  7660.18510     0.00013      
     51     2.43586  7689.44663  7649.81540     0.00013      
     52     2.44455  7686.49677  7661.75100     0.00013      
     53     2.45323  7683.66847  7640.13960     0.00013      
     54     2.46191  7680.97231  7637.33590     0.00013      
     55     2.47060  7678.42026  7633.06100     0.00013      
     56     2.47928  7676.02566  7624.21440     0.00013      
     57     2.48797  7673.80373  7621.20950     0.00013      
     58     2.49665  7671.77183  7636.54350     0.00013      
     59     2.50533  7669.94960  7605.11720     0.00013      
     60     2.51402  7668.35958  7615.67970     0.00013      
     61     2.52270  7667.02772  7611.01660     0.00013      
     62     2.53139  7665.98382  7598.42770     0.00013      
     63     2.54007  7665.26245  7596.59720     0.00013      
     64     2.54875  7664.90378  7599.34180     0.00013      
     65     2.55744  7664.95471  7580.25630     0.00013      
     66     2.56612  7665.47032  7597.25150     0.00013      
     67     2.57481  7666.51553  7582.41110     0.00013      
     68     2.58349  7668.16742  7583.37260     0.00013      
     69     2.59217  7670.51791  7584.76270     0.00013      
     70     2.60086  7673.67752  7577.06450     0.00013      
     71     2.60954  7677.77964  7578.30710     0.00013      
     72     2.61823  7682.98683  7591.11040     0.00013      
     73     2.62691  7689.49880  7570.88280     0.00013      
     74     2.63559  7697.56234  7578.80370     0.00013      
     75     2.64428  7707.48587  7586.01610     0.00013      
     76     2.65296  7719.65886  7579.16850     0.00013      
     77     2.66165  7734.57707  7590.39400     0.00013      
     78     2.67033  7752.88047  7606.82710     0.00013      
     79     2.67901  7775.40713  7594.37450     0.00013      
     80     2.68770  7803.27238  7624.95510     0.00013      
     81     2.69638  7838.02641  7634.55710     0.00013      
     82     2.70507  7882.04895  7657.93990     0.00013      
     83     2.71375  7939.86291  7691.69240     0.00013      
     84     2.72243  8022.63396  7759.74320     0.00013      
     85     2.73112  8161.70864  7921.62110     0.00013      
     86     2.73980  8442.06231  8361.49410     0.00012      
     87     2.74849  9068.83496  9341.30960     0.00011      
     88     2.75717 10454.03453 11137.21000     0.00009      
     89     2.76585 13254.45802 13888.21700     0.00007      
     90     2.77454 18221.31393 18487.14300     0.00005      
     91     2.78322 25753.07598 24909.27300     0.00004      
     92     2.79191 35270.05817 33917.87100     0.00003      
     93     2.80059 44821.78286 43745.77000     0.00002      
     94     2.80927 51382.80685 51162.52300     0.00002      
     95     2.81796 52204.25178 52660.05500     0.00002      
     96     2.82664 46893.24392 48067.78900     0.00002      
     97     2.83533 37782.85311 39980.48400     0.00003      
     98     2.84401 28007.75031 30348.06100     0.00003      
     99     2.85269 19856.37225 21953.69300     0.00005      
    100     2.86138 14240.09746 16107.78800     0.00006      
    101     2.87006 10949.97385 12321.73400     0.00008      
    102     2.87875  9269.60496  9893.06050     0.00010      
    103     2.88743  8492.53304  8675.03320     0.00012      
    104     2.89611  8143.31735  8006.98970     0.00012      
    105     2.90480  7972.60429  7725.54440     0.00013      
    106     2.91348  7872.46794  7624.72560     0.00013      
    107     2.92217  7802.35477  7545.16310     0.00013      
    108     2.93085  7748.01321  7520.87450     0.00013      
    109     2.93953  7703.67769  7497.86770     0.00013      
    110     2.94822  7666.73066  7470.18990     0.00013      
    111     2.95690  7635.54554  7459.94780     0.00013      
    112     2.96559  7608.77235  7456.09230     0.00013      
    113     2.97427  7585.56930  7426.43850     0.00013      
    114     2.98295  7565.26286  7429.58540     0.00013      
    115     2.99164  7547.32436  7417.29150     0.00013      
    116     3.00032  7531.34218  7412.24170     0.00013      
    117     3.00901  7516.98940  7412.31790     0.00013      
    118     3.01769  7504.00517  7409.12160     0.00013      
    119     3.02637  7492.18065  7399.79200     0.00014      
    120     3.03506  7481.34506  7401.73930     0.00014      
    121     3.04374  7471.35871  7372.03270     0.00014      
    122     3.05243  7462.10752  7375.49900     0.00014      
    123     3.06111  7453.49600  7374.05760     0.00014      
    124     3.06979  7445.44464  7358.33300     0.00014      
    125     3.07848  7437.88769  7351.36080     0.00014      
    126     3.08716  7430.76919  7359.77690     0.00014      
    127     3.09585  7424.04205  7334.65580     0.00014      
    128     3.10453  7417.66729  7344.70410     0.00014      
    129     3.11321  7411.61147  7333.20510     0.00014      
    130     3.12190  7405.84662  7327.40720     0.00014      
    131     3.13058  7400.35004  7330.25440     0.00014      
    132     3.13927  7395.10266  7329.79740     0.00014      
    133     3.14795  7390.08929  7321.12740     0.00014      
    134     3.15663  7385.29890  7329.04150     0.00014      
    135     3.16532  7380.72347  7312.15230     0.00014      
    136     3.17400  7376.35869  7315.10250     0.00014      
    137     3.18269  7372.20458  7314.77930     0.00014      
    138     3.19137  7368.26508  7303.96290     0.00014      
    139     3.20005  7364.54928  7302.10210     0.00014      
    140     3.20874  7361.07293  7308.16020     0.00014      
    141     3.21742  7357.85934  7289.80710     0.00014      
    142     3.22611  7354.94240  7306.93510     0.00014      
    143     3.23479  7352.37112  7307.58110     0.00014      
    144     3.24347  7350.21817  7299.45750     0.00014      
    145     3.25216  7348.60584  7301.87350     0.00014      
    146     3.26084  7347.78781  7305.39840     0.00014      
    147     3.26953  7348.39820  7295.81840     0.00014      
    148     3.27821  7352.11203  7313.48540     0.00014      
    149     3.28689  7363.06741  7319.20750     0.00014      
    150     3.29558  7390.17190  7357.77980     0.00014      
    151     3.30426  7449.33771  7410.25490     0.00013      
    152     3.31295  7562.76043  7496.82080     0.00013      
    153     3.32163  7751.32713  7624.78220     0.00013      
    154     3.33031  8019.04735  7813.80220     0.00013      
    155     3.33900  8335.69429  8022.44820     0.00012      
    156     3.34768  8629.52769  8257.96480     0.00012      
    157     3.35637  8801.38396  8388.19820     0.00012      
    158     3.36505  8774.86821  8378.63770     0.00012      
    159     3.37373  8561.01759  8247.26860     0.00012      
    160     3.38242  8247.55211  8027.38380     0.00012      
    161     3.39110  7930.46237  7773.01560     0.00013      
    162     3.39979  7672.57828  7590.89160     0.00013      
    163     3.40847  7495.36272  7454.79590     0.00013      
    164     3.41715  7389.48464  7364.31350     0.00014      
    165     3.42584  7332.64700  7313.49660     0.00014      
    166     3.43452  7303.67325  7280.32520     0.00014      
    167     3.44321  7288.30399  7261.33110     0.00014      
    168     3.45189  7278.90860  7261.91850     0.00014      
    169     3.46057  7272.06339  7241.52340     0.00014      
    170     3.46926  7266.41177  7245.01510     0.00014      
    171     3.47794  7261.43697  7242.69580     0.00014      
    172     3.48663  7256.92258  7238.13180     0.00014      
    173     3.49531  7252.75634  7238.62210     0.00014      
    174     3.50399  7248.86610  7245.15970     0.00014      
    175     3.51268  7245.20034  7224.67330     0.00014      
    176     3.52136  7241.72087  7233.48390     0.00014      
    177     3.53005  7238.47214  7227.00680     0.00014      
    178     3.53873  7235.28368  7221.93120     0.00014      
    179     3.54741  7232.21158  7223.60600     0.00014      
    180     3.55610  7229.24170  7225.42820     0.00014      
    181     3.56478  7226.36367  7220.28370     0.00014      
    182     3.57347  7223.56693  7227.73540     0.00014      
    183     3.58215  7220.84509  7215.83200     0.00014      
    184     3.59083  7218.19226  7223.08690     0.00014      
    185     3.59952  7215.60394  7223.65720     0.00014      
    186     3.60820  7213.07626  7221.40230     0.00014      
    187     3.61689  7210.60613  7218.05810     0.00014      
    188     3.62557  7208.19131  7225.08690     0.00014      
    189     3.63425  7205.82988  7208.80220     0.00014      
    190     3.64294  7203.52035  7220.14360     0.00014      
    191     3.65162  7201.66413  7221.41500     0.00014      
    192     3.66031  7199.54036  7215.39010     0.00014      
    193     3.66899  7197.38416  7217.91990     0.00014      
    194     3.67767  7195.27804  7245.39990     0.00014      
    195     3.68636  7193.22219  7252.15720     0.00014      
    196     3.69504  7191.21706  7262.09770     0.00014      
    197     3.70373  7189.26361  7242.83940     0.00014      
    198     3.71241  7187.36283  7239.20070     0.00014      
    199     3.72109  7185.51601  7248.64210     0.00014      
    200     3.72978  7183.72491  7246.67820     0.00014      
    201     3.73846  7181.99139  7241.40140     0.00014      
    202     3.74715  7180.31768  7233.55910     0.00014      
    203     3.75583  7178.70650  7210.48730     0.00014      
    204     3.76451  7177.16080  7202.13480     0.00014      
    205     3.77320  7175.68398  7198.91600     0.00014      
    206     3.78188  7174.28006  7189.75290     0.00014      
    207     3.79057  7173.29687  7190.12160     0.00014      
    208     3.79925  7172.05510  7196.74660     0.00014      
    209     3.80793  7170.90043  7184.47070     0.00014      
    210     3.81662  7169.84052  7194.12790     0.00014      
    211     3.82530  7168.88286  7185.19090     0.00014      
    212     3.83399  7168.03605  7181.09330     0.00014      
    213     3.84267  7167.30991  7181.10990     0.00014      
    214     3.85135  7166.71572  7183.52340     0.00014      
    215     3.86004  7166.26909  7183.36430     0.00014      
    216     3.86872  7165.97985  7191.82280     0.00014      
    217     3.87741  7165.86804  7181.89360     0.00014      
    218     3.88609  7165.95397  7186.18310     0.00014      
    219     3.89477  7166.26143  7189.18750     0.00014      
    220     3.90346  7166.81840  7182.64840     0.00014      
    221     3.91214  7167.65809  7183.91160     0.00014      
    222     3.92083  7168.86939  7190.29200     0.00014      
    223     3.92951  7170.40636  7175.54830     0.00014      
    224     3.93819  7172.36393  7187.76030     0.00014      
    225     3.94688  7174.81329  7188.30760     0.00014      
    226     3.95556  7177.85594  7186.74370     0.00014      
    227     3.96425  7181.60580  7192.56350     0.00014      
    228     3.97293  7186.12021  7194.13480     0.00014      
    229     3.98161  7191.60193  7189.01950     0.00014      
    230     3.99030  7198.25274  7199.44090     0.00014      
    231     3.99898  7206.33094  7194.51460     0.00014      
    232     4.00767  7216.17144  7205.59380     0.00014      
    233     4.01635  7228.21335  7210.01900     0.00014      
    234     4.02503  7243.05169  7214.17040     0.00014      
    235     4.03372  7261.53617  7227.76610     0.00014      
    236     4.04240  7285.06969  7255.03220     0.00014      
    237     4.05109  7316.58603  7270.88430     0.00014      
    238     4.05977  7363.66873  7332.38180     0.00014      
    239     4.06845  7446.39752  7455.59670     0.00013      
    240     4.07714  7615.72838  7731.61130     0.00013      
    241     4.08582  7982.12334  8250.41890     0.00012      
    242     4.09451  8743.38813  9176.76660     0.00011      
    243     4.10319 10173.78701 10613.73700     0.00009      
    244     4.11187 12523.55039 12868.20000     0.00008      
    245     4.12056 15818.88697 16074.34600     0.00006      
    246     4.12924 19649.75733 20149.62300     0.00005      
    247     4.13793 23099.59475 23685.39800     0.00004      
    248     4.14661 24965.98884 25933.38900     0.00004      
    249     4.15529 24417.39794 25841.85700     0.00004      
    250     4.16398 21712.44795 23341.41800     0.00004      
    251     4.17266 17953.34717 19298.22900     0.00005      
    252     4.18135 14269.90453 15236.46100     0.00007      
    253     4.19003 11364.65752 12248.84300     0.00008      
    254     4.19871  9436.64498 10068.42800     0.00010      
    255     4.20740  8332.71667  8802.33790     0.00011      
    256     4.21608  7772.67398  8036.76460     0.00012      
    257     4.22477  7509.55280  7602.96480     0.00013      
    258     4.23345  7385.73274  7404.39700     0.00014      
    259     4.24213  7320.86232  7312.33540     0.00014      
    260     4.25082  7280.45982  7267.33060     0.00014      
    261     4.25950  7251.38127  7246.11430     0.00014      
    262     4.26819  7228.74916  7231.31640     0.00014      
    263     4.27687  7210.70305  7219.51610     0.00014      
    264     4.28555  7195.77112  7217.03130     0.00014      
    265     4.29424  7183.43506  7199.33110     0.00014      
    266     4.30292  7173.18751  7198.78420     0.00014      
    267     4.31161  7164.65032  7194.47750     0.00014      
    268     4.32029  7157.59906  7188.81490     0.00014      
    269     4.32897  7151.75213  7190.92870     0.00014      
    270     4.33766  7146.90101  7196.05710     0.00014      
    271     4.34634  7142.97483  7195.40480     0.00014      
    272     4.35503  7139.88303  7210.15280     0.00014      
    273     4.36371  7137.56125  7212.24800     0.00014      
    274     4.37239  7135.96815  7201.95460     0.00014      
    275     4.38108  7135.08256  7196.41460     0.00014      
    276     4.38976  7135.26765  7197.16110     0.00014      
    277     4.39845  7135.81005  7194.94530     0.00014      
    278     4.40713  7137.11045  7201.97120     0.00014      
    279     4.41581  7139.22715  7192.13480     0.00014      
    280     4.42450  7142.24369  7196.91500     0.00014      
    281     4.43318  7146.27380  7199.04980     0.00014      
    282     4.44187  7151.46992  7199.87010     0.00014      
    283     4.45055  7158.03253  7206.50680     0.00014      
    284     4.45923  7166.22527  7218.27150     0.00014      
    285     4.46792  7176.42084  7214.27150     0.00014      
    286     4.47660  7189.04202  7231.49800     0.00014      
    287     4.48529  7204.75445  7244.28470     0.00014      
    288     4.49397  7224.51824  7257.70800     0.00014      
    289     4.50265  7250.02292  7291.16160     0.00014      
    290     4.51134  7285.03657  7348.79640     0.00014      
    291     4.52002  7339.41351  7464.63670     0.00013      
    292     4.52871  7439.11144  7677.52540     0.00013      
    293     4.53739  7646.16273  8083.59910     0.00012      
    294     4.54607  8087.25126  8762.87600     0.00011      
    295     4.55476  8972.76686  9804.81250     0.00010      
    296     4.56344 10565.82961 11424.06000     0.00009      
    297     4.57213 13060.57314 13640.92100     0.00007      
    298     4.58081 16381.80887 16420.19700     0.00006      
    299     4.58949 20011.54813 19438.72700     0.00005      
    300     4.59818 22984.25998 21718.37900     0.00005      
    301     4.60686 24184.26848 22463.65600     0.00004      
    302     4.61555 23057.90140 21434.39600     0.00005      
    303     4.62423 20125.81326 19303.01000     0.00005      
    304     4.63291 16498.51088 16523.19900     0.00006      
    305     4.64160 13154.43427 13793.70200     0.00007      
    306     4.65028 10627.25417 11565.46900     0.00009      
    307     4.65897  9004.91569  9888.40140     0.00010      
    308     4.66765  8098.87294  8698.52830     0.00011      
    309     4.67633  7645.53134  8002.47020     0.00012      
    310     4.68502  7431.82105  7592.88570     0.00013      
    311     4.69370  7328.81409  7384.46390     0.00014      
    312     4.70239  7272.02222  7292.74270     0.00014      
    313     4.71107  7235.06111  7239.66600     0.00014      
    314     4.71975  7207.75330  7219.57130     0.00014      
    315     4.72844  7186.20635  7209.46190     0.00014      
    316     4.73712  7168.68799  7188.65190     0.00014      
    317     4.74581  7154.21346  7184.21630     0.00014      
    318     4.75449  7142.12196  7180.80620     0.00014      
    319     4.76317  7131.93081  7167.60740     0.00014      
    320     4.77186  7123.27541  7172.41940     0.00014      
    321     4.78054  7115.87396  7172.34860     0.00014      
    322     4.78923  7109.50798  7180.99850     0.00014      
    323     4.79791  7104.00538  7186.10010     0.00014      
    324     4.80659  7099.22827  7185.19870     0.00014      
    325     4.81528  7095.06648  7180.56100     0.00014      
    326     4.82396  7091.43077  7184.69920     0.00014      
    327     4.83265  7088.24758  7176.72850     0.00014      
    328     4.84133  7085.45678  7177.25540     0.00014      
    329     4.85001  7083.03184  7176.54980     0.00014      
    330     4.85870  7080.95453  7168.38920     0.00014      
    331     4.86738  7079.07287  7172.29050     0.00014      
    332     4.87607  7077.44339  7176.78520     0.00014      
    333     4.88475  7076.06728  7170.80080     0.00014      
    334     4.89343  7074.82225  7177.24120     0.00014      
    335     4.90212  7073.74834  7178.31400     0.00014      
    336     4.91080  7072.82959  7172.12840     0.00014      
    337     4.91949  7072.05237  7172.13280     0.00014      
    338     4.92817  7071.40484  7167.49850     0.00014      
    339     4.93685  7070.87660  7166.92190     0.00014      
    340     4.94554  7070.45866  7172.24950     0.00014      
    341     4.95422  7070.14312  7169.45510     0.00014      
    342     4.96291  7069.92300  7170.44970     0.00014      
    343     4.97159  7069.79220  7173.84770     0.00014      
    344     4.98027  7069.74532  7167.47850     0.00014      
    345     4.98896  7069.77772  7172.14700     0.00014      
    346     4.99764  7069.88541  7177.01810     0.00014      
    347     5.00633  7070.06378  7167.85790     0.00014      
    348     5.01501  7070.31001  7173.39060     0.00014      
    349     5.02369  7070.62114  7178.48880     0.00014      
    350     5.03238  7070.99451  7173.08450     0.00014      
    351     5.04106  7071.42785  7177.39400     0.00014      
    352     5.04975  7071.91906  7176.43210     0.00014      
    353     5.05843  7072.46627  7174.83690     0.00014      
    354     5.06711  7073.06793  7181.53030     0.00014      
    355     5.07580  7073.72316  7179.41650     0.00014      
    356     5.08448  7074.43329  7180.00490     0.00014      
    357     5.09317  7075.19033  7181.60940     0.00014      
    358     5.10185  7075.99709  7174.43950     0.00014      
    359     5.11053  7076.85270  7179.38920     0.00014      
    360     5.11922  7077.77154  7182.85940     0.00014      
    361     5.12790  7078.72319  7174.23580     0.00014      
    362     5.13659  7079.72203  7176.44340     0.00014      
    363     5.14527  7080.76788  7179.20070     0.00014      
    364     5.15395  7081.86048  7172.34720     0.00014      
    365     5.16264  7083.03015  7180.15190     0.00014      
    366     5.17132  7084.21616  7182.56200     0.00014      
    367     5.18001  7085.44895  7180.29200     0.00014      
    368     5.18869  7086.72866  7184.66020     0.00014      
    369     5.19737  7088.05582  7184.57620     0.00014      
    370     5.20606  7089.43080  7186.50590     0.00014      
    371     5.21474  7090.85415  7194.56880     0.00014      
    372     5.22343  7092.32673  7189.40770     0.00014      
    373     5.23211  7093.84934  7195.01710     0.00014      
    374     5.24079  7095.42296  7196.67530     0.00014      
    375     5.24948  7097.04895  7191.35160     0.00014      
    376     5.25816  7098.72861  7195.09570     0.00014      
    377     5.26685  7100.46350  7198.42770     0.00014      
    378     5.27553  7102.25566  7190.56590     0.00014      
    379     5.28421  7104.10710  7195.98730     0.00014      
    380     5.29290  7106.02018  7198.46040     0.00014      
    381     5.30158  7107.99821  7197.56540     0.00014      
    382     5.31027  7110.04367  7204.60640     0.00014      
    383     5.31895  7112.16039  7206.63380     0.00014      
    384     5.32763  7114.35283  7206.74460     0.00014      
    385     5.33632  7116.62569  7212.18210     0.00014      
    386     5.34500  7118.98449  7207.40480     0.00014      
    387     5.35369  7121.43595  7210.47900     0.00014      
    388     5.36237  7123.98742  7211.91110     0.00014      
    389     5.37105  7126.64760  7208.83640     0.00014      
    390     5.37974  7129.42705  7211.95950     0.00014      
    391     5.38842  7132.33768  7219.30370     0.00014      
    392     5.39711  7135.39370  7212.76270     0.00014      
    393     5.40579  7138.61247  7223.25880     0.00014      
    394     5.41447  7142.01496  7225.82030     0.00014      
    395     5.42316  7145.62444  7221.67630     0.00014      
    396     5.43184  7149.47090  7224.09570     0.00014      
    397     5.44053  7153.59093  7225.48190     0.00014      
    398     5.44921  7158.02913  7226.19140     0.00014      
    399     5.45789  7162.84158  7232.06150     0.00014      
    400     5.46658  7168.18292  7227.90380     0.00014      
    401     5.47526  7173.97117  7233.53220     0.00014      
    402     5.48395  7180.40506  7240.05960     0.00014      
    403     5.49263  7187.63107  7241.34520     0.00014      
    404     5.50131  7195.91445  7246.32470     0.00014      
    405     5.51000  7205.38247  7255.22660     0.00014      
    406     5.51868  7216.49179  7250.38960     0.00014      
    407     5.52737  7229.93517  7262.71440     0.00014      
    408     5.53605  7247.22771  7271.27880     0.00014      
    409     5.54473  7272.21525  7284.65670     0.00014      
    410     5.55342  7314.73103  7324.88430     0.00014      
    411     5.56210  7397.66023  7406.42720     0.00014      
    412     5.57079  7566.65134  7551.69140     0.00013      
    413     5.57947  7896.13548  7802.61770     0.00013      
    414     5.58815  8478.11110  8175.03520     0.00012      
    415     5.59684  9380.09059  8780.22070     0.00011      
    416     5.60552 10577.86025  9551.14260     0.00010      
    417     5.61421 11894.22885 10551.19800     0.00009      
    418     5.62289 12994.70644 11358.77200     0.00009      
    419     5.63157 13479.27309 11655.98900     0.00009      
    420     5.64026 13128.46905 11283.00500     0.00009      
    421     5.64894 12106.31317 10511.48600     0.00010      
    422     5.65763 10804.34950  9675.76760     0.00010      
    423     5.66631  9577.57613  8878.95020     0.00011      
    424     5.67499  8629.30481  8331.14650     0.00012      
    425     5.68368  8005.26680  7929.00680     0.00013      
    426     5.69236  7647.69506  7649.37550     0.00013      
    427     5.70105  7464.82409  7483.47270     0.00013      
    428     5.70973  7377.96649  7391.51900     0.00014      
    429     5.71841  7337.01580  7349.27290     0.00014      
    430     5.72710  7316.14067  7334.22410     0.00014      
    431     5.73578  7304.68649  7324.72660     0.00014      
    432     5.74447  7297.00201  7325.61380     0.00014      
    433     5.75315  7291.62593  7336.15140     0.00014      
    434     5.76183  7287.99454  7329.55080     0.00014      
    435     5.77052  7285.68509  7336.36230     0.00014      
    436     5.77920  7284.41897  7334.03910     0.00014      
    437     5.78789  7283.99458  7324.77050     0.00014      
    438     5.79657  7284.26043  7329.59230     0.00014      
    439     5.80525  7285.10069  7332.68600     0.00014      
    440     5.81394  7286.42562  7330.23540     0.00014      
    441     5.82262  7288.16533  7336.41260     0.00014      
    442     5.83131  7290.26469  7332.67680     0.00014      
    443     5.83999  7292.67997  7334.80660     0.00014      
    444     5.84867  7295.37684  7338.22510     0.00014      
    445     5.85736  7298.32775  7337.05710     0.00014      
    446     5.86604  7301.51075  7341.13530     0.00014      
    447     5.87473  7304.90908  7346.77250     0.00014      
    448     5.88341  7308.50944  7344.22020     0.00014      
    449     5.89209  7312.30923  7351.67820     0.00014      
    450     5.90078  7316.28666  7356.98540     0.00014      
    451     5.90946  7320.44489  7356.93700     0.00014      
    452     5.91815  7324.77991  7364.19580     0.00014      
    453     5.92683  7329.36392  7376.82760     0.00014      
    454     5.93551  7334.05611  7378.11570     0.00014      
    455     5.94420  7338.93094  7389.43550     0.00014      
    456     5.95288  7343.99471  7379.84420     0.00014      
    457     5.96157  7349.25460  7374.75200     0.00014      
    458     5.97025  7354.33738  7375.54050     0.00014      
    459     5.97893  7359.95990  7379.96780     0.00014      
    460     5.98762  7365.90608  7392.25440     0.00014      
    461     5.99630  7372.09496  7403.89110     0.00014      
    462     6.00499  7378.56164  7412.23140     0.00013      
    463     6.01367  7385.33020  7428.74760     0.00013      
    464     6.02235  7392.44034  7432.51120     0.00013      
    465     6.03104  7399.93443  7439.83010     0.00013      
    466     6.03972  7407.86277  7449.85060     0.00013      
    467     6.04841  7416.28644  7462.80370     0.00013      
    468     6.05709  7425.28203  7473.99020     0.00013      
    469     6.06577  7434.94289  7478.80080     0.00013      
    470     6.07446  7445.39438  7480.08790     0.00013      
    471     6.08314  7456.76853  7480.72510     0.00013      
    472     6.09183  7469.25499  7483.55420     0.00013      
    473     6.10051  7483.09541  7486.71340     0.00013      
    474     6.10919  7498.60340  7489.20510     0.00013      
    475     6.11788  7516.19438  7497.75000     0.00013      
    476     6.12656  7536.44638  7524.84180     0.00013      
    477     6.13525  7560.27535  7550.46240     0.00013      
    478     6.14393  7589.40918  7572.60600     0.00013      
    479     6.15261  7627.61704  7588.84960     0.00013      
    480     6.16130  7684.88088  7628.32420     0.00013      
    481     6.16998  7785.55883  7732.80080     0.00013      
    482     6.17867  7983.02361  7965.17380     0.00013      
    483     6.18735  8376.39803  8397.33500     0.00012      
    484     6.19603  9113.67184  9120.37010     0.00011      
    485     6.20472 10355.47496 10318.03200     0.00010      
    486     6.21340 12183.71271 11969.84200     0.00008      
    487     6.22209 14478.74503 14301.46800     0.00007      
    488     6.23077 16834.91402 16897.02700     0.00006      
    489     6.23945 18588.38562 18710.23600     0.00005      
    490     6.24814 19053.88451 19179.57600     0.00005      
    491     6.25682 18017.53051 18029.04100     0.00006      
    492     6.26551 15944.30330 15869.53400     0.00006      
    493     6.27419 13559.33344 13244.51300     0.00008      
    494     6.28287 11435.87856 11213.30900     0.00009      
    495     6.29156  9859.05319  9855.08980     0.00010      
    496     6.30024  8852.97221  8894.24610     0.00011      
    497     6.30893  8289.74397  8310.94240     0.00012      
    498     6.31761  8005.84309  7967.09280     0.00013      
    499     6.32629  7871.57030  7765.19430     0.00013      
    500     6.33498  7808.00978  7678.81930     0.00013      
    501     6.34366  7775.61163  7637.38720     0.00013      
    502     6.35235  7757.31515  7624.50730     0.00013      
    503     6.36103  7746.37127  7619.99710     0.00013      
    504     6.36971  7740.08152  7611.04690     0.00013      
    505     6.37840  7737.20399  7612.55910     0.00013      
    506     6.38708  7737.03283  7617.48100     0.00013      
    507     6.39577  7739.10277  7614.13180     0.00013      
    508     6.40445  7743.09816  7625.48540     0.00013      
    509     6.41313  7748.75447  7628.12890     0.00013      
    510     6.42182  7755.92208  7629.05570     0.00013      
    511     6.43050  7764.48899  7634.69630     0.00013      
    512     6.43919  7774.38603  7638.97750     0.00013      
    513     6.44787  7785.60443  7643.44140     0.00013      
    514     6.45655  7798.09924  7654.73680     0.00013      
    515     6.46524  7811.91968  7656.77730     0.00013      
    516     6.47392  7827.12503  7669.94530     0.00013      
    517     6.48261  7843.80051  7676.88960     0.00013      
    518     6.49129  7862.06182  7682.46530     0.00013      
    519     6.49997  7882.06287  7694.97950     0.00013      
    520     6.50866  7903.99330  7709.57180     0.00013      
    521     6.51734  7928.08880  7713.15580     0.00013      
    522     6.52603  7954.64615  7727.82910     0.00013      
    523     6.53471  7984.07532  7742.65140     0.00013      
    524     6.54339  8016.72470  7755.14940     0.00013      
    525     6.55208  8053.20381  7776.49270     0.00013      
    526     6.56076  8094.20775  7793.70610     0.00013      
    527     6.56945  8140.61166  7816.38280     0.00013      
    528     6.57813  8193.54070  7847.35550     0.00013      
    529     6.58681  8254.43742  7876.04100     0.00013      
    530     6.59550  8325.21777  7921.16360     0.00013      
    531     6.60418  8408.61270  7971.56790     0.00013      
    532     6.61287  8508.79798  8035.32520     0.00012      
    533     6.62155  8633.69320  8133.57710     0.00012      
    534     6.63023  8800.32691  8278.54200     0.00012      
    535     6.63892  9047.20111  8534.01370     0.00012      
    536     6.64760  9457.41278  9026.02340     0.00011      
    537     6.65629 10191.48804  9873.30660     0.00010      
    538     6.66497 11514.57500 11453.12500     0.00009      
    539     6.67365 13784.07608 13721.42700     0.00007      
    540     6.68234 17358.77138 17215.11300     0.00006      
    541     6.69102 22421.33925 22271.30900     0.00004      
    542     6.69971 28771.05191 28692.61900     0.00003      
    543     6.70839 35666.91003 35855.77000     0.00003      
    544     6.71707 41800.01270 42653.07000     0.00002      
    545     6.72576 45706.81881 46444.35200     0.00002      
    546     6.73444 46778.64330 47318.87500     0.00002      
    547     6.74313 45532.36456 45905.27000     0.00002      
    548     6.75181 42687.62960 42911.15600     0.00002      
    549     6.76049 38813.62803 38797.54300     0.00003      
    550     6.76918 34698.00760 34577.80500     0.00003      
    551     6.77786 31166.89862 31276.44100     0.00003      
    552     6.78655 28573.59768 28810.10900     0.00003      
    553     6.79523 26722.58717 27238.90600     0.00004      
    554     6.80391 25250.97226 25697.54100     0.00004      
    555     6.81260 24162.67281 24044.30900     0.00004      
    556     6.82128 23820.29880 23309.75400     0.00004      
    557     6.82997 24450.49315 24041.25600     0.00004      
    558     6.83865 25806.30223 26222.85200     0.00004      
    559     6.84733 27115.77063 28343.14500     0.00004      
    560     6.85602 27319.60760 28982.42200     0.00003      
    561     6.86470 25737.97708 27303.24600     0.00004      
    562     6.87338 22661.94239 23723.07800     0.00004      
    563     6.88207 18996.09572 19239.67400     0.00005      
    564     6.89075 15588.49618 15512.96800     0.00006      
    565     6.89944 12935.46353 12955.02100     0.00008      
    566     6.90812 11157.15777 11108.10400     0.00009      
    567     6.91681 10118.14604 10011.35900     0.00010      
    568     6.92549  9595.40153  9389.47270     0.00011      
    569     6.93417  9407.34068  9159.62210     0.00011      
    570     6.94286  9473.90228  9326.90820     0.00011      
    571     6.95154  9824.75142  9888.81050     0.00010      
    572     6.96023 10575.64392 10922.78100     0.00009      
    573     6.96891 11871.76657 12393.25500     0.00008      
    574     6.97759 13796.12987 14715.75200     0.00007      
    575     6.98628 16268.54091 17683.52500     0.00006      
    576     6.99496 18979.92005 20796.81800     0.00005      
    577     7.00364 21406.71132 23463.79100     0.00004      
    578     7.01233 22999.87328 24656.65200     0.00004      
    579     7.02101 23560.03628 24294.02500     0.00004      
    580     7.02970 23271.56613 22813.38900     0.00004      
    581     7.03838 22292.58354 21032.92000     0.00005      
    582     7.04707 20611.68176 18927.73800     0.00005      
    583     7.05575 18333.38803 16529.57600     0.00006      
    584     7.06443 15833.77567 14238.95000     0.00007      
    585     7.07312 13527.42003 12197.28600     0.00008      
    586     7.08180 11678.15870 10627.14700     0.00009      
    587     7.09049 10370.58477  9672.28420     0.00010      
    588     7.09917  9547.93607  9048.84280     0.00011      
    589     7.10785  9080.40658  8666.77050     0.00012      
    590     7.11654  8833.12407  8454.71090     0.00012      
    591     7.12522  8704.91969  8326.21090     0.00012      
    592     7.13390  8634.94556  8269.69140     0.00012      
    593     7.14259  8592.38548  8245.64550     0.00012      
    594     7.15127  8563.50247  8224.79980     0.00012      
    595     7.15996  8542.52247  8222.11130     0.00012      
    596     7.16864  8526.89664  8215.00780     0.00012      
    597     7.17733  8515.30434  8218.34470     0.00012      
    598     7.18601  8506.91364  8219.50490     0.00012      
    599     7.19469  8501.13263  8218.39750     0.00012      
    600     7.20338  8497.52080  8224.51860     0.00012      
    601     7.21206  8495.70725  8233.50780     0.00012      
    602     7.22075  8495.42999  8229.37790     0.00012      
    603     7.22943  8496.46458  8239.74610     0.00012      
    604     7.23811  8498.63665  8243.98050     0.00012      
    605     7.24680  8501.80246  8247.92870     0.00012      
    606     7.25548  8505.84377  8256.84670     0.00012      
    607     7.26416  8510.66295  8261.74220     0.00012      
    608     7.27285  8516.17963  8267.36330     0.00012      
    609     7.28153  8522.32608  8280.63480     0.00012      
    610     7.29022  8529.04564  8285.05660     0.00012      
    611     7.29890  8536.29772  8297.25390     0.00012      
    612     7.30759  8544.03073  8306.24510     0.00012      
    613     7.31627  8552.21660  8311.69140     0.00012      
    614     7.32495  8560.82907  8324.56930     0.00012      
    615     7.33364  8569.84531  8339.13570     0.00012      
    616     7.34232  8579.34578  8341.71580     0.00012      
    617     7.35101  8589.12298  8355.70410     0.00012      
    618     7.35969  8599.25734  8365.91700     0.00012      
    619     7.36837  8609.74575  8376.17190     0.00012      
    620     7.37706  8620.58641  8398.62300     0.00012      
    621     7.38574  8631.77963  8418.77340     0.00012      
    622     7.39442  8643.33032  8445.02830     0.00012      
    623     7.40311  8655.24990  8479.70120     0.00012      
    624     7.41179  8667.55362  8503.34470     0.00012      
    625     7.42048  8680.26430  8527.78710     0.00012      
    626     7.42916  8693.41605  8549.24320     0.00012      
    627     7.43785  8707.05451  8556.90720     0.00012      
    628     7.44653  8721.24981  8574.06350     0.00012      
    629     7.45521  8736.12816  8583.34080     0.00012      
    630     7.46390  8751.95538  8582.94820     0.00012      
    631     7.47258  8769.37270  8615.02150     0.00012      
    632     7.48127  8789.92003  8666.24710     0.00012      
    633     7.48995  8816.95427  8777.13480     0.00011      
    634     7.49863  8856.79306  8948.56150     0.00011      
    635     7.50732  8919.20612  9213.05370     0.00011      
    636     7.51600  9015.62246  9590.79790     0.00010      
    637     7.52468  9153.77117 10106.30300     0.00010      
    638     7.53337  9329.65523 10758.41100     0.00009      
    639     7.54205  9520.62062 11533.36300     0.00009      
    640     7.55074  9684.29727 12139.81800     0.00008      
    641     7.55942  9769.13851 12419.10500     0.00008      
    642     7.56811  9745.30412 12263.47900     0.00008      
    643     7.57679  9632.48011 11711.61400     0.00009      
    644     7.58547  9480.85079 10955.28400     0.00009      
    645     7.59416  9336.64719 10279.98900     0.00010      
    646     7.60284  9227.43972  9781.48630     0.00010      
    647     7.61153  9161.26038  9398.36040     0.00011      
    648     7.62021  9132.69622  9160.62400     0.00011      
    649     7.62889  9130.68177  9004.93650     0.00011      
    650     7.63758  9145.28595  8915.60550     0.00011      
    651     7.64626  9169.93232  8885.88770     0.00011      
    652     7.65494  9201.51711  8879.76660     0.00011      
    653     7.66363  9239.71825  8901.65230     0.00011      
    654     7.67231  9287.20504  8938.39450     0.00011      
    655     7.68100  9351.95208  9003.98240     0.00011      
    656     7.68968  9452.91878  9139.05080     0.00011      
    657     7.69837  9629.06969  9376.79100     0.00011      
    658     7.70705  9947.83674  9799.71780     0.00010      
    659     7.71573 10502.47240 10437.79300     0.00010      
    660     7.72442 11383.86673 11373.31600     0.00009      
    661     7.73310 12622.46324 12817.55700     0.00008      
    662     7.74179 14119.79832 14586.95800     0.00007      
    663     7.75047 15607.09040 16486.16400     0.00006      
    664     7.75915 16669.50145 17987.41600     0.00006      
    665     7.76784 16906.46521 18264.09800     0.00005      
    666     7.77652 16239.41205 17250.89500     0.00006      
    667     7.78520 14990.93298 15528.63600     0.00006      
    668     7.79389 13599.38404 13775.30000     0.00007      
    669     7.80257 12392.56533 12297.10400     0.00008      
    670     7.81126 11530.68508 11272.93500     0.00009      
    671     7.81994 11035.48294 10663.28300     0.00009      
    672     7.82863 10862.28721 10341.65100     0.00010      
    673     7.83731 10984.64655 10391.09500     0.00010      
    674     7.84599 11475.80340 10959.76400     0.00009      
    675     7.85468 12580.53384 12231.37400     0.00008      
    676     7.86336 14755.07223 14442.70800     0.00007      
    677     7.87205 18610.80096 17938.45100     0.00006      
    678     7.88073 24679.19676 23357.01200     0.00004      
    679     7.88941 32998.93987 30378.99200     0.00003      
    680     7.89810 42688.59718 39851.61300     0.00003      
    681     7.90678 51747.37655 48782.89800     0.00002      
    682     7.91546 57349.19661 53846.93000     0.00002      
    683     7.92415 57153.71181 53090.71900     0.00002      
    684     7.93283 51266.90184 47163.46900     0.00002      
    685     7.94152 42136.95454 38585.60900     0.00003      
    686     7.95020 32557.44647 29434.41200     0.00003      
    687     7.95889 24451.06721 22768.97500     0.00004      
    688     7.96757 18623.79588 17977.05700     0.00006      
    689     7.97625 14984.62319 14711.96600     0.00007      
    690     7.98494 12983.47958 12728.62400     0.00008      
    691     7.99362 12012.84691 11577.80100     0.00009      
    692     8.00230 11630.44558 11009.72300     0.00009      
    693     8.01099 11618.08687 11011.23400     0.00009      
    694     8.01967 11968.40398 11562.59600     0.00009      
    695     8.02836 12867.47656 12724.13000     0.00008      
    696     8.03704 14670.05132 14778.23600     0.00007      
    697     8.04572 17809.69257 18043.39500     0.00006      
    698     8.05441 22582.92006 22821.97500     0.00004      
    699     8.06309 28838.70652 29172.35700     0.00003      
    700     8.07178 35709.65012 37059.83600     0.00003      
    701     8.08046 41556.86193 43268.64500     0.00002      
    702     8.08914 44346.41270 45866.81600     0.00002      
    703     8.09783 42834.89673 43885.06600     0.00002      
    704     8.10651 37716.97055 38199.41000     0.00003      
    705     8.11520 30946.64716 30715.51800     0.00003      
    706     8.12388 24359.87237 23974.90600     0.00004      
    707     8.13257 19074.02650 19244.10200     0.00005      
    708     8.14125 15441.79208 15835.24500     0.00006      
    709     8.14993 13265.25151 13719.68600     0.00007      
    710     8.15862 12111.48166 12522.30600     0.00008      
    711     8.16730 11558.72347 11814.12500     0.00008      
    712     8.17599 11312.03259 11485.31100     0.00009      
    713     8.18467 11220.47207 11325.41500     0.00009      
    714     8.19335 11250.38860 11283.61900     0.00009      
    715     8.20204 11441.29245 11411.09800     0.00009      
    716     8.21072 11858.92930 11783.46200     0.00008      
    717     8.21941 12548.74428 12503.01500     0.00008      
    718     8.22809 13490.47215 13562.43300     0.00007      
    719     8.23677 14569.80789 15010.39900     0.00007      
    720     8.24546 15584.42472 16394.39100     0.00006      
    721     8.25414 16311.49711 17314.10900     0.00006      
    722     8.26282 16671.21898 17709.36700     0.00006      
    723     8.27151 16822.31771 17877.63700     0.00006      
    724     8.28019 16978.24748 18211.29300     0.00005      
    725     8.28888 17185.65565 18850.66600     0.00005      
    726     8.29756 17267.75549 19294.49600     0.00005      
    727     8.30624 16943.18810 18949.65800     0.00005      
    728     8.31493 16100.80534 17724.57000     0.00006      
    729     8.32361 14921.23873 16011.81500     0.00006      
    730     8.33230 13694.39410 14220.89600     0.00007      
    731     8.34098 12650.89183 12809.82600     0.00008      
    732     8.34966 11915.51883 11924.52800     0.00008      
    733     8.35835 11524.91006 11416.31800     0.00009      
    734     8.36703 11480.72156 11305.89100     0.00009      
    735     8.37572 11801.44578 11588.28500     0.00009      
    736     8.38440 12536.83781 12302.49700     0.00008      
    737     8.39309 13727.99991 13480.50800     0.00007      
    738     8.40177 15328.46419 15202.30100     0.00007      
    739     8.41045 17129.85380 17363.47300     0.00006      
    740     8.41914 18733.58186 19213.29900     0.00005      
    741     8.42782 19628.64956 20216.77500     0.00005      
    742     8.43651 19472.21204 20015.96900     0.00005      
    743     8.44519 18376.30371 18665.33000     0.00005      
    744     8.45387 16762.49306 16637.90400     0.00006      
    745     8.46256 15060.84328 14694.59500     0.00007      
    746     8.47124 13582.93224 13218.82900     0.00008      
    747     8.47993 12476.98410 12094.20900     0.00008      
    748     8.48861 11745.55450 11379.66600     0.00009      
    749     8.49729 11310.39279 10934.60600     0.00009      
    750     8.50598 11074.59204 10671.84600     0.00009      
    751     8.51466 10957.68391 10558.26500     0.00009      
    752     8.52335 10905.81112 10505.95800     0.00010      
    753     8.53203 10888.07517 10498.63700     0.00010      
    754     8.54071 10888.79244 10503.44700     0.00010      
    755     8.54940 10900.81202 10514.38000     0.00010      
    756     8.55808 10921.31132 10534.49800     0.00009      
    757     8.56676 10949.47997 10556.50200     0.00009      
    758     8.57545 10985.58513 10580.07900     0.00009      
    759     8.58413 11030.74004 10620.50000     0.00009      
    760     8.59282 11087.46148 10656.05800     0.00009      
    761     8.60150 11161.50250 10713.05200     0.00009      
    762     8.61018 11266.78538 10798.20700     0.00009      
    763     8.61887 11436.13928 10975.13300     0.00009      
    764     8.62755 11740.14469 11345.73200     0.00009      
    765     8.63624 12310.14980 12016.71000     0.00008      
    766     8.64492 13348.53007 13142.78100     0.00008      
    767     8.65360 15094.69025 14891.85700     0.00007      
    768     8.66229 17722.38246 17337.54500     0.00006      
    769     8.67097 21180.67510 20994.26200     0.00005      
    770     8.67966 25055.23663 25312.29700     0.00004      
    771     8.68834 28534.60552 29311.03500     0.00003      
    772     8.69703 30592.03773 32004.07200     0.00003      
    773     8.70571 30589.95536 32123.65600     0.00003      
    774     8.71439 28938.47209 30029.61300     0.00003      
    775     8.72308 26767.16836 27232.79100     0.00004      
    776     8.73176 25070.72375 25528.68600     0.00004      
    777     8.74045 24257.85628 25435.33400     0.00004      
    778     8.74913 24079.52827 26214.80900     0.00004      
    779     8.75781 23822.59207 26460.21300     0.00004      
    780     8.76650 22809.20730 25190.16200     0.00004      
    781     8.77518 20940.15637 22641.22300     0.00004      
    782     8.78387 18634.99575 19577.26200     0.00005      
    783     8.79255 16395.52008 16697.07200     0.00006      
    784     8.80123 14561.63733 14579.37100     0.00007      
    785     8.80992 13259.36316 13218.05100     0.00008      
    786     8.81860 12442.78517 12259.98000     0.00008      
    787     8.82728 11982.07057 11724.33300     0.00009      
    788     8.83597 11741.81870 11418.91400     0.00009      
    789     8.84465 11622.10255 11266.40600     0.00009      
    790     8.85334 11564.74159 11223.85900     0.00009      
    791     8.86202 11543.55948 11220.52700     0.00009      
    792     8.87070 11553.62834 11276.34800     0.00009      
    793     8.87939 11605.06445 11367.74000     0.00009      
    794     8.88807 11719.30332 11533.54900     0.00009      
    795     8.89676 11922.62913 11771.32000     0.00008      
    796     8.90544 12232.64652 12118.63100     0.00008      
    797     8.91412 12639.14059 12589.43900     0.00008      
    798     8.92281 13087.75910 13122.00200     0.00008      
    799     8.93149 13475.69032 13567.15600     0.00007      
    800     8.94018 13673.42275 13813.45800     0.00007      
    801     8.94886 13598.17588 13720.55500     0.00007      
    802     8.95755 13289.93497 13324.28100     0.00008      
    803     8.96623 12871.85047 12834.15600     0.00008      
    804     8.97491 12461.40435 12394.55300     0.00008      
    805     8.98360 12131.73131 12046.95600     0.00008      
    806     8.99228 11908.32474 11815.73500     0.00008      
    807     9.00097 11782.03113 11677.21300     0.00009      
    808     9.00965 11728.51219 11596.46600     0.00009      
    809     9.01833 11724.09976 11581.41200     0.00009      
    810     9.02702 11753.09749 11601.55700     0.00009      
    811     9.03570 11807.24422 11669.38300     0.00009      
    812     9.04439 11881.42378 11772.20200     0.00008      
    813     9.05307 11969.22681 11906.91900     0.00008      
    814     9.06175 12060.57029 12065.53600     0.00008      
    815     9.07044 12142.66900 12202.69100     0.00008      
    816     9.07912 12207.43067 12277.16300     0.00008      
    817     9.08780 12262.89047 12320.98800     0.00008      
    818     9.09649 12335.96349 12355.32600     0.00008      
    819     9.10517 12468.90762 12489.22200     0.00008      
    820     9.11386 12721.20627 12797.93400     0.00008      
    821     9.12254 13172.29756 13336.42500     0.00007      
    822     9.13122 13916.60839 14221.50400     0.00007      
    823     9.13991 15048.97912 15540.04600     0.00006      
    824     9.14859 16653.28759 17549.74200     0.00006      
    825     9.15728 18810.45214 20407.09200     0.00005      
    826     9.16596 21619.70090 23691.82600     0.00004      
    827     9.17464 25217.50691 27683.95300     0.00004      
    828     9.18333 29800.73837 32094.11300     0.00003      
    829     9.19201 35479.71373 37342.21100     0.00003      
    830     9.20070 41838.52880 43751.98400     0.00002      
    831     9.20938 47599.91871 49807.23800     0.00002      
    832     9.21807 50783.36178 53035.41800     0.00002      
    833     9.22675 49742.53185 52070.84800     0.00002      
    834     9.23543 44655.73842 46962.02300     0.00002      
    835     9.24412 37361.90707 39205.60900     0.00003      
    836     9.25280 29878.00674 31391.19300     0.00003      
    837     9.26149 23563.76490 25114.72300     0.00004      
    838     9.27017 18981.50304 20518.14800     0.00005      
    839     9.27885 16057.76423 17129.88700     0.00006      
    840     9.28754 14384.32439 15066.70900     0.00007      
    841     9.29622 13501.69245 13671.80500     0.00007      
    842     9.30490 13054.53323 12918.41000     0.00008      
    843     9.31359 12825.43114 12556.63100     0.00008      
    844     9.32227 12703.71055 12375.71000     0.00008      
    845     9.33096 12643.09532 12309.46900     0.00008      
    846     9.33964 12633.65003 12322.37500     0.00008      
    847     9.34832 12692.09526 12452.97800     0.00008      
    848     9.35701 12865.05065 12729.20700     0.00008      
    849     9.36569 13235.50022 13259.02700     0.00008      
    850     9.37438 13918.00147 14070.14700     0.00007      
    851     9.38306 15027.71050 15261.73700     0.00007      
    852     9.39174 16620.84657 16991.13300     0.00006      
    853     9.40043 18624.48433 19273.85000     0.00005      
    854     9.40911 20789.00317 21734.58600     0.00005      
    855     9.41780 22690.66806 23999.13100     0.00004      
    856     9.42648 23870.67273 25215.45300     0.00004      
    857     9.43516 24154.89343 25189.43900     0.00004      
    858     9.44385 23730.98806 24375.43600     0.00004      
    859     9.45253 22815.96448 23176.35700     0.00004      
    860     9.46122 21470.60627 21655.45900     0.00005      
    861     9.46990 19760.32622 19843.27900     0.00005      
    862     9.47859 17912.97522 17923.62300     0.00006      
    863     9.48727 16199.41629 16066.80600     0.00006      
    864     9.49595 14795.81894 14607.28700     0.00007      
    865     9.50464 13765.94287 13655.72500     0.00007      
    866     9.51332 13084.08663 12990.46900     0.00008      
    867     9.52201 12672.37000 12589.94300     0.00008      
    868     9.53069 12440.83794 12350.01300     0.00008      
    869     9.53937 12315.30333 12216.22100     0.00008      
    870     9.54806 12246.93288 12159.21100     0.00008      
    871     9.55674 12208.77310 12139.31200     0.00008      
    872     9.56542 12187.50333 12149.66300     0.00008      
    873     9.57411 12176.27738 12176.87600     0.00008      
    874     9.58279 12170.34557 12202.61600     0.00008      
    875     9.59148 12165.19231 12236.51400     0.00008      
    876     9.60016 12156.82157 12238.29800     0.00008      
    877     9.60884 12143.82812 12220.17200     0.00008      
    878     9.61753 12128.17750 12187.17200     0.00008      
    879     9.62621 12113.07741 12141.84800     0.00008      
    880     9.63490 12101.09057 12106.59000     0.00008      
    881     9.64358 12093.63765 12083.81900     0.00008      
    882     9.65226 12091.23174 12060.19800     0.00008      
    883     9.66095 12094.09789 12057.50800     0.00008      
    884     9.66963 12103.39752 12060.77400     0.00008      
    885     9.67832 12122.64033 12070.97600     0.00008      
    886     9.68700 12159.47910 12108.29300     0.00008      
    887     9.69568 12227.02097 12152.22900     0.00008      
    888     9.70437 12342.98505 12235.46200     0.00008      
    889     9.71305 12524.57112 12360.16000     0.00008      
    890     9.72174 12779.11046 12524.39700     0.00008      
    891     9.73042 13094.18429 12751.83600     0.00008      
    892     9.73911 13433.33787 13009.21800     0.00008      
    893     9.74779 13742.09876 13241.65300     0.00008      
    894     9.75647 13975.50926 13441.01500     0.00007      
    895     9.76516 14148.37722 13560.94100     0.00007      
    896     9.77384 14337.70527 13676.50300     0.00007      
    897     9.78253 14606.54476 13860.64100     0.00007      
    898     9.79121 14939.56595 14115.44400     0.00007      
    899     9.79989 15228.19727 14362.70900     0.00007      
    900     9.80858 15308.53677 14464.35900     0.00007      
    901     9.81726 15075.76971 14299.63200     0.00007      
    902     9.82594 14583.51812 13918.82800     0.00007      
    903     9.83463 13982.90565 13463.67300     0.00007      
    904     9.84331 13413.39727 13043.19200     0.00008      
    905     9.85200 12958.92217 12708.07000     0.00008      
    906     9.86068 12645.27404 12477.16400     0.00008      
    907     9.86936 12456.47591 12313.06900     0.00008      
    908     9.87805 12357.95250 12221.40500     0.00008      
    909     9.88673 12315.68346 12171.33300     0.00008      
    910     9.89542 12305.22934 12150.93900     0.00008      
    911     9.90410 12312.48514 12156.54800     0.00008      
    912     9.91278 12330.73995 12175.07600     0.00008      
    913     9.92147 12357.48177 12206.65200     0.00008      
    914     9.93015 12392.29353 12240.09100     0.00008      
    915     9.93884 12435.80917 12259.11100     0.00008      
    916     9.94752 12489.33862 12299.03700     0.00008      
    917     9.95620 12554.84513 12343.44800     0.00008      
    918     9.96489 12635.22958 12401.92100     0.00008      
    919     9.97357 12735.01341 12493.21200     0.00008      
    920     9.98226 12862.24257 12607.48200     0.00008      
    921     9.99094 13032.99729 12788.81200     0.00008      
    922     9.99963 13281.17310 13060.70900     0.00008      
    923    10.00831 13676.28531 13509.74100     0.00007      
    924    10.01699 14349.84432 14308.10900     0.00007      
    925    10.02568 15519.89671 15619.90500     0.00006      
    926    10.03436 17492.66000 17663.43800     0.00006      
    927    10.04304 20606.46194 20713.93600     0.00005      
    928    10.05173 25097.65353 24710.30500     0.00004      
    929    10.06041 30907.61267 30192.94300     0.00003      
    930    10.06910 37497.42725 36764.48400     0.00003      
    931    10.07778 43715.16144 43127.84800     0.00002      
    932    10.08647 47861.82152 47684.80900     0.00002      
    933    10.09515 48361.43059 48522.89100     0.00002      
    934    10.10383 45034.60113 45072.81600     0.00002      
    935    10.11252 39298.65440 38903.81600     0.00003      
    936    10.12120 32962.38986 32431.50800     0.00003      
    937    10.12989 27387.48113 27062.03700     0.00004      
    938    10.13857 23336.53691 23241.62900     0.00004      
    939    10.14725 21048.87780 21187.80700     0.00005      
    940    10.15594 20360.09025 20597.10000     0.00005      
    941    10.16462 20840.79920 21207.74200     0.00005      
    942    10.17330 21920.34336 22542.63900     0.00004      
    943    10.18199 22989.69892 23863.97100     0.00004      
    944    10.19067 23582.69944 24557.14500     0.00004      
    945    10.19936 23634.26149 24468.32800     0.00004      
    946    10.20804 23415.91578 24121.74600     0.00004      
    947    10.21672 23153.73991 23892.70100     0.00004      
    948    10.22541 22806.14365 23675.10400     0.00004      
    949    10.23409 22119.14986 23066.25800     0.00004      
    950    10.24278 20925.43374 21690.43600     0.00005      
    951    10.25146 19377.45187 19698.22900     0.00005      
    952    10.26015 17799.28639 17672.70100     0.00006      
    953    10.26883 16478.78593 16146.05200     0.00006      
    954    10.27751 15614.76776 15227.20900     0.00007      
    955    10.28620 15355.56270 15059.37700     0.00007      
    956    10.29488 15883.21677 15803.50500     0.00006      
    957    10.30357 17503.70563 17650.83600     0.00006      
    958    10.31225 20660.53677 20796.43600     0.00005      
    959    10.32093 25793.66598 25576.08800     0.00004      
    960    10.32962 33037.77126 32534.64300     0.00003      
    961    10.33830 41849.97309 41189.17600     0.00002      
    962    10.34699 50768.61102 50705.54300     0.00002      
    963    10.35567 57449.37796 58187.82800     0.00002      
    964    10.36435 59407.56643 59987.44900     0.00002      
    965    10.37304 55777.42055 55803.86300     0.00002      
    966    10.38172 48160.79916 47484.94900     0.00002      
    967    10.39040 39160.24378 38149.48800     0.00003      
    968    10.39909 30874.96478 29931.75600     0.00003      
    969    10.40777 24464.99856 23958.47300     0.00004      
    970    10.41646 20224.92305 20005.15400     0.00005      
    971    10.42514 17882.72311 17490.91600     0.00006      
    972    10.43383 16963.79014 16427.10700     0.00006      
    973    10.44251 17081.29458 16577.29700     0.00006      
    974    10.45119 18105.71265 17910.64500     0.00006      
    975    10.45988 20257.55492 20657.46300     0.00005      
    976    10.46856 24148.61774 25162.14500     0.00004      
    977    10.47724 30717.07985 31636.19700     0.00003      
    978    10.48593 40889.40373 40981.57000     0.00002      
    979    10.49461 54895.07365 54514.39100     0.00002      
    980    10.50330 71557.84083 71224.84400     0.00001      
    981    10.51198 87886.42624 88897.48400     0.00001      
    982    10.52066 99286.11849 102068.45000     0.00001     
    983    10.52935 101236.04426 104242.19000     0.00001    
    984    10.53803 92730.51163 94481.21100     0.00001      
    985    10.54672 77298.66135 77372.42200     0.00001      
    986    10.55540 59847.21010 59258.85900     0.00002      
    987    10.56409 44096.45806 43603.11300     0.00002      
    988    10.57277 31953.05458 32136.44100     0.00003      
    989    10.58145 23728.31383 24345.35200     0.00004      
    990    10.59014 18729.34098 19034.59600     0.00005      
    991    10.59882 15930.45847 15850.63500     0.00006      
    992    10.60751 14423.41647 14086.88500     0.00007      
    993    10.61619 13592.79180 13031.23700     0.00008      
    994    10.62487 13092.34826 12523.15800     0.00008      
    995    10.63356 12753.09849 12215.92300     0.00008      
    996    10.64224 12499.96129 12021.87000     0.00008      
    997    10.65093 12300.82813 11886.23900     0.00008      
    998    10.65961 12141.41043 11795.27100     0.00008      
    999    10.66829 12015.94281 11739.76700     0.00009      
   1000    10.67698 11925.47321 11716.42600     0.00009      
   1001    10.68566 11880.57586 11757.65900     0.00009      
   1002    10.69435 11906.70009 11867.56400     0.00008      
   1003    10.70303 12048.94656 12085.02100     0.00008      
   1004    10.71171 12369.70128 12446.80900     0.00008      
   1005    10.72040 12930.86336 12951.52100     0.00008      
   1006    10.72908 13757.99054 13681.05400     0.00007      
   1007    10.73776 14796.47216 14608.54400     0.00007      
   1008    10.74645 15880.71341 15588.25700     0.00006      
   1009    10.75513 16733.30358 16403.46100     0.00006      
   1010    10.76382 17044.89885 16743.86900     0.00006      
   1011    10.77250 16686.93839 16470.21300     0.00006      
   1012    10.78119 15852.88785 15792.59400     0.00006      
   1013    10.78987 14894.44390 14972.39800     0.00007      
   1014    10.79855 14112.01634 14279.91200     0.00007      
   1015    10.80724 13672.73233 13895.42100     0.00007      
   1016    10.81592 13595.09772 13808.45600     0.00007      
   1017    10.82461 13767.56858 13928.18800     0.00007      
   1018    10.83329 13993.37829 14070.40100     0.00007      
   1019    10.84197 14070.66109 14084.32900     0.00007      
   1020    10.85066 13889.83362 13868.62800     0.00007      
   1021    10.85934 13462.46946 13437.22600     0.00007      
   1022    10.86802 12888.80053 12854.16900     0.00008      
   1023    10.87671 12302.42038 12292.20200     0.00008      
   1024    10.88539 11810.16887 11823.24400     0.00008      
   1025    10.89408 11470.11020 11485.65000     0.00009      
   1026    10.90276 11298.52869 11289.53200     0.00009      
   1027    10.91145 11283.03404 11221.12000     0.00009      
   1028    10.92013 11392.44044 11263.31400     0.00009      
   1029    10.92881 11579.92603 11379.64800     0.00009      
   1030    10.93750 11786.33996 11530.72900     0.00009      
   1031    10.94618 11949.61822 11688.48400     0.00009      
   1032    10.95487 12039.79818 11827.40300     0.00008      
   1033    10.96355 12111.14502 12009.39100     0.00008      
   1034    10.97223 12301.44000 12334.85200     0.00008      
   1035    10.98092 12771.89570 12873.84700     0.00008      
   1036    10.98960 13641.36448 13750.29700     0.00007      
   1037    10.99828 14921.62881 14977.86800     0.00007      
   1038    11.00697 16463.53978 16495.28700     0.00006      
   1039    11.01565 17935.02033 17976.06300     0.00006      
   1040    11.02434 18864.71441 18897.29900     0.00005      
   1041    11.03302 18848.76220 18886.46900     0.00005      
   1042    11.04171 17877.47256 17981.83200     0.00006      
   1043    11.05039 16338.89603 16505.87100     0.00006      
   1044    11.05907 14693.77068 14847.31300     0.00007      
   1045    11.06776 13275.46753 13476.77000     0.00007      
   1046    11.07644 12259.07606 12516.46400     0.00008      
   1047    11.08513 11699.41118 11969.36900     0.00008      
   1048    11.09381 11600.06130 11830.89900     0.00008      
   1049    11.10249 11973.46405 12121.81100     0.00008      
   1050    11.11118 12854.51432 12849.07000     0.00008      
   1051    11.11986 14256.69211 13977.33800     0.00007      
   1052    11.12855 16090.93811 15507.44900     0.00006      
   1053    11.13723 18093.55013 17237.02300     0.00006      
   1054    11.14591 19799.67631 18731.41200     0.00005      
   1055    11.15460 20627.70088 19493.55500     0.00005      
   1056    11.16328 20204.24843 19220.02000     0.00005      
   1057    11.17197 18705.13937 17940.40800     0.00006      
   1058    11.18065 16681.71267 16136.01400     0.00006      
   1059    11.18933 14661.57690 14339.49800     0.00007      
   1060    11.19802 12979.76961 12865.27200     0.00008      
   1061    11.20670 11769.05845 11777.19200     0.00008      
   1062    11.21538 11010.39195 11056.40000     0.00009      
   1063    11.22407 10609.05808 10640.86300     0.00009      
   1064    11.23275 10458.13346 10444.60700     0.00010      
   1065    11.24144 10468.96665 10450.56500     0.00010      
   1066    11.25012 10572.16315 10579.21400     0.00009      
   1067    11.25880 10705.53627 10767.22100     0.00009      
   1068    11.26749 10805.39533 10904.74100     0.00009      
   1069    11.27617 10816.76247 10938.89500     0.00009      
   1070    11.28486 10729.25550 10853.94900     0.00009      
   1071    11.29354 10591.91149 10699.76800     0.00009      
   1072    11.30223 10477.79180 10585.14300     0.00009      
   1073    11.31091 10447.52402 10550.48500     0.00009      
   1074    11.31959 10531.66736 10634.33800     0.00009      
   1075    11.32828 10722.54612 10842.22600     0.00009      
   1076    11.33696 10974.41237 11105.50500     0.00009      
   1077    11.34564 11213.68441 11357.25700     0.00009      
   1078    11.35433 11367.53933 11519.78300     0.00009      
   1079    11.36301 11419.97388 11582.01600     0.00009      
   1080    11.37170 11433.32451 11634.64100     0.00009      
   1081    11.38038 11485.35493 11743.08000     0.00009      
   1082    11.38907 11602.83454 11920.06500     0.00008      
   1083    11.39775 11739.26367 12103.06300     0.00008      
   1084    11.40643 11788.80003 12137.83200     0.00008      
   1085    11.41512 11652.48173 11944.19000     0.00008      
   1086    11.42380 11328.31778 11554.55300     0.00009      
   1087    11.43249 10908.24851 11073.63700     0.00009      
   1088    11.44117 10503.88607 10644.94800     0.00009      
   1089    11.44985 10206.31980 10352.66500     0.00010      
   1090    11.45854 10082.11269 10246.41300     0.00010      
   1091    11.46722 10180.54316 10359.49100     0.00010      
   1092    11.47590 10534.24262 10699.98700     0.00009      
   1093    11.48459 11148.42478 11325.34100     0.00009      
   1094    11.49327 11974.58959 12247.25900     0.00008      
   1095    11.50196 12885.35585 13279.39000     0.00008      
   1096    11.51064 13665.14021 14122.21700     0.00007      
   1097    11.51932 14049.98988 14478.21000     0.00007      
   1098    11.52801 13877.45810 14192.19600     0.00007      
   1099    11.53669 13243.20153 13472.33100     0.00007      
   1100    11.54538 12422.22469 12573.33100     0.00008      
   1101    11.55406 11685.22081 11798.01400     0.00008      
   1102    11.56275 11212.99489 11313.39300     0.00009      
   1103    11.57143 11074.79139 11165.76500     0.00009      
   1104    11.58011 11230.47026 11323.30500     0.00009      
   1105    11.58880 11550.00047 11652.02900     0.00009      
   1106    11.59748 11843.26913 11929.09600     0.00008      
   1107    11.60617 11914.73831 11958.05800     0.00008      
   1108    11.61485 11669.92257 11664.50500     0.00009      
   1109    11.62353 11178.45103 11143.13800     0.00009      
   1110    11.63222 10589.52430 10564.09900     0.00009      
   1111    11.64090 10031.52997 10040.66200     0.00010      
   1112    11.64959  9579.14185  9620.78130     0.00010      
   1113    11.65827  9254.73152  9316.41410     0.00011      
   1114    11.66695  9044.06387  9100.99900     0.00011      
   1115    11.67564  8916.62106  8957.93070     0.00011      
   1116    11.68432  8841.98710  8869.73240     0.00011      
   1117    11.69300  8798.04975  8816.13960     0.00011      
   1118    11.70169  8772.27190  8789.78610     0.00011      
   1119    11.71037  8760.19306  8777.60550     0.00011      
   1120    11.71906  8764.55205  8779.95510     0.00011      
   1121    11.72774  8796.57222  8823.13380     0.00011      
   1122    11.73642  8879.09362  8911.08980     0.00011      
   1123    11.74511  9048.74425  9075.78520     0.00011      
   1124    11.75379  9351.91480  9353.60840     0.00011      
   1125    11.76248  9829.62164  9767.44340     0.00010      
   1126    11.77116 10490.79605 10363.15000     0.00010      
   1127    11.77984 11282.62310 11119.14300     0.00009      
   1128    11.78853 12071.42994 11841.79500     0.00008      
   1129    11.79721 12646.10625 12317.84300     0.00008      
   1130    11.80590 12786.25858 12367.62700     0.00008      
   1131    11.81458 12421.12553 11980.30900     0.00008      
   1132    11.82326 11698.86454 11342.63900     0.00009      
   1133    11.83195 10851.13897 10611.60700     0.00009      
   1134    11.84063 10061.90834  9957.15530     0.00010      
   1135    11.84932  9432.33912  9438.88770     0.00011      
   1136    11.85800  8988.18527  9055.03130     0.00011      
   1137    11.86669  8704.24421  8783.30660     0.00011      
   1138    11.87537  8534.58764  8599.40820     0.00012      
   1139    11.88405  8435.22584  8487.34470     0.00012      
   1140    11.89274  8374.40840  8421.67970     0.00012      
   1141    11.90142  8333.29470  8376.08690     0.00012      
   1142    11.91011  8302.24642  8341.96290     0.00012      
   1143    11.91879  8276.85111  8320.73140     0.00012      
   1144    11.92747  8255.24354  8297.96780     0.00012      
   1145    11.93616  8236.66391  8281.53420     0.00012      
   1146    11.94484  8220.81849  8270.81930     0.00012      
   1147    11.95353  8207.64535  8255.24800     0.00012      
   1148    11.96221  8197.27847  8250.64940     0.00012      
   1149    11.97089  8190.17076  8245.70610     0.00012      
   1150    11.97958  8187.64191  8243.10060     0.00012      
   1151    11.98826  8193.03656  8253.29390     0.00012      
   1152    11.99694  8213.89708  8268.96000     0.00012      
   1153    12.00563  8264.72675  8307.52640     0.00012      
   1154    12.01431  8369.69496  8379.98830     0.00012      
   1155    12.02300  8561.71711  8489.86620     0.00012      
   1156    12.03168  8875.63468  8671.61520     0.00012      
   1157    12.04036  9333.36637  8937.39750     0.00011      
   1158    12.04905  9924.28696  9283.56250     0.00011      
   1159    12.05773 10588.40337  9682.90330     0.00010      
   1160    12.06642 11207.82513 10060.81500     0.00010      
   1161    12.07510 11628.18823 10359.37300     0.00010      
   1162    12.08378 11744.72704 10561.25500     0.00009      
   1163    12.09247 11578.84521 10630.52100     0.00009      
   1164    12.10115 11216.13895 10548.32200     0.00009      
   1165    12.10984 10721.04285 10301.18600     0.00010      
   1166    12.11852 10148.75010  9910.73830     0.00010      
   1167    12.12721  9573.61891  9469.89260     0.00011      
   1168    12.13589  9063.07040  9045.50100     0.00011      
   1169    12.14457  8652.55237  8692.96970     0.00012      
   1170    12.15326  8348.81172  8437.28030     0.00012      
   1171    12.16194  8139.67931  8256.94340     0.00012      
   1172    12.17062  8003.67207  8134.70170     0.00012      
   1173    12.17931  7917.83494  8048.86330     0.00012      
   1174    12.18799  7862.95175  7984.81450     0.00013      
   1175    12.19668  7825.71015  7938.52880     0.00013      
   1176    12.20536  7798.73099  7896.98680     0.00013      
   1177    12.21405  7777.47891  7859.79300     0.00013      
   1178    12.22273  7759.97991  7836.29200     0.00013      
   1179    12.23141  7745.44333  7813.29540     0.00013      
   1180    12.24010  7733.78695  7794.36180     0.00013      
   1181    12.24878  7725.65262  7782.56490     0.00013      
   1182    12.25746  7722.89764  7774.98000     0.00013      
   1183    12.26615  7729.64354  7780.96340     0.00013      
   1184    12.27483  7753.69629  7809.53270     0.00013      
   1185    12.28352  7807.75460  7866.34180     0.00013      
   1186    12.29220  7908.69449  7983.53030     0.00013      
   1187    12.30088  8073.37343  8171.57420     0.00012      
   1188    12.30957  8310.18928  8462.98440     0.00012      
   1189    12.31825  8608.76538  8866.96390     0.00011      
   1190    12.32694  8931.12777  9307.95700     0.00011      
   1191    12.33562  9209.07077  9645.58200     0.00010      
   1192    12.34430  9359.72396  9775.54390     0.00010      
   1193    12.35299  9335.47979  9655.46970     0.00010      
   1194    12.36167  9159.01252  9369.71000     0.00011      
   1195    12.37036  8890.91254  8999.67290     0.00011      
   1196    12.37904  8592.59623  8627.08890     0.00012      
   1197    12.38773  8316.38713  8329.84280     0.00012      
   1198    12.39641  8097.95049  8111.83010     0.00012      
   1199    12.40509  7953.87309  7986.75980     0.00013      
   1200    12.41378  7886.14395  7952.21970     0.00013      
   1201    12.42246  7891.87102  8007.27200     0.00012      
   1202    12.43115  7969.07618  8169.03370     0.00012      
   1203    12.43983  8120.98924  8445.88770     0.00012      
   1204    12.44851  8361.55172  8830.65820     0.00011      
   1205    12.45720  8722.83577  9312.41800     0.00011      
   1206    12.46588  9261.09461  9880.18070     0.00010      
   1207    12.47457 10058.59642 10603.49300     0.00009      
   1208    12.48325 11204.15628 11634.45900     0.00009      
   1209    12.49193 12727.44454 13046.04000     0.00008      
   1210    12.50062 14512.51511 14684.78900     0.00007      
   1211    12.50930 16247.97522 16193.53000     0.00006      
   1212    12.51798 17442.35048 16981.51000     0.00006      
   1213    12.52667 17608.56018 16776.50200     0.00006      
   1214    12.53535 16640.07511 15631.10400     0.00006      
   1215    12.54404 14916.55902 13971.01200     0.00007      
   1216    12.55272 12964.02794 12307.28100     0.00008      
   1217    12.56140 11181.23842 10835.49200     0.00009      
   1218    12.57009  9778.65561  9697.69140     0.00010      
   1219    12.57877  8801.17485  8858.98440     0.00011      
   1220    12.58746  8185.84416  8293.17770     0.00012      
   1221    12.59614  7827.03307  7926.91700     0.00013      
   1222    12.60482  7625.91613  7694.27690     0.00013      
   1223    12.61351  7511.52377  7558.83110     0.00013      
   1224    12.62219  7441.72642  7479.54100     0.00013      
   1225    12.63088  7394.77428  7424.14790     0.00013      
   1226    12.63956  7360.54906  7387.18360     0.00014      
   1227    12.64824  7334.55457  7363.21880     0.00014      
   1228    12.65693  7314.70531  7341.15230     0.00014      
   1229    12.66561  7300.12887  7327.95750     0.00014      
   1230    12.67430  7290.27398  7316.11430     0.00014      
   1231    12.68298  7284.93484  7305.95120     0.00014      
   1232    12.69167  7284.12835  7303.82810     0.00014      
   1233    12.70035  7288.07308  7303.53370     0.00014      
   1234    12.70903  7297.19935  7306.15970     0.00014      
   1235    12.71772  7312.18598  7317.78660     0.00014      
   1236    12.72640  7334.03486  7330.54390     0.00014      
   1237    12.73509  7364.09677  7351.09860     0.00014      
   1238    12.74377  7404.48396  7385.61870     0.00014      
   1239    12.75245  7458.67539  7433.41260     0.00013      
   1240    12.76114  7533.30147  7513.18550     0.00013      
   1241    12.76982  7642.64369  7632.81590     0.00013      
   1242    12.77850  7818.00743  7839.21140     0.00013      
   1243    12.78719  8124.59008  8215.52050     0.00012      
   1244    12.79587  8684.03798  8873.74320     0.00011      
   1245    12.80456  9692.24030  9995.61520     0.00010      
   1246    12.81324 11408.01842 11742.96600     0.00009      
   1247    12.82192 14084.93745 14338.73600     0.00007      
   1248    12.83061 17835.97253 18011.60700     0.00006      
   1249    12.83929 22469.68268 22728.90200     0.00004      
   1250    12.84798 27357.14047 27566.72500     0.00004      
   1251    12.85666 31401.04899 31096.83000     0.00003      
   1252    12.86534 33266.97030 32200.72700     0.00003      
   1253    12.87403 32180.86095 30652.57200     0.00003      
   1254    12.88271 28648.78607 27224.20300     0.00004      
   1255    12.89140 23960.66715 22822.28500     0.00004      
   1256    12.90008 19292.06836 18707.84600     0.00005      
   1257    12.90877 15354.69579 15214.49200     0.00007      
   1258    12.91745 12409.76824 12543.65100     0.00008      
   1259    12.92613 10402.77020 10575.07900     0.00009      
   1260    12.93482  9127.63613  9206.22070     0.00011      
   1261    12.94350  8349.78150  8363.34770     0.00012      
   1262    12.95219  7878.80642  7841.92380     0.00013      
   1263    12.96087  7588.87394  7542.82280     0.00013      
   1264    12.96955  7407.81095  7380.20310     0.00014      
   1265    12.97824  7297.30317  7289.75630     0.00014      
   1266    12.98692  7237.07693  7256.55620     0.00014      
   1267    12.99560  7214.42996  7273.80860     0.00014      
   1268    13.00429  7217.59936  7316.70070     0.00014      
   1269    13.01297  7231.79529  7364.14210     0.00014      
   1270    13.02166  7237.80430  7388.36130     0.00014      
   1271    13.03034  7215.71571  7363.73000     0.00014      
   1272    13.03902  7156.86756  7295.05270     0.00014      
   1273    13.04771  7070.88666  7200.74760     0.00014      
   1274    13.05639  6975.87403  7092.14890     0.00014      
   1275    13.06508  6886.95562  7006.46000     0.00014      
   1276    13.07376  6812.90509  6934.20410     0.00014      
   1277    13.08244  6756.40781  6881.03810     0.00015      
   1278    13.09113  6715.78921  6848.26610     0.00015      
   1279    13.09981  6687.16119  6823.78860     0.00015      
   1280    13.10850  6666.31624  6808.76900     0.00015      
   1281    13.11718  6649.82025  6799.51810     0.00015      
   1282    13.12586  6635.73702  6787.36770     0.00015      
   1283    13.13455  6624.21999  6784.18020     0.00015      
   1284    13.14323  6617.89097  6787.26900     0.00015      
   1285    13.15192  6620.43657  6805.26420     0.00015      
   1286    13.16060  6636.25030  6857.11080     0.00015      
   1287    13.16929  6668.84268  6937.69920     0.00014      
   1288    13.17797  6718.69832  7055.33790     0.00014      
   1289    13.18665  6781.05504  7197.09520     0.00014      
   1290    13.19534  6844.51910  7328.92870     0.00014      
   1291    13.20402  6891.42143  7407.09420     0.00014      
   1292    13.21271  6904.20542  7400.86620     0.00014      
   1293    13.22139  6878.53866  7314.59420     0.00014      
   1294    13.23007  6829.55893  7198.89260     0.00014      
   1295    13.23876  6780.22641  7072.33400     0.00014      
   1296    13.24744  6749.99069  6972.83540     0.00014      
   1297    13.25612  6751.47926  6913.96190     0.00014      
   1298    13.26481  6790.39650  6897.34230     0.00014      
   1299    13.27349  6866.46485  6923.58060     0.00014      
   1300    13.28218  6975.52630  6993.72800     0.00014      
   1301    13.29086  7112.03885  7112.31250     0.00014      
   1302    13.29954  7267.55492  7282.57910     0.00014      
   1303    13.30823  7424.52955  7476.78860     0.00013      
   1304    13.31691  7551.17181  7619.45650     0.00013      
   1305    13.32560  7606.54332  7660.56690     0.00013      
   1306    13.33428  7564.09196  7568.98050     0.00013      
   1307    13.34296  7434.64150  7395.33110     0.00014      
   1308    13.35165  7256.78507  7186.07860     0.00014      
   1309    13.36033  7069.77114  6976.75680     0.00014      
   1310    13.36902  6900.50032  6813.72850     0.00015      
   1311    13.37770  6764.66042  6688.02490     0.00015      
   1312    13.38638  6670.95815  6609.96240     0.00015      
   1313    13.39507  6625.20747  6575.75930     0.00015      
   1314    13.40375  6633.19249  6573.87010     0.00015      
   1315    13.41244  6701.56465  6612.79980     0.00015      
   1316    13.42112  6835.84665  6687.53270     0.00015      
   1317    13.42981  7035.60472  6804.02100     0.00015      
   1318    13.43849  7288.27221  6955.46920     0.00014      
   1319    13.44717  7564.03877  7130.24710     0.00014      
   1320    13.45586  7813.81776  7296.43260     0.00014      
   1321    13.46454  7977.49415  7440.70800     0.00013      
   1322    13.47322  8013.60885  7551.92140     0.00013      
   1323    13.48191  7936.22680  7656.69290     0.00013      
   1324    13.49059  7804.16767  7781.76320     0.00013      
   1325    13.49928  7670.56405  7914.75880     0.00013      
   1326    13.50796  7553.78528  8013.68650     0.00012      
   1327    13.51664  7439.93536  8021.53960     0.00012      
   1328    13.52533  7306.13991  7905.68070     0.00013      
   1329    13.53401  7145.61480  7704.06400     0.00013      
   1330    13.54270  6973.24569  7439.96580     0.00013      
   1331    13.55138  6816.95102  7198.72220     0.00014      
   1332    13.56006  6704.21765  7016.79740     0.00014      
   1333    13.56875  6653.01157  6913.50050     0.00014      
   1334    13.57743  6668.98787  6912.00100     0.00014      
   1335    13.58612  6744.95409  6999.82520     0.00014      
   1336    13.59480  6860.97397  7148.85300     0.00014      
   1337    13.60348  6984.89496  7296.30080     0.00014      
   1338    13.61217  7076.14677  7380.38330     0.00014      
   1339    13.62085  7100.58846  7361.69290     0.00014      
   1340    13.62954  7050.74614  7248.56400     0.00014      
   1341    13.63822  6950.25451  7063.23880     0.00014      
   1342    13.64690  6838.28367  6876.39990     0.00015      
   1343    13.65559  6748.89289  6711.35600     0.00015      
   1344    13.66427  6699.34813  6584.33400     0.00015      
   1345    13.67296  6687.87099  6503.12450     0.00015      
   1346    13.68164  6696.38730  6448.61080     0.00016      
   1347    13.69033  6698.09839  6411.93990     0.00016      
   1348    13.69901  6674.18492  6388.77540     0.00016      
   1349    13.70769  6628.03018  6364.98630     0.00016      
   1350    13.71638  6575.34048  6352.39600     0.00016      
   1351    13.72506  6526.38321  6341.22710     0.00016      
   1352    13.73375  6479.32525  6321.49950     0.00016      
   1353    13.74243  6424.47663  6300.26710     0.00016      
   1354    13.75111  6356.29438  6263.70560     0.00016      
   1355    13.75980  6279.93995  6225.53810     0.00016      
   1356    13.76848  6206.61137  6193.13570     0.00016      
   1357    13.77716  6144.42282  6158.79930     0.00016      
   1358    13.78585  6098.05792  6137.73290     0.00016      
   1359    13.79453  6068.83599  6119.84280     0.00016      
   1360    13.80322  6055.70160  6109.62650     0.00016      
   1361    13.81190  6056.65944  6112.35010     0.00016      
   1362    13.82058  6070.05067  6120.15190     0.00016      
   1363    13.82927  6095.65041  6138.12550     0.00016      
   1364    13.83795  6135.75009  6168.76660     0.00016      
   1365    13.84664  6196.51423  6214.27730     0.00016      
   1366    13.85532  6289.98818  6294.41600     0.00016      
   1367    13.86400  6434.95929  6418.31300     0.00016      
   1368    13.87269  6652.28754  6621.89890     0.00015      
   1369    13.88137  6955.17821  6938.39110     0.00014      
   1370    13.89006  7339.92951  7406.73390     0.00014      
   1371    13.89874  7780.56297  7949.92820     0.00013      
   1372    13.90742  8227.52112  8458.18070     0.00012      
   1373    13.91611  8620.02056  8846.81640     0.00011      
   1374    13.92479  8932.72458  9114.12600     0.00011      
   1375    13.93348  9208.62040  9346.22950     0.00011      
   1376    13.94216  9509.23341  9604.75780     0.00010      
   1377    13.95084  9851.32851  9913.03710     0.00010      
   1378    13.95953 10206.01894 10244.13900     0.00010      
   1379    13.96821 10542.00819 10567.64900     0.00009      
   1380    13.97690 10837.40681 10880.92200     0.00009      
   1381    13.98558 11059.23125 11127.81300     0.00009      
   1382    13.99427 11147.72177 11192.69000     0.00009      
   1383    14.00295 11022.84846 10981.29900     0.00009      
   1384    14.01163 10666.24319 10499.67800     0.00010      
   1385    14.02032 10178.40311  9922.69530     0.00010      
   1386    14.02900  9698.99103  9341.70120     0.00011      
   1387    14.03768  9303.46937  8858.27050     0.00011      
   1388    14.04637  8974.91422  8465.16990     0.00012      
   1389    14.05505  8639.81750  8098.97220     0.00012      
   1390    14.06374  8250.16090  7759.49900     0.00013      
   1391    14.07242  7831.40299  7444.48830     0.00013      
   1392    14.08110  7441.10823  7188.15190     0.00014      
   1393    14.08979  7120.64022  7018.17380     0.00014      
   1394    14.09847  6881.31750  6897.09960     0.00014      
   1395    14.10716  6707.26879  6793.99800     0.00015      
   1396    14.11584  6569.62830  6677.56640     0.00015      
   1397    14.12452  6447.29707  6532.15670     0.00015      
   1398    14.13321  6334.96542  6390.70700     0.00016      
   1399    14.14189  6234.66330  6259.20070     0.00016      
   1400    14.15058  6147.78478  6146.95310     0.00016      
   1401    14.15926  6074.61358  6064.65330     0.00016      
   1402    14.16794  6018.02079  6002.35160     0.00017      
   1403    14.17663  5984.85994  5966.56250     0.00017      
   1404    14.18531  5983.05424  5961.41700     0.00017      
   1405    14.19400  6018.12870  5981.73930     0.00017      
   1406    14.20268  6089.92541  6036.09380     0.00017      
   1407    14.21137  6189.21614  6116.41060     0.00016      
   1408    14.22005  6295.50447  6203.34860     0.00016      
   1409    14.22873  6377.53340  6269.10740     0.00016      
   1410    14.23742  6402.42146  6286.42870     0.00016      
   1411    14.24610  6358.59247  6254.13230     0.00016      
   1412    14.25479  6268.34661  6196.95750     0.00016      
   1413    14.26347  6170.78231  6130.21970     0.00016      
   1414    14.27215  6102.95456  6095.57710     0.00016      
   1415    14.28084  6094.35358  6107.31540     0.00016      
   1416    14.28952  6165.79932  6179.06740     0.00016      
   1417    14.29820  6327.26595  6329.67920     0.00016      
   1418    14.30689  6573.81952  6563.14110     0.00015      
   1419    14.31557  6879.72450  6865.12210     0.00015      
   1420    14.32426  7194.11373  7175.99610     0.00014      
   1421    14.33294  7447.36755  7439.17680     0.00013      
   1422    14.34162  7576.26530  7567.31690     0.00013      
   1423    14.35031  7552.40009  7540.60890     0.00013      
   1424    14.35899  7402.04095  7377.22360     0.00014      
   1425    14.36768  7205.46577  7183.32960     0.00014      
   1426    14.37636  7056.53239  7013.18900     0.00014      
   1427    14.38504  7024.34930  6945.53470     0.00014      
   1428    14.39373  7140.30016  7022.88090     0.00014      
   1429    14.40241  7397.07573  7256.53370     0.00014      
   1430    14.41110  7752.72008  7602.62160     0.00013      
   1431    14.41978  8134.76785  7999.10600     0.00013      
   1432    14.42846  8451.44939  8392.59960     0.00012      
   1433    14.43715  8634.08303  8745.73930     0.00011      
   1434    14.44583  8676.57352  9041.35450     0.00011      
   1435    14.45452  8602.01503  9193.89360     0.00011      
   1436    14.46320  8411.07152  9142.80270     0.00011      
   1437    14.47189  8100.53876  8851.20210     0.00011      
   1438    14.48057  7714.47235  8424.30660     0.00012      
   1439    14.48925  7330.60114  7956.27050     0.00013      
   1440    14.49794  7009.24025  7513.98880     0.00013      
   1441    14.50662  6773.77023  7164.52000     0.00014      
   1442    14.51531  6618.08880  6877.61670     0.00015      
   1443    14.52399  6527.70891  6661.70850     0.00015      
   1444    14.53267  6502.00906  6511.86470     0.00015      
   1445    14.54136  6553.15499  6428.90190     0.00016      
   1446    14.55004  6688.00596  6417.14310     0.00016      
   1447    14.55872  6894.50888  6457.08840     0.00015      
   1448    14.56741  7138.82848  6526.46140     0.00015      
   1449    14.57609  7371.98079  6606.38090     0.00015      
   1450    14.58478  7535.97722  6675.23290     0.00015      
   1451    14.59346  7582.41611  6746.20410     0.00015      
   1452    14.60214  7518.00467  6849.50980     0.00015      
   1453    14.61083  7408.78864  7018.36720     0.00014      
   1454    14.61951  7320.86980  7253.64700     0.00014      
   1455    14.62820  7275.92900  7500.26460     0.00013      
   1456    14.63688  7243.50640  7657.83500     0.00013      
   1457    14.64556  7160.68542  7656.66650     0.00013      
   1458    14.65425  6985.27089  7470.10060     0.00013      
   1459    14.66293  6738.44358  7165.68070     0.00014      
   1460    14.67162  6480.59303  6829.40920     0.00015      
   1461    14.68030  6268.70920  6512.95460     0.00015      
   1462    14.68898  6138.50260  6271.82520     0.00016      
   1463    14.69767  6100.01656  6109.30470     0.00016      
   1464    14.70635  6137.79257  6024.01220     0.00017      
   1465    14.71504  6214.67214  5994.33300     0.00017      
   1466    14.72372  6278.96467  5979.16990     0.00017      
   1467    14.73241  6281.07989  5963.66750     0.00017      
   1468    14.74109  6203.50854  5936.88180     0.00017      
   1469    14.74977  6071.36961  5899.21440     0.00017      
   1470    14.75846  5926.82530  5864.96340     0.00017      
   1471    14.76714  5805.57123  5830.23730     0.00017      
   1472    14.77582  5730.42483  5806.95560     0.00017      
   1473    14.78451  5711.38849  5812.03080     0.00017      
   1474    14.79319  5747.00693  5851.33690     0.00017      
   1475    14.80188  5826.26694  5925.77880     0.00017      
   1476    14.81056  5929.79813  6011.74070     0.00017      
   1477    14.81924  6032.20630  6087.27100     0.00016      
   1478    14.82793  6110.74877  6141.98140     0.00016      
   1479    14.83661  6154.37100  6165.93800     0.00016      
   1480    14.84530  6156.54971  6148.44340     0.00016      
   1481    14.85398  6106.78731  6089.83060     0.00016      
   1482    14.86266  6002.40110  5981.07370     0.00017      
   1483    14.87135  5861.37520  5852.97800     0.00017      
   1484    14.88003  5711.92183  5726.69780     0.00017      
   1485    14.88872  5576.69164  5611.18600     0.00018      
   1486    14.89740  5467.80300  5524.94680     0.00018      
   1487    14.90608  5388.34137  5454.05220     0.00018      
   1488    14.91477  5335.35287  5408.40770     0.00018      
   1489    14.92345  5303.30433  5384.19430     0.00019      
   1490    14.93214  5286.62073  5370.04300     0.00019      
   1491    14.94082  5281.70865  5372.70120     0.00019      
   1492    14.94950  5287.70349  5388.21140     0.00019      
   1493    14.95819  5306.52767  5417.16110     0.00018      
   1494    14.96687  5342.28186  5461.18360     0.00018      
   1495    14.97556  5399.82165  5512.39550     0.00018      
   1496    14.98424  5482.37532  5575.51370     0.00018      
   1497    14.99293  5588.29142  5653.35500     0.00018      
   1498    15.00161  5708.10808  5745.29200     0.00017      
   1499    15.01029  5821.98135  5831.83540     0.00017      
   1500    15.01898  5899.89450  5883.41990     0.00017      
   1501    15.02766  5912.12780  5876.08690     0.00017      
   1502    15.03635  5852.47062  5822.11130     0.00017      
   1503    15.04503  5746.05712  5732.44290     0.00017      
   1504    15.05371  5629.06797  5646.26070     0.00018      
   1505    15.06240  5531.99123  5587.93310     0.00018      
   1506    15.07108  5476.84239  5567.81010     0.00018      
   1507    15.07976  5478.85521  5607.17770     0.00018      
   1508    15.08845  5548.07853  5708.40770     0.00018      
   1509    15.09713  5688.70736  5888.22850     0.00017      
   1510    15.10582  5895.29395  6147.87110     0.00016      
   1511    15.11450  6147.14387  6481.37650     0.00015      
   1512    15.12318  6403.44085  6814.98340     0.00015      
   1513    15.13187  6604.45831  7049.70210     0.00014      
   1514    15.14055  6686.35199  7112.80910     0.00014      
   1515    15.14924  6621.12805  6997.21730     0.00014      
   1516    15.15792  6441.06278  6745.86380     0.00015      
   1517    15.16660  6213.60040  6433.03910     0.00016      
   1518    15.17529  6007.49987  6149.88770     0.00016      
   1519    15.18397  5873.80366  5917.64500     0.00017      
   1520    15.19266  5838.91669  5771.54490     0.00017      
   1521    15.20134  5903.42793  5705.48630     0.00018      
   1522    15.21002  6043.21808  5700.94290     0.00018      
   1523    15.21871  6211.93801  5733.68410     0.00017      
   1524    15.22739  6345.37270  5760.84230     0.00017      
   1525    15.23608  6378.84087  5755.44340     0.00017      
   1526    15.24476  6286.37456  5711.66800     0.00018      
   1527    15.25344  6100.16827  5632.15580     0.00018      
   1528    15.26213  5877.93667  5550.35640     0.00018      
   1529    15.27081  5667.77907  5476.96730     0.00018      
   1530    15.27950  5498.79573  5423.59180     0.00018      
   1531    15.28818  5383.34097  5404.53520     0.00019      
   1532    15.29687  5323.39833  5421.57860     0.00018      
   1533    15.30555  5318.67673  5492.32130     0.00018      
   1534    15.31423  5373.35063  5629.18070     0.00018      
   1535    15.32292  5497.84024  5855.64110     0.00017      
   1536    15.33160  5708.86419  6190.16550     0.00016      
   1537    15.34028  6014.57500  6649.95360     0.00015      
   1538    15.34897  6405.03954  7241.88090     0.00014      
   1539    15.35765  6838.93649  7884.15480     0.00013      
   1540    15.36634  7238.43270  8475.79490     0.00012      
   1541    15.37502  7498.69651  8825.42580     0.00011      
   1542    15.38370  7526.53630  8829.04300     0.00011      
   1543    15.39239  7309.27673  8482.62500     0.00012      
   1544    15.40107  6934.18824  7946.91500     0.00013      
   1545    15.40976  6521.24203  7348.21580     0.00014      
   1546    15.41844  6164.47516  6816.55620     0.00015      
   1547    15.42712  5917.86956  6436.13480     0.00016      
   1548    15.43581  5798.39619  6203.99850     0.00016      
   1549    15.44449  5793.30049  6132.08890     0.00016      
   1550    15.45318  5869.22141  6163.08840     0.00016      
   1551    15.46186  5979.74916  6231.01320     0.00016      
   1552    15.47054  6074.69111  6279.03860     0.00016      
   1553    15.47923  6119.83358  6277.92680     0.00016      
   1554    15.48791  6110.73027  6226.72270     0.00016      
   1555    15.49660  6055.79835  6140.58200     0.00016      
   1556    15.50528  5957.37675  6010.64840     0.00017      
   1557    15.51396  5819.89219  5859.67090     0.00017      
   1558    15.52265  5663.66023  5695.75100     0.00018      
   1559    15.53133  5515.81737  5537.33500     0.00018      
   1560    15.54002  5394.93031  5416.38920     0.00018      
   1561    15.54870  5307.12480  5323.32470     0.00019      
   1562    15.55738  5248.28331  5260.77100     0.00019      
   1563    15.56607  5207.84718  5215.92090     0.00019      
   1564    15.57475  5174.84874  5175.48290     0.00019      
   1565    15.58344  5144.31582  5145.55620     0.00019      
   1566    15.59212  5118.23975  5116.99510     0.00020      
   1567    15.60080  5101.18710  5091.63330     0.00020      
   1568    15.60949  5096.21541  5076.26220     0.00020      
   1569    15.61817  5103.16765  5065.33740     0.00020      
   1570    15.62686  5117.57164  5064.68070     0.00020      
   1571    15.63554  5131.07305  5062.87400     0.00020      
   1572    15.64422  5133.63400  5056.13430     0.00020      
   1573    15.65291  5119.39222  5046.89360     0.00020      
   1574    15.66159  5091.19626  5033.40480     0.00020      
   1575    15.67028  5057.02242  5018.41550     0.00020      
   1576    15.67896  5024.23990  5005.04100     0.00020      
   1577    15.68764  4997.50390  4992.41410     0.00020      
   1578    15.69633  4978.76929  4986.19870     0.00020      
   1579    15.70501  4968.04562  4981.53080     0.00020      
   1580    15.71370  4964.18415  4974.12160     0.00020      
   1581    15.72238  4965.91263  4972.87600     0.00020      
   1582    15.73106  4972.40749  4972.09720     0.00020      
   1583    15.73975  4983.80479  4975.27930     0.00020      
   1584    15.74843  5001.76465  4982.72170     0.00020      
   1585    15.75712  5030.53447  4996.96680     0.00020      
   1586    15.76580  5078.75642  5030.22900     0.00020      
   1587    15.77448  5161.76208  5091.94630     0.00020      
   1588    15.78317  5303.06543  5202.75240     0.00019      
   1589    15.79185  5532.91010  5386.69780     0.00019      
   1590    15.80054  5880.96347  5682.48580     0.00018      
   1591    15.80922  6364.81504  6136.67290     0.00016      
   1592    15.81790  6971.97773  6784.90530     0.00015      
   1593    15.82659  7646.15611  7583.06640     0.00013      
   1594    15.83527  8277.39208  8361.06050     0.00012      
   1595    15.84396  8717.29596  8938.63280     0.00011      
   1596    15.85264  8857.39528  9165.00200     0.00011      
   1597    15.86132  8714.08781  9027.29000     0.00011      
   1598    15.87001  8390.96515  8623.11720     0.00012      
   1599    15.87869  7997.94524  8114.57320     0.00012      
   1600    15.88738  7639.34363  7604.24850     0.00013      
   1601    15.89606  7409.63676  7194.91600     0.00014      
   1602    15.90474  7357.73967  6964.88530     0.00014      
   1603    15.91343  7463.88489  6915.48000     0.00014      
   1604    15.92211  7643.19007  6998.66460     0.00014      
   1605    15.93080  7767.74857  7106.97070     0.00014      
   1606    15.93948  7713.86238  7111.36130     0.00014      
   1607    15.94816  7436.37376  6957.04590     0.00014      
   1608    15.95685  6999.38191  6648.95170     0.00015      
   1609    15.96553  6513.88402  6273.54880     0.00016      
   1610    15.97422  6072.37836  5919.58350     0.00017      
   1611    15.98290  5730.86059  5625.00200     0.00018      
   1612    15.99158  5512.26431  5429.10990     0.00018      
   1613    16.00027  5414.80511  5332.37990     0.00019      
   1614    16.00895  5420.76147  5324.88130     0.00019      
   1615    16.01763  5502.58287  5405.36870     0.00019      
   1616    16.02632  5625.22712  5541.23730     0.00018      
   1617    16.03500  5745.88438  5684.31590     0.00018      
   1618    16.04369  5817.74583  5786.99370     0.00017      
   1619    16.05237  5809.71016  5811.41060     0.00017      
   1620    16.06106  5731.71050  5768.59670     0.00017      
   1621    16.06974  5627.10944  5681.82710     0.00018      
   1622    16.07842  5542.40066  5611.81930     0.00018      
   1623    16.08711  5509.34886  5600.89840     0.00018      
   1624    16.09579  5538.56956  5664.54200     0.00018      
   1625    16.10448  5619.20798  5794.14060     0.00017      
   1626    16.11316  5721.33014  5941.27200     0.00017      
   1627    16.12184  5803.78453  6049.65230     0.00017      
   1628    16.13053  5835.38310  6081.16110     0.00016      
   1629    16.13921  5820.28354  6030.91800     0.00017      
   1630    16.14790  5791.20429  5935.33540     0.00017      
   1631    16.15658  5779.82554  5840.10250     0.00017      
   1632    16.16526  5800.16489  5763.67140     0.00017      
   1633    16.17395  5847.45665  5710.77200     0.00018      
   1634    16.18263  5910.09402  5665.21580     0.00018      
   1635    16.19132  5984.09649  5614.87740     0.00018      
   1636    16.20000  6066.03089  5570.79100     0.00018      
   1637    16.20868  6134.65379  5524.13230     0.00018      
   1638    16.21737  6147.89182  5474.20610     0.00018      
   1639    16.22605  6067.81123  5408.24120     0.00018      
   1640    16.23474  5898.36830  5322.84130     0.00019      
   1641    16.24342  5683.17046  5239.93410     0.00019      
   1642    16.25210  5469.23955  5171.74370     0.00019      
   1643    16.26079  5286.44587  5128.59380     0.00019      
   1644    16.26947  5145.71953  5106.83200     0.00020      
   1645    16.27816  5043.21049  5087.78030     0.00020      
   1646    16.28684  4968.40667  5060.91110     0.00020      
   1647    16.29553  4912.78669  5022.37010     0.00020      
   1648    16.30421  4872.59662  4977.11040     0.00020      
   1649    16.31289  4847.35941  4943.02540     0.00020      
   1650    16.32157  4839.03890  4927.64750     0.00020      
   1651    16.33026  4851.49695  4939.61040     0.00020      
   1652    16.33894  4889.66523  4984.01610     0.00020      
   1653    16.34763  4957.75911  5059.95560     0.00020      
   1654    16.35631  5056.55558  5171.14700     0.00019      
   1655    16.36500  5180.27009  5310.69920     0.00019      
   1656    16.37368  5313.55466  5455.75100     0.00018      
   1657    16.38236  5429.53265  5574.63480     0.00018      
   1658    16.39105  5493.19411  5616.23630     0.00018      
   1659    16.39973  5478.50072  5574.86430     0.00018      
   1660    16.40842  5391.17510  5461.18550     0.00018      
   1661    16.41710  5264.90792  5319.09620     0.00019      
   1662    16.42578  5136.62807  5189.41700     0.00019      
   1663    16.43447  5031.95068  5095.15090     0.00020      
   1664    16.44315  4962.99258  5051.24170     0.00020      
   1665    16.45184  4929.67454  5056.88920     0.00020      
   1666    16.46052  4922.70136  5094.83740     0.00020      
   1667    16.46920  4927.37648  5144.13180     0.00019      
   1668    16.47789  4929.05124  5170.15280     0.00019      
   1669    16.48657  4921.04381  5157.67430     0.00019      
   1670    16.49526  4908.42228  5118.25440     0.00020      
   1671    16.50394  4902.02260  5076.17430     0.00020      
   1672    16.51263  4910.95823  5061.25730     0.00020      
   1673    16.52131  4939.57788  5087.31200     0.00020      
   1674    16.52999  4986.45008  5153.68160     0.00019      
   1675    16.53868  5045.29984  5249.58540     0.00019      
   1676    16.54736  5107.76405  5344.79590     0.00019      
   1677    16.55604  5168.74595  5427.76560     0.00018      
   1678    16.56473  5230.07378  5497.74560     0.00018      
   1679    16.57341  5295.77638  5569.98390     0.00018      
   1680    16.58210  5362.72104  5647.77340     0.00018      
   1681    16.59078  5417.61844  5714.51560     0.00017      
   1682    16.59946  5446.59908  5748.56540     0.00017      
   1683    16.60815  5454.11897  5757.20650     0.00017      
   1684    16.61683  5465.37656  5765.52440     0.00017      
   1685    16.62552  5505.69176  5816.94140     0.00017      
   1686    16.63420  5582.80395  5924.52490     0.00017      
   1687    16.64288  5681.25608  6062.05180     0.00016      
   1688    16.65157  5766.08711  6188.23240     0.00016      
   1689    16.66025  5798.44442  6235.59230     0.00016      
   1690    16.66894  5753.03308  6180.48540     0.00016      
   1691    16.67762  5629.55376  6029.72170     0.00017      
   1692    16.68630  5456.65686  5819.33110     0.00017      
   1693    16.69499  5275.15914  5603.68160     0.00018      
   1694    16.70367  5117.15059  5419.36820     0.00018      
   1695    16.71236  4999.62125  5288.60550     0.00019      
   1696    16.72104  4926.81324  5221.78130     0.00019      
   1697    16.72972  4894.62184  5197.98390     0.00019      
   1698    16.73841  4895.61783  5199.79200     0.00019      
   1699    16.74709  4924.03085  5205.59720     0.00019      
   1700    16.75578  4978.71376  5210.45210     0.00019      
   1701    16.76446  5060.52477  5229.91410     0.00019      
   1702    16.77314  5166.35958  5276.72410     0.00019      
   1703    16.78183  5284.97159  5354.35010     0.00019      
   1704    16.79051  5395.84664  5437.46880     0.00018      
   1705    16.79920  5474.50441  5484.41850     0.00018      
   1706    16.80788  5509.90758  5472.45610     0.00018      
   1707    16.81657  5520.43084  5405.48290     0.00018      
   1708    16.82525  5543.03390  5319.77340     0.00019      
   1709    16.83393  5610.46878  5255.46970     0.00019      
   1710    16.84261  5740.14573  5240.73390     0.00019      
   1711    16.85130  5932.08641  5292.80960     0.00019      
   1712    16.85998  6172.10867  5419.13430     0.00018      
   1713    16.86867  6446.49766  5628.91700     0.00018      
   1714    16.87735  6762.26796  5939.90970     0.00017      
   1715    16.88604  7144.36359  6363.97310     0.00016      
   1716    16.89472  7612.40561  6920.60550     0.00014      
   1717    16.90340  8163.83454  7601.08980     0.00013      
   1718    16.91209  8770.00057  8419.19140     0.00012      
   1719    16.92077  9370.59982  9320.00200     0.00011      
   1720    16.92946  9864.22779 10179.04300     0.00010      
   1721    16.93814 10143.08377 10838.52800     0.00009      
   1722    16.94682 10146.63731 11152.90000     0.00009      
   1723    16.95551  9866.36795 11023.29500     0.00009      
   1724    16.96419  9335.84554 10471.37300     0.00010      
   1725    16.97288  8648.51503  9592.92190     0.00010      
   1726    16.98156  7947.13174  8629.33790     0.00012      
   1727    16.99024  7356.66215  7767.46880     0.00013      
   1728    16.99893  6942.24615  7129.01270     0.00014      
   1729    17.00761  6713.05268  6715.86080     0.00015      
   1730    17.01630  6639.00589  6520.65530     0.00015      
   1731    17.02498  6660.91534  6486.58200     0.00015      
   1732    17.03366  6702.21831  6568.97560     0.00015      
   1733    17.04235  6700.59920  6705.12700     0.00015      
   1734    17.05103  6646.06066  6823.50980     0.00015      
   1735    17.05972  6578.92166  6881.95310     0.00015      
   1736    17.06840  6559.20193  6869.35550     0.00015      
   1737    17.07708  6644.76179  6825.23880     0.00015      
   1738    17.08577  6872.64720  6833.39790     0.00015      
   1739    17.09445  7238.88823  6958.60060     0.00014      
   1740    17.10314  7684.39998  7221.10500     0.00014      
   1741    17.11182  8091.02010  7517.17240     0.00013      
   1742    17.12050  8300.61025  7706.66410     0.00013      
   1743    17.12919  8194.23598  7663.95950     0.00013      
   1744    17.13787  7792.90933  7357.09770     0.00014      
   1745    17.14656  7236.35274  6881.56150     0.00015      
   1746    17.15524  6674.64770  6381.66500     0.00016      
   1747    17.16392  6208.39199  5962.90920     0.00017      
   1748    17.17261  5881.28979  5679.65330     0.00018      
   1749    17.18129  5686.76037  5507.28520     0.00018      
   1750    17.18998  5581.47700  5416.58640     0.00018      
   1751    17.19866  5505.35489  5350.30810     0.00019      
   1752    17.20734  5409.90689  5259.47510     0.00019      
   1753    17.21603  5280.78401  5140.03960     0.00019      
   1754    17.22471  5133.16026  4999.87700     0.00020      
   1755    17.23340  4990.12999  4865.32570     0.00021      
   1756    17.24208  4868.85060  4746.65920     0.00021      
   1757    17.25077  4776.99681  4654.81250     0.00021      
   1758    17.25945  4713.75440  4590.82670     0.00022      
   1759    17.26813  4672.55142  4549.34810     0.00022      
   1760    17.27681  4645.39914  4523.48390     0.00022      
   1761    17.28550  4626.99613  4512.13130     0.00022      
   1762    17.29418  4615.58523  4508.13230     0.00022      
   1763    17.30287  4611.55022  4514.32860     0.00022      
   1764    17.31155  4617.09169  4523.08250     0.00022      
   1765    17.32024  4637.72838  4540.13040     0.00022      
   1766    17.32892  4683.83629  4567.52150     0.00022      
   1767    17.33761  4769.14139  4613.95950     0.00022      
   1768    17.34629  4905.88735  4687.18070     0.00021      
   1769    17.35497  5098.55580  4797.17680     0.00021      
   1770    17.36366  5337.09264  4949.94340     0.00020      
   1771    17.37234  5591.47607  5145.97070     0.00019      
   1772    17.38102  5808.69108  5344.72800     0.00019      
   1773    17.38971  5921.79168  5490.55030     0.00018      
   1774    17.39839  5884.76718  5524.88870     0.00018      
   1775    17.40708  5710.66929  5430.54830     0.00018      
   1776    17.41576  5459.17210  5246.43950     0.00019      
   1777    17.42444  5193.28324  5032.38620     0.00020      
   1778    17.43313  4956.16679  4836.74510     0.00021      
   1779    17.44181  4768.95526  4685.50240     0.00021      
   1780    17.45050  4635.31930  4572.93800     0.00022      
   1781    17.45918  4547.78406  4496.45120     0.00022      
   1782    17.46786  4494.43193  4447.77340     0.00022      
   1783    17.47655  4463.71560  4416.89940     0.00023      
   1784    17.48523  4446.92282  4402.41020     0.00023      
   1785    17.49392  4438.48013  4395.70070     0.00023      
   1786    17.50260  4435.35493  4395.12400     0.00023      
   1787    17.51128  4436.09989  4398.03760     0.00023      
   1788    17.51997  4440.34307  4401.55810     0.00023      
   1789    17.52865  4448.65736  4407.92820     0.00023      
   1790    17.53734  4462.81205  4418.28660     0.00023      
   1791    17.54602  4486.29239  4437.39310     0.00023      
   1792    17.55470  4525.30263  4472.77340     0.00022      
   1793    17.56339  4590.11524  4539.89790     0.00022      
   1794    17.57207  4696.01821  4651.17240     0.00021      
   1795    17.58076  4862.73994  4824.64210     0.00021      
   1796    17.58944  5109.64237  5085.50590     0.00020      
   1797    17.59812  5446.03253  5447.49900     0.00018      
   1798    17.60681  5858.92531  5926.42870     0.00017      
   1799    17.61549  6302.89852  6486.91940     0.00015      
   1800    17.62418  6695.23067  7046.92290     0.00014      
   1801    17.63286  6928.33753  7394.16210     0.00014      
   1802    17.64154  6917.97853  7422.84770     0.00013      
   1803    17.65023  6666.36480  7119.20360     0.00014      
   1804    17.65891  6261.35124  6608.50780     0.00015      
   1805    17.66760  5811.04037  6025.06050     0.00017      
   1806    17.67628  5396.45023  5528.54790     0.00018      
   1807    17.68496  5060.90265  5134.55710     0.00019      
   1808    17.69365  4816.33494  4860.70460     0.00021      
   1809    17.70233  4653.28397  4674.02640     0.00021      
   1810    17.71102  4552.26914  4556.17090     0.00022      
   1811    17.71970  4493.24193  4481.32570     0.00022      
   1812    17.72838  4460.72275  4436.63230     0.00023      
   1813    17.73707  4446.20759  4411.03470     0.00023      
   1814    17.74575  4447.75240  4402.78370     0.00023      
   1815    17.75444  4469.09048  4408.35450     0.00023      
   1816    17.76312  4518.92393  4429.80080     0.00023      
   1817    17.77181  4609.49682  4468.74710     0.00022      
   1818    17.78049  4753.28443  4531.70750     0.00022      
   1819    17.78917  4957.40654  4618.81450     0.00022      
   1820    17.79785  5216.28165  4742.01170     0.00021      
   1821    17.80654  5505.01573  4895.25150     0.00020      
   1822    17.81522  5774.43655  5058.90330     0.00020      
   1823    17.82391  5953.87212  5195.93120     0.00019      
   1824    17.83259  5979.01518  5259.46880     0.00019      
   1825    17.84128  5841.79068  5229.52690     0.00019      
   1826    17.84996  5596.96730  5122.32320     0.00020      
   1827    17.85864  5315.75621  4975.87500     0.00020      
   1828    17.86733  5053.12165  4823.97170     0.00021      
   1829    17.87601  4842.28477  4693.18550     0.00021      
   1830    17.88470  4697.47990  4597.93950     0.00022      
   1831    17.89338  4618.35889  4539.83980     0.00022      
   1832    17.90206  4594.95951  4523.04200     0.00022      
   1833    17.91075  4611.67857  4541.51660     0.00022      
   1834    17.91943  4649.55623  4579.85640     0.00022      
   1835    17.92812  4686.98799  4617.28710     0.00022      
   1836    17.93680  4702.33097  4634.88920     0.00022      
   1837    17.94548  4683.41565  4618.48390     0.00022      
   1838    17.95417  4636.23225  4573.00590     0.00022      
   1839    17.96285  4578.46912  4518.90820     0.00022      
   1840    17.97154  4527.15281  4477.02250     0.00022      
   1841    17.98022  4493.12704  4456.63620     0.00022      
   1842    17.98890  4480.11889  4464.15140     0.00022      
   1843    17.99759  4485.12684  4498.29440     0.00022      
   1844    18.00627  4499.56845  4549.74120     0.00022      
   1845    18.01496  4511.55966  4594.24270     0.00022      
   1846    18.02364  4510.43974  4612.21000     0.00022      
   1847    18.03232  4492.81231  4595.94530     0.00022      
   1848    18.04101  4463.78505  4553.70170     0.00022      
   1849    18.04969  4431.34972  4498.98630     0.00022      
   1850    18.05838  4401.68272  4450.06640     0.00022      
   1851    18.06706  4378.64812  4405.83980     0.00023      
   1852    18.07575  4364.72779  4371.59080     0.00023      
   1853    18.08443  4361.43273  4346.06880     0.00023      
   1854    18.09311  4369.60844  4330.52290     0.00023      
   1855    18.10179  4390.08518  4327.65190     0.00023      
   1856    18.11048  4424.22010  4337.91650     0.00023      
   1857    18.11916  4473.92529  4363.79640     0.00023      
   1858    18.12785  4542.58491  4410.26220     0.00023      
   1859    18.13653  4633.31326  4483.65530     0.00022      
   1860    18.14522  4749.03506  4597.21340     0.00022      
   1861    18.15390  4890.91139  4756.35110     0.00021      
   1862    18.16258  5056.28057  4971.44090     0.00020      
   1863    18.17127  5236.33828  5215.44380     0.00019      
   1864    18.17995  5415.08427  5462.07280     0.00018      
   1865    18.18864  5572.63563  5636.94140     0.00018      
   1866    18.19732  5694.98195  5700.65530     0.00018      
   1867    18.20600  5782.43491  5669.49070     0.00018      
   1868    18.21469  5844.08574  5592.35500     0.00018      
   1869    18.22337  5881.89849  5507.47950     0.00018      
   1870    18.23206  5881.09753  5437.58300     0.00018      
   1871    18.24074  5822.05125  5368.88280     0.00019      
   1872    18.24942  5701.23393  5285.81350     0.00019      
   1873    18.25811  5531.60420  5182.08540     0.00019      
   1874    18.26679  5333.81761  5052.18260     0.00020      
   1875    18.27548  5132.27138  4921.03860     0.00020      
   1876    18.28416  4948.91842  4797.04590     0.00021      
   1877    18.29285  4799.37583  4699.08980     0.00021      
   1878    18.30153  4691.16936  4631.89310     0.00022      
   1879    18.31021  4624.04465  4601.73290     0.00022      
   1880    18.31890  4593.65301  4605.31540     0.00022      
   1881    18.32758  4596.78993  4642.75830     0.00022      
   1882    18.33626  4634.44295  4719.34280     0.00021      
   1883    18.34495  4709.81226  4839.56100     0.00021      
   1884    18.35363  4824.60315  5018.51370     0.00020      
   1885    18.36232  4975.39276  5263.68850     0.00019      
   1886    18.37100  5150.94339  5555.42040     0.00018      
   1887    18.37968  5333.56700  5896.38920     0.00017      
   1888    18.38837  5502.49803  6228.61670     0.00016      
   1889    18.39705  5633.43228  6528.38720     0.00015      
   1890    18.40574  5694.79057  6716.07030     0.00015      
   1891    18.41442  5655.13231  6709.41600     0.00015      
   1892    18.42310  5510.08929  6481.84720     0.00015      
   1893    18.43179  5295.66146  6100.90820     0.00016      
   1894    18.44047  5065.54449  5662.29100     0.00018      
   1895    18.44916  4863.97887  5270.88180     0.00019      
   1896    18.45784  4716.55353  4982.70850     0.00020      
   1897    18.46652  4631.44180  4812.56050     0.00021      
   1898    18.47521  4602.66967  4737.10940     0.00021      
   1899    18.48389  4613.99041  4730.23830     0.00021      
   1900    18.49258  4642.74719  4755.80620     0.00021      
   1901    18.50126  4665.19146  4776.66990     0.00021      
   1902    18.50994  4667.18259  4769.05620     0.00021      
   1903    18.51863  4653.12511  4732.23100     0.00021      
   1904    18.52731  4639.27653  4681.11130     0.00021      
   1905    18.53600  4640.48583  4633.15380     0.00022      
   1906    18.54468  4663.87099  4609.15920     0.00022      
   1907    18.55336  4707.78700  4604.05080     0.00022      
   1908    18.56205  4765.02522  4614.73440     0.00022      
   1909    18.57073  4830.56418  4632.84180     0.00022      
   1910    18.57942  4903.53620  4661.95170     0.00021      
   1911    18.58810  4977.71648  4701.21390     0.00021      
   1912    18.59679  5033.08714  4736.88670     0.00021      
   1913    18.60547  5039.17084  4748.06930     0.00021      
   1914    18.61415  4975.56169  4712.63480     0.00021      
   1915    18.62283  4852.38439  4634.54440     0.00022      
   1916    18.63152  4700.98563  4538.79000     0.00022      
   1917    18.64020  4551.19256  4447.73580     0.00022      
   1918    18.64889  4421.99195  4375.18650     0.00023      
   1919    18.65757  4321.91084  4324.13530     0.00023      
   1920    18.66626  4251.39723  4291.75200     0.00023      
   1921    18.67494  4205.95054  4271.64600     0.00023      
   1922    18.68362  4179.20988  4261.33150     0.00023      
   1923    18.69231  4165.29450  4258.37650     0.00023      
   1924    18.70099  4160.02096  4257.63670     0.00023      
   1925    18.70968  4161.26596  4260.87740     0.00023      
   1926    18.71836  4169.03221  4269.30570     0.00023      
   1927    18.72704  4185.72899  4285.21090     0.00023      
   1928    18.73573  4216.79551  4310.73580     0.00023      
   1929    18.74441  4271.41329  4352.85060     0.00023      
   1930    18.75310  4362.49365  4427.00390     0.00023      
   1931    18.76178  4504.77648  4548.76220     0.00022      
   1932    18.77046  4710.45402  4745.60060     0.00021      
   1933    18.77915  4982.49090  5044.46970     0.00020      
   1934    18.78783  5307.34138  5458.75440     0.00018      
   1935    18.79652  5648.54620  5956.89010     0.00017      
   1936    18.80520  5943.78691  6418.31880     0.00016      
   1937    18.81388  6117.64512  6665.15630     0.00015      
   1938    18.82257  6124.69347  6605.96040     0.00015      
   1939    18.83125  5985.46424  6288.74270     0.00016      
   1940    18.83994  5763.71855  5840.52490     0.00017      
   1941    18.84862  5517.44809  5392.82670     0.00019      
   1942    18.85730  5275.61077  5051.23830     0.00020      
   1943    18.86599  5045.68953  4799.92580     0.00021      
   1944    18.87467  4833.16675  4638.66650     0.00022      
   1945    18.88336  4648.19672  4539.47070     0.00022      
   1946    18.89204  4498.59563  4485.10550     0.00022      
   1947    18.90072  4386.95035  4460.33010     0.00022      
   1948    18.90941  4312.84631  4449.23880     0.00022      
   1949    18.91809  4274.97225  4442.98190     0.00023      
   1950    18.92677  4272.02582  4434.55810     0.00023      
   1951    18.93546  4302.82919  4432.60250     0.00023      
   1952    18.94414  4365.33760  4446.12060     0.00022      
   1953    18.95283  4454.69944  4481.54100     0.00022      
   1954    18.96151  4560.68176  4534.42290     0.00022      
   1955    18.97020  4665.43526  4595.22560     0.00022      
   1956    18.97888  4745.16391  4649.27000     0.00022      
   1957    18.98756  4778.88322  4672.79300     0.00021      
   1958    18.99625  4757.39531  4657.89310     0.00021      
   1959    19.00493  4685.59783  4611.15770     0.00022      
   1960    19.01362  4581.88302  4545.94870     0.00022      
   1961    19.02230  4470.23987  4474.72900     0.00022      
   1962    19.03098  4369.42873  4412.65770     0.00023      
   1963    19.03967  4289.70146  4366.03130     0.00023      
   1964    19.04835  4234.17777  4334.89110     0.00023      
   1965    19.05703  4201.55237  4317.01270     0.00023      
   1966    19.06572  4188.87296  4309.55420     0.00023      
   1967    19.07440  4194.15330  4314.35890     0.00023      
   1968    19.08309  4218.68177  4330.23050     0.00023      
   1969    19.09177  4269.02689  4360.30470     0.00023      
   1970    19.10046  4358.45302  4414.28560     0.00023      
   1971    19.10914  4506.86828  4513.32520     0.00022      
   1972    19.11783  4737.86700  4686.78320     0.00021      
   1973    19.12651  5071.49772  4977.62890     0.00020      
   1974    19.13519  5514.22349  5445.58060     0.00018      
   1975    19.14388  6046.55590  6135.60550     0.00016      
   1976    19.15256  6612.39019  7038.50240     0.00014      
   1977    19.16124  7112.04218  7934.57130     0.00013      
   1978    19.16993  7419.18994  8538.01660     0.00012      
   1979    19.17861  7450.77809  8629.08890     0.00012      
   1980    19.18730  7232.10046  8212.34860     0.00012      
   1981    19.19598  6856.65511  7474.51900     0.00013      
   1982    19.20466  6413.07959  6692.44920     0.00015      
   1983    19.21335  5971.53992  6029.23580     0.00017      
   1984    19.22203  5592.30384  5511.88570     0.00018      
   1985    19.23072  5317.86903  5177.35110     0.00019      
   1986    19.23940  5164.18757  4991.47950     0.00020      
   1987    19.24808  5123.93963  4940.32320     0.00020      
   1988    19.25677  5171.88853  5000.58740     0.00020      
   1989    19.26545  5270.87923  5153.71970     0.00019      
   1990    19.27414  5381.44443  5368.33540     0.00019      
   1991    19.28282  5468.86392  5586.56790     0.00018      
   1992    19.29150  5502.80335  5729.85600     0.00017      
   1993    19.30019  5468.89879  5736.88870     0.00017      
   1994    19.30887  5391.31348  5608.26320     0.00018      
   1995    19.31756  5325.82526  5419.68510     0.00018      
   1996    19.32624  5327.91605  5256.46390     0.00019      
   1997    19.33492  5431.22153  5187.96970     0.00019      
   1998    19.34361  5639.34111  5237.98630     0.00019      
   1999    19.35229  5922.03938  5394.30220     0.00019      
   2000    19.36098  6214.35935  5586.81050     0.00018      
   2001    19.36966  6425.14125  5731.07910     0.00017      
   2002    19.37834  6476.95599  5765.14010     0.00017      
   2003    19.38703  6367.85235  5682.34080     0.00018      
   2004    19.39571  6173.83056  5530.91890     0.00018      
   2005    19.40440  5985.43075  5396.94290     0.00019      
   2006    19.41308  5862.44116  5334.12060     0.00019      
   2007    19.42176  5823.82806  5352.10990     0.00019      
   2008    19.43045  5851.26193  5423.15580     0.00018      
   2009    19.43913  5905.19741  5513.22070     0.00018      
   2010    19.44781  5956.70500  5602.83110     0.00018      
   2011    19.45650  6004.91010  5708.71780     0.00018      
   2012    19.46518  6061.54892  5863.58840     0.00017      
   2013    19.47387  6128.48610  6062.21040     0.00016      
   2014    19.48255  6189.09329  6251.81690     0.00016      
   2015    19.49124  6224.18270  6349.91750     0.00016      
   2016    19.49992  6240.31002  6336.77340     0.00016      
   2017    19.50860  6265.83914  6258.49170     0.00016      
   2018    19.51729  6320.04177  6193.10160     0.00016      
   2019    19.52597  6395.72836  6163.00150     0.00016      
   2020    19.53466  6461.96244  6134.90580     0.00016      
   2021    19.54334  6487.83947  6076.08400     0.00016      
   2022    19.55202  6469.89296  5982.96000     0.00017      
   2023    19.56071  6420.11183  5888.12010     0.00017      
   2024    19.56939  6334.23462  5796.96680     0.00017      
   2025    19.57807  6192.15533  5689.42040     0.00018      
   2026    19.58676  5992.11587  5549.93410     0.00018      
   2027    19.59544  5772.45859  5393.38870     0.00019      
   2028    19.60413  5589.86605  5276.76510     0.00019      
   2029    19.61281  5488.99190  5250.80910     0.00019      
   2030    19.62150  5491.46628  5340.82030     0.00019      
   2031    19.63018  5595.53210  5545.40230     0.00018      
   2032    19.63886  5776.77846  5835.33940     0.00017      
   2033    19.64755  5992.23226  6145.05320     0.00016      
   2034    19.65623  6190.20603  6407.17290     0.00016      
   2035    19.66492  6315.90642  6548.64360     0.00015      
   2036    19.67360  6326.80013  6509.91990     0.00015      
   2037    19.68228  6229.05915  6306.16210     0.00016      
   2038    19.69097  6085.14010  6038.28760     0.00017      
   2039    19.69965  5972.05573  5820.70950     0.00017      
   2040    19.70834  5945.07640  5739.18750     0.00017      
   2041    19.71702  6027.11612  5812.67630     0.00017      
   2042    19.72570  6209.16636  5998.75390     0.00017      
   2043    19.73439  6461.98180  6198.58940     0.00016      
   2044    19.74307  6761.57094  6363.14450     0.00016      
   2045    19.75175  7097.74667  6501.75390     0.00015      
   2046    19.76044  7445.84552  6648.16410     0.00015      
   2047    19.76912  7734.76189  6793.08790     0.00015      
   2048    19.77781  7856.64894  6873.23680     0.00015      
   2049    19.78649  7734.87821  6828.83500     0.00015      
   2050    19.79518  7386.75735  6646.56010     0.00015      
   2051    19.80386  6896.16055  6355.34670     0.00016      
   2052    19.81254  6357.66975  5995.88530     0.00017      
   2053    19.82123  5854.69957  5640.48290     0.00018      
   2054    19.82991  5445.87249  5349.10110     0.00019      
   2055    19.83860  5158.41510  5138.29830     0.00019      
   2056    19.84728  4995.72101  5017.82130     0.00020      
   2057    19.85596  4948.89025  4972.21680     0.00020      
   2058    19.86465  5001.54265  5000.44140     0.00020      
   2059    19.87333  5129.13439  5087.42190     0.00020      
   2060    19.88201  5297.80542  5213.04250     0.00019      
   2061    19.89070  5469.00328  5336.25780     0.00019      
   2062    19.89938  5612.52098  5433.66990     0.00018      
   2063    19.90807  5715.49331  5483.22610     0.00018      
   2064    19.91675  5785.43599  5491.27100     0.00018      
   2065    19.92544  5854.89782  5481.93700     0.00018      
   2066    19.93412  5965.59467  5514.20610     0.00018      
   2067    19.94280  6135.39390  5629.86470     0.00018      
   2068    19.95149  6339.34346  5841.13430     0.00017      
   2069    19.96017  6510.17131  6087.13770     0.00016      
   2070    19.96886  6559.97835  6270.93750     0.00016      
   2071    19.97754  6432.39914  6279.82860     0.00016      
   2072    19.98622  6150.23446  6098.64260     0.00016      
   2073    19.99491  5791.54685  5800.79590     0.00017      
   2074    20.00359  5432.02075  5485.20900     0.00018      
   2075    20.01228  5120.70672  5206.13380     0.00019      
   2076    20.02096  4881.64117  4998.85550     0.00020      
   2077    20.02964  4720.72135  4858.30620     0.00021      
   2078    20.03833  4629.26945  4773.07420     0.00021      
   2079    20.04701  4586.79094  4723.04300     0.00021      
   2080    20.05570  4566.93251  4683.57910     0.00021      
   2081    20.06438  4544.82977  4634.09420     0.00022      
   2082    20.07306  4503.90989  4565.21970     0.00022      
   2083    20.08175  4442.41648  4486.94730     0.00022      
   2084    20.09043  4372.20646  4414.44340     0.00023      
   2085    20.09912  4308.32109  4358.96880     0.00023      
   2086    20.10780  4261.42281  4327.06880     0.00023      
   2087    20.11648  4236.38368  4322.05320     0.00023      
   2088    20.12517  4232.88213  4341.82370     0.00023      
   2089    20.13385  4246.36333  4386.01860     0.00023      
   2090    20.14254  4268.82469  4448.04300     0.00022      
   2091    20.15122  4290.15494  4510.78270     0.00022      
   2092    20.15990  4300.86468  4553.28860     0.00022      
   2093    20.16859  4296.26151  4558.49800     0.00022      
   2094    20.17727  4278.85497  4525.70210     0.00022      
   2095    20.18596  4256.98436  4466.85110     0.00022      
   2096    20.19464  4241.72909  4408.52200     0.00023      
   2097    20.20332  4244.72726  4367.39700     0.00023      
   2098    20.21201  4276.54402  4357.15140     0.00023      
   2099    20.22069  4344.84375  4385.11230     0.00023      
   2100    20.22938  4451.96709  4457.47020     0.00022      
   2101    20.23806  4592.41335  4572.37790     0.00022      
   2102    20.24674  4750.97624  4723.58640     0.00021      
   2103    20.25543  4900.77703  4879.48340     0.00020      
   2104    20.26411  5004.58488  4988.59130     0.00020      
   2105    20.27279  5029.59874  5013.77390     0.00020      
   2106    20.28148  4971.29493  4941.54350     0.00020      
   2107    20.29016  4855.85810  4802.60350     0.00021      
   2108    20.29885  4717.06181  4647.43550     0.00022      
   2109    20.30753  4580.08445  4520.10990     0.00022      
   2110    20.31622  4462.00835  4436.92430     0.00023      
   2111    20.32490  4373.57881  4397.12940     0.00023      
   2112    20.33358  4317.28803  4394.55080     0.00023      
   2113    20.34227  4288.95147  4425.19430     0.00023      
   2114    20.35095  4282.11496  4479.10010     0.00022      
   2115    20.35964  4289.83900  4543.69190     0.00022      
   2116    20.36832  4305.67924  4599.04390     0.00022      
   2117    20.37700  4328.87647  4628.82760     0.00022      
   2118    20.38569  4369.31973  4647.58200     0.00022      
   2119    20.39437  4443.10898  4684.34080     0.00021      
   2120    20.40305  4563.26044  4777.61330     0.00021      
   2121    20.41174  4733.43828  4939.80420     0.00020      
   2122    20.42042  4944.01512  5171.68410     0.00019      
   2123    20.42911  5169.33439  5430.24660     0.00018      
   2124    20.43779  5373.15449  5640.49410     0.00018      
   2125    20.44648  5528.14192  5770.97310     0.00017      
   2126    20.45516  5628.93203  5822.54740     0.00017      
   2127    20.46384  5678.33823  5811.44530     0.00017      
   2128    20.47253  5678.38770  5760.54200     0.00017      
   2129    20.48121  5646.58641  5702.46920     0.00018      
   2130    20.48990  5619.46516  5675.41650     0.00018      
   2131    20.49858  5628.56035  5694.24460     0.00018      
   2132    20.50726  5684.15005  5755.64400     0.00017      
   2133    20.51595  5782.66437  5852.05960     0.00017      
   2134    20.52463  5919.04551  5988.20750     0.00017      
   2135    20.53332  6078.70276  6160.04690     0.00016      
   2136    20.54200  6220.86297  6336.42140     0.00016      
   2137    20.55068  6287.62800  6459.20460     0.00015      
   2138    20.55937  6243.55761  6483.08450     0.00015      
   2139    20.56805  6095.64858  6396.82860     0.00016      
   2140    20.57674  5872.29253  6215.23240     0.00016      
   2141    20.58542  5609.32950  5970.20700     0.00017      
   2142    20.59410  5347.59443  5700.85010     0.00018      
   2143    20.60279  5126.84948  5452.87500     0.00018      
   2144    20.61147  4980.04445  5268.28130     0.00019      
   2145    20.62016  4926.17809  5185.33540     0.00019      
   2146    20.62884  4964.71236  5219.54980     0.00019      
   2147    20.63752  5074.26140  5357.74560     0.00019      
   2148    20.64621  5214.99214  5560.65230     0.00018      
   2149    20.65489  5337.16960  5757.52930     0.00017      
   2150    20.66358  5392.18003  5873.22360     0.00017      
   2151    20.67226  5344.47546  5850.45120     0.00017      
   2152    20.68094  5191.32743  5679.45210     0.00018      
   2153    20.68963  4969.29174  5407.14260     0.00018      
   2154    20.69831  4730.54709  5098.45750     0.00020      
   2155    20.70699  4518.38838  4816.37450     0.00021      
   2156    20.71568  4360.09845  4600.57230     0.00022      
   2157    20.72436  4269.40783  4463.39700     0.00022      
   2158    20.73305  4250.18511  4403.78910     0.00023      
   2159    20.74173  4299.23155  4412.34280     0.00023      
   2160    20.75042  4407.49980  4476.59810     0.00022      
   2161    20.75910  4559.85240  4585.13920     0.00022      
   2162    20.76778  4733.66551  4711.84470     0.00021      
   2163    20.77647  4897.21412  4824.14400     0.00021      
   2164    20.78515  5014.41200  4886.42770     0.00020      
   2165    20.79384  5060.95638  4886.14600     0.00020      
   2166    20.80252  5031.64964  4824.53910     0.00021      
   2167    20.81120  4929.74629  4719.79830     0.00021      
   2168    20.81989  4767.24699  4593.18510     0.00022      
   2169    20.82857  4572.13469  4465.47900     0.00022      
   2170    20.83725  4377.49759  4356.74170     0.00023      
   2171    20.84594  4206.64958  4269.78270     0.00023      
   2172    20.85462  4070.34810  4204.16800     0.00024      
   2173    20.86331  3970.11801  4153.60110     0.00024      
   2174    20.87199  3902.29486  4114.97950     0.00024      
   2175    20.88068  3861.09056  4085.65480     0.00024      
   2176    20.88936  3840.78127  4062.19070     0.00025      
   2177    20.89804  3836.95531  4047.59350     0.00025      
   2178    20.90673  3846.76293  4038.25290     0.00025      
   2179    20.91541  3868.33979  4036.98270     0.00025      
   2180    20.92410  3899.73521  4040.35910     0.00025      
   2181    20.93278  3937.85445  4047.67160     0.00025      
   2182    20.94146  3978.18882  4059.18360     0.00025      
   2183    20.95015  4015.51437  4072.61280     0.00025      
   2184    20.95883  4044.08235  4088.39160     0.00024      
   2185    20.96752  4058.72284  4100.62300     0.00024      
   2186    20.97620  4058.94460  4113.13430     0.00024      
   2187    20.98488  4051.43922  4125.33890     0.00024      
   2188    20.99357  4046.54987  4142.29590     0.00024      
   2189    21.00225  4053.19237  4168.59330     0.00024      
   2190    21.01094  4076.58172  4210.53420     0.00024      
   2191    21.01962  4118.22031  4271.57570     0.00023      
   2192    21.02830  4177.06623  4345.61280     0.00023      
   2193    21.03699  4250.98428  4431.49120     0.00023      
   2194    21.04567  4338.02856  4516.56590     0.00022      
   2195    21.05436  4439.56395  4597.06880     0.00022      
   2196    21.06304  4563.35978  4672.66940     0.00021      
   2197    21.07172  4721.48626  4749.81350     0.00021      
   2198    21.08041  4924.99861  4835.73970     0.00021      
   2199    21.08909  5178.62385  4931.76950     0.00020      
   2200    21.09778  5475.34935  5042.96530     0.00020      
   2201    21.10646  5796.74147  5172.94630     0.00019      
   2202    21.11514  6117.69151  5324.49660     0.00019      
   2203    21.12383  6401.82003  5486.14110     0.00018      
   2204    21.13251  6596.01446  5633.21340     0.00018      
   2205    21.14120  6651.88834  5746.79980     0.00017      
   2206    21.14988  6563.13660  5821.71140     0.00017      
   2207    21.15856  6371.48513  5866.72070     0.00017      
   2208    21.16725  6133.66474  5880.08790     0.00017      
   2209    21.17593  5891.46248  5849.49660     0.00017      
   2210    21.18462  5668.54744  5759.43950     0.00017      
   2211    21.19330  5479.32004  5619.84080     0.00018      
   2212    21.20198  5334.48840  5464.91990     0.00018      
   2213    21.21067  5240.68274  5340.48880     0.00019      
   2214    21.21935  5197.97380  5270.73240     0.00019      
   2215    21.22803  5198.50048  5253.98000     0.00019      
   2216    21.23672  5227.32138  5263.99510     0.00019      
   2217    21.24540  5268.58323  5275.49800     0.00019      
   2218    21.25409  5314.67934  5274.28660     0.00019      
   2219    21.26277  5363.98391  5261.51170     0.00019      
   2220    21.27146  5407.10737  5230.25630     0.00019      
   2221    21.28014  5421.92765  5178.20650     0.00019      
   2222    21.28882  5391.00930  5102.22510     0.00020      
   2223    21.29751  5324.03983  5017.05760     0.00020      
   2224    21.30619  5250.30907  4941.82670     0.00020      
   2225    21.31488  5194.55264  4894.11470     0.00020      
   2226    21.32356  5167.02436  4884.46190     0.00020      
   2227    21.33224  5163.95244  4907.27440     0.00020      
   2228    21.34093  5168.34291  4938.82910     0.00020      
   2229    21.34961  5151.83813  4945.61820     0.00020      
   2230    21.35829  5084.56412  4900.04880     0.00020      
   2231    21.36698  4955.88341  4803.75440     0.00021      
   2232    21.37566  4785.18149  4676.01560     0.00021      
   2233    21.38435  4606.39233  4548.60300     0.00022      
   2234    21.39303  4447.12875  4444.84470     0.00022      
   2235    21.40172  4320.49277  4376.89600     0.00023      
   2236    21.41040  4225.44433  4338.04250     0.00023      
   2237    21.41908  4150.65684  4308.61080     0.00023      
   2238    21.42777  4082.71561  4272.93550     0.00023      
   2239    21.43645  4015.50769  4221.08840     0.00024      
   2240    21.44514  3951.52286  4161.29100     0.00024      
   2241    21.45382  3896.59190  4099.86570     0.00024      
   2242    21.46250  3856.35147  4051.91500     0.00025      
   2243    21.47119  3835.66839  4022.35180     0.00025      
   2244    21.47987  3838.83023  4015.05440     0.00025      
   2245    21.48856  3869.48645  4029.71410     0.00025      
   2246    21.49724  3930.02918  4068.01760     0.00025      
   2247    21.50592  4020.08795  4131.75540     0.00024      
   2248    21.51461  4134.33685  4218.17630     0.00024      
   2249    21.52329  4260.72200  4312.89110     0.00023      
   2250    21.53197  4380.45389  4399.06490     0.00023      
   2251    21.54066  4468.75499  4454.73100     0.00022      
   2252    21.54934  4499.20605  4467.88530     0.00022      
   2253    21.55803  4459.49068  4433.39160     0.00023      
   2254    21.56671  4365.13834  4366.21390     0.00023      
   2255    21.57540  4248.45155  4282.64650     0.00023      
   2256    21.58408  4139.00668  4205.56400     0.00024      
   2257    21.59276  4055.89286  4145.58400     0.00024      
   2258    21.60145  4007.96465  4114.77590     0.00024      
   2259    21.61013  3995.76285  4111.27730     0.00024      
   2260    21.61882  4014.03321  4129.89600     0.00024      
   2261    21.62750  4053.62212  4159.52980     0.00024      
   2262    21.63618  4102.11050  4189.13960     0.00024      
   2263    21.64487  4145.59059  4209.85110     0.00024      
   2264    21.65355  4173.86305  4218.80710     0.00024      
   2265    21.66223  4186.54853  4216.06490     0.00024      
   2266    21.67092  4196.16838  4211.86080     0.00024      
   2267    21.67960  4225.54184  4221.58300     0.00024      
   2268    21.68829  4300.68935  4270.17330     0.00023      
   2269    21.69697  4445.21600  4380.56930     0.00023      
   2270    21.70566  4675.91045  4582.10940     0.00022      
   2271    21.71434  4998.68718  4929.48580     0.00020      
   2272    21.72302  5404.29672  5462.67680     0.00018      
   2273    21.73171  5860.40241  6170.81790     0.00016      
   2274    21.74039  6300.61526  6925.91310     0.00014      
   2275    21.74908  6621.25694  7509.68460     0.00013      
   2276    21.75776  6714.20970  7752.68990     0.00013      
   2277    21.76644  6542.72989  7575.95170     0.00013      
   2278    21.77513  6176.18913  7065.02250     0.00014      
   2279    21.78381  5732.56469  6378.09670     0.00016      
   2280    21.79250  5316.21173  5697.22510     0.00018      
   2281    21.80118  4998.74407  5162.65970     0.00019      
   2282    21.80986  4821.96604  4856.04540     0.00021      
   2283    21.81855  4803.42608  4776.28420     0.00021      
   2284    21.82723  4940.14588  4900.93070     0.00020      
   2285    21.83592  5209.27240  5193.67330     0.00019      
   2286    21.84460  5566.51995  5600.53470     0.00018      
   2287    21.85328  5943.49602  6038.21920     0.00017      
   2288    21.86197  6249.14924  6398.28560     0.00016      
   2289    21.87065  6389.73066  6570.81690     0.00015      
   2290    21.87934  6320.29844  6521.74460     0.00015      
   2291    21.88802  6078.50920  6262.29300     0.00016      
   2292    21.89670  5747.52805  5876.26510     0.00017      
   2293    21.90539  5406.64803  5455.50290     0.00018      
   2294    21.91407  5114.98719  5092.90920     0.00020      
   2295    21.92276  4905.52256  4832.63820     0.00021      
   2296    21.93144  4781.75175  4686.17870     0.00021      
   2297    21.94012  4722.17002  4621.07180     0.00022      
   2298    21.94881  4690.32998  4596.23970     0.00022      
   2299    21.95749  4647.24741  4568.86770     0.00022      
   2300    21.96618  4565.66939  4512.61870     0.00022      
   2301    21.97486  4443.14277  4426.33150     0.00023      
   2302    21.98354  4298.47770  4318.73000     0.00023      
   2303    21.99223  4153.66540  4204.49320     0.00024      
   2304    22.00091  4023.16781  4099.93550     0.00024      
   2305    22.00960  3914.30635  4014.17550     0.00025      
   2306    22.01828  3830.39238  3955.92940     0.00025      
   2307    22.02696  3771.66385  3921.28590     0.00026      
   2308    22.03565  3735.48373  3904.77320     0.00026      
   2309    22.04433  3717.33326  3896.23120     0.00026      
   2310    22.05301  3712.10065  3895.44560     0.00026      
   2311    22.06170  3715.44580  3901.71070     0.00026      
   2312    22.07038  3724.42752  3914.87550     0.00026      
   2313    22.07907  3736.66075  3929.85890     0.00025      
   2314    22.08775  3749.94229  3944.93120     0.00025      
   2315    22.09644  3764.28444  3952.85230     0.00025      
   2316    22.10512  3784.23839  3956.83910     0.00025      
   2317    22.11380  3817.40062  3961.85230     0.00025      
   2318    22.12249  3870.14414  3975.40140     0.00025      
   2319    22.13117  3943.87703  4007.02050     0.00025      
   2320    22.13986  4032.60343  4054.60130     0.00025      
   2321    22.14854  4121.32932  4112.44140     0.00024      
   2322    22.15722  4187.20883  4159.93360     0.00024      
   2323    22.16591  4208.10778  4184.21040     0.00024      
   2324    22.17459  4176.58634  4177.72950     0.00024      
   2325    22.18327  4104.34303  4136.49950     0.00024      
   2326    22.19196  4013.51629  4072.63790     0.00025      
   2327    22.20064  3926.35694  4005.62080     0.00025      
   2328    22.20933  3860.00338  3953.94800     0.00025      
   2329    22.21801  3824.81087  3926.52880     0.00025      
   2330    22.22670  3824.27450  3923.95530     0.00025      
   2331    22.23538  3855.47066  3944.77710     0.00025      
   2332    22.24406  3909.96931  3983.88920     0.00025      
   2333    22.25275  3975.20339  4030.26320     0.00025      
   2334    22.26143  4035.00268  4067.11960     0.00025      
   2335    22.27012  4070.12839  4080.07230     0.00025      
   2336    22.27880  4065.78027  4068.50710     0.00025      
   2337    22.28748  4024.20349  4031.42770     0.00025      
   2338    22.29617  3964.82678  3985.23850     0.00025      
   2339    22.30485  3911.41676  3940.63060     0.00025      
   2340    22.31354  3883.19909  3913.14890     0.00026      
   2341    22.32222  3892.64390  3915.29740     0.00026      
   2342    22.33090  3944.94936  3963.14110     0.00025      
   2343    22.33959  4037.33171  4058.47360     0.00025      
   2344    22.34827  4158.35047  4187.09130     0.00024      
   2345    22.35695  4287.47168  4325.04790     0.00023      
   2346    22.36564  4396.59545  4435.72410     0.00023      
   2347    22.37432  4460.39033  4506.65330     0.00022      
   2348    22.38301  4472.17352  4535.46440     0.00022      
   2349    22.39169  4446.88921  4541.33450     0.00022      
   2350    22.40038  4406.77648  4540.27730     0.00022      
   2351    22.40906  4366.00932  4541.33790     0.00022      
   2352    22.41774  4324.73746  4535.64310     0.00022      
   2353    22.42643  4274.66298  4509.04000     0.00022      
   2354    22.43511  4213.18506  4442.03810     0.00023      
   2355    22.44380  4150.73449  4344.42480     0.00023      
   2356    22.45248  4103.03378  4232.53320     0.00024      
   2357    22.46116  4081.98505  4134.08250     0.00024      
   2358    22.46985  4093.16369  4073.59720     0.00025      
   2359    22.47853  4135.72405  4066.16240     0.00025      
   2360    22.48721  4202.14264  4108.98930     0.00024      
   2361    22.49590  4277.87966  4180.84720     0.00024      
   2362    22.50458  4342.58470  4253.19430     0.00024      
   2363    22.51327  4374.89788  4293.85110     0.00023      
   2364    22.52195  4361.32696  4286.49170     0.00023      
   2365    22.53064  4303.61497  4229.73100     0.00024      
   2366    22.53932  4216.01849  4128.53370     0.00024      
   2367    22.54800  4115.92177  4013.97000     0.00025      
   2368    22.55669  4017.30117  3902.04540     0.00026      
   2369    22.56537  3928.75826  3813.11670     0.00026      
   2370    22.57406  3854.29415  3748.03270     0.00027      
   2371    22.58274  3793.92090  3704.70970     0.00027      
   2372    22.59142  3744.44701  3681.45800     0.00027      
   2373    22.60011  3701.23970  3664.63750     0.00027      
   2374    22.60879  3661.32185  3657.69560     0.00027      
   2375    22.61748  3625.02523  3651.39060     0.00027      
   2376    22.62616  3594.38356  3649.10250     0.00027      
   2377    22.63484  3570.95955  3648.60350     0.00027      
   2378    22.64353  3555.06251  3646.80440     0.00027      
   2379    22.65221  3545.77226  3649.45850     0.00027      
   2380    22.66089  3541.25935  3645.94510     0.00027      
   2381    22.66958  3539.48726  3643.08250     0.00027      
   2382    22.67826  3539.61003  3640.04250     0.00027      
   2383    22.68695  3542.97703  3643.78420     0.00027      
   2384    22.69563  3552.54484  3654.62520     0.00027      
   2385    22.70432  3571.38913  3666.02610     0.00027      
   2386    22.71300  3601.51840  3692.85690     0.00027      
   2387    22.72168  3643.11297  3732.77370     0.00027      
   2388    22.73037  3693.92131  3786.16700     0.00026      
   2389    22.73905  3748.93063  3841.68750     0.00026      
   2390    22.74774  3801.45092  3891.22490     0.00026      
   2391    22.75642  3847.23418  3939.20340     0.00025      
   2392    22.76510  3888.09168  3974.88060     0.00025      
   2393    22.77379  3929.49728  4014.66800     0.00025      
   2394    22.78247  3974.78996  4053.68750     0.00025      
   2395    22.79116  4021.47649  4097.46730     0.00024      
   2396    22.79984  4061.81911  4142.24460     0.00024      
   2397    22.80852  4085.78416  4173.59280     0.00024      
   2398    22.81721  4082.64787  4188.36960     0.00024      
   2399    22.82589  4046.01387  4162.97020     0.00024      
   2400    22.83458  3981.14383  4108.82620     0.00024      
   2401    22.84326  3902.89477  4031.57470     0.00025      
   2402    22.85194  3828.42303  3947.98170     0.00025      
   2403    22.86063  3773.69000  3879.15580     0.00026      
   2404    22.86931  3752.13529  3830.40550     0.00026      
   2405    22.87799  3773.85844  3823.44970     0.00026      
   2406    22.88668  3845.00873  3854.81880     0.00026      
   2407    22.89536  3966.58080  3931.71170     0.00025      
   2408    22.90405  4132.34363  4054.34330     0.00025      
   2409    22.91273  4326.01101  4198.38130     0.00024      
   2410    22.92142  4518.15435  4338.86330     0.00023      
   2411    22.93010  4667.82363  4438.21880     0.00023      
   2412    22.93878  4738.54669  4475.60350     0.00022      
   2413    22.94747  4719.93571  4445.99020     0.00022      
   2414    22.95615  4625.18612  4353.42920     0.00023      
   2415    22.96484  4473.73212  4223.52830     0.00024      
   2416    22.97352  4289.06703  4073.38110     0.00025      
   2417    22.98220  4099.15797  3945.02390     0.00025      
   2418    22.99089  3928.08065  3840.93410     0.00026      
   2419    22.99957  3789.55483  3772.20120     0.00027      
   2420    23.00825  3687.90725  3733.56350     0.00027      
   2421    23.01694  3621.01637  3714.97750     0.00027      
   2422    23.02562  3583.31334  3720.27000     0.00027      
   2423    23.03431  3567.91302  3735.41500     0.00027      
   2424    23.04299  3567.76217  3755.02470     0.00027      
   2425    23.05168  3576.08849  3771.76610     0.00027      
   2426    23.06036  3587.34379  3780.87300     0.00026      
   2427    23.06904  3599.21855  3786.27080     0.00026      
   2428    23.07773  3613.23697  3786.19600     0.00026      
   2429    23.08641  3632.38743  3789.26540     0.00026      
   2430    23.09510  3658.64289  3798.26930     0.00026      
   2431    23.10378  3692.56740  3809.93190     0.00026      
   2432    23.11246  3735.56133  3828.86770     0.00026      
   2433    23.12115  3793.31620  3855.58980     0.00026      
   2434    23.12983  3875.52680  3894.41500     0.00026      
   2435    23.13852  3990.51390  3948.66190     0.00025      
   2436    23.14720  4139.37956  4013.65600     0.00025      
   2437    23.15588  4312.31695  4087.79320     0.00024      
   2438    23.16457  4489.00780  4160.33640     0.00024      
   2439    23.17325  4643.01564  4217.71530     0.00024      
   2440    23.18193  4744.65417  4250.25200     0.00024      
   2441    23.19062  4765.41073  4251.73290     0.00024      
   2442    23.19930  4695.37192  4221.18550     0.00024      
   2443    23.20799  4555.73089  4157.98050     0.00024      
   2444    23.21667  4384.36820  4084.97360     0.00024      
   2445    23.22536  4215.21721  3995.42580     0.00025      
   2446    23.23404  4071.41095  3921.80740     0.00025      
   2447    23.24272  3965.28013  3866.67600     0.00026      
   2448    23.25141  3899.59914  3829.00320     0.00026      
   2449    23.26009  3871.16948  3810.88330     0.00026      
   2450    23.26878  3874.49767  3805.59350     0.00026      
   2451    23.27746  3903.19811  3816.87650     0.00026      
   2452    23.28614  3951.51346  3844.07320     0.00026      
   2453    23.29483  4017.70686  3886.07080     0.00026      
   2454    23.30351  4104.60345  3949.64180     0.00025      
   2455    23.31219  4214.49238  4028.37450     0.00025      
   2456    23.32088  4343.21883  4115.09420     0.00024      
   2457    23.32956  4479.30975  4210.59230     0.00024      
   2458    23.33825  4610.52261  4302.88230     0.00023      
   2459    23.34693  4734.04909  4411.03960     0.00023      
   2460    23.35562  4859.43881  4552.16850     0.00022      
   2461    23.36430  4999.61564  4735.49560     0.00021      
   2462    23.37298  5156.14181  4961.20900     0.00020      
   2463    23.38167  5307.17566  5168.37300     0.00019      
   2464    23.39035  5406.19724  5306.91210     0.00019      
   2465    23.39904  5403.25274  5321.49270     0.00019      
   2466    23.40772  5281.72669  5206.11080     0.00019      
   2467    23.41640  5069.78725  4964.77880     0.00020      
   2468    23.42509  4816.86604  4682.34670     0.00021      
   2469    23.43377  4568.06434  4387.35110     0.00023      
   2470    23.44245  4352.00782  4145.19040     0.00024      
   2471    23.45114  4180.82225  3985.81860     0.00025      
   2472    23.45982  4055.52904  3887.19560     0.00026      
   2473    23.46851  3969.95472  3838.93240     0.00026      
   2474    23.47719  3912.96509  3816.78270     0.00026      
   2475    23.48588  3872.63619  3806.29760     0.00026      
   2476    23.49456  3842.36489  3803.12520     0.00026      
   2477    23.50324  3823.85408  3801.66210     0.00026      
   2478    23.51193  3823.32897  3814.75290     0.00026      
   2479    23.52061  3845.45891  3835.81840     0.00026      
   2480    23.52930  3889.74822  3871.42820     0.00026      
   2481    23.53798  3949.47839  3914.09450     0.00026      
   2482    23.54666  4011.11871  3957.00240     0.00025      
   2483    23.55535  4055.50182  3984.66380     0.00025      
   2484    23.56403  4065.15458  3984.22220     0.00025      
   2485    23.57272  4035.95815  3959.97580     0.00025      
   2486    23.58140  3979.53247  3917.10500     0.00026      
   2487    23.59008  3912.84350  3864.83910     0.00026      
   2488    23.59877  3849.68414  3824.79860     0.00026      
   2489    23.60745  3800.28392  3803.89650     0.00026      
   2490    23.61614  3772.25405  3822.32710     0.00026      
   2491    23.62482  3768.25598  3873.58060     0.00026      
   2492    23.63350  3783.73293  3944.17160     0.00025      
   2493    23.64219  3806.78706  4007.50660     0.00025      
   2494    23.65087  3820.95630  4043.14870     0.00025      
   2495    23.65956  3813.07362  4036.09940     0.00025      
   2496    23.66824  3781.27934  3983.93680     0.00025      
   2497    23.67692  3733.36143  3899.82350     0.00026      
   2498    23.68561  3680.04236  3820.11690     0.00026      
   2499    23.69429  3631.51383  3744.88620     0.00027      
   2500    23.70297  3595.60180  3707.30180     0.00027      
   2501    23.71166  3576.22804  3699.91210     0.00027      
   2502    23.72034  3572.99001  3716.11300     0.00027      
   2503    23.72903  3581.81446  3743.68140     0.00027      
   2504    23.73771  3597.26277  3773.48390     0.00027      
   2505    23.74640  3615.97456  3802.44970     0.00026      
   2506    23.75508  3637.55609  3828.26950     0.00026      
   2507    23.76376  3662.13608  3843.61650     0.00026      
   2508    23.77245  3689.40062  3848.84180     0.00026      
   2509    23.78113  3720.41989  3848.25000     0.00026      
   2510    23.78982  3758.50427  3850.72880     0.00026      
   2511    23.79850  3807.64937  3873.70000     0.00026      
   2512    23.80718  3872.21699  3918.01610     0.00026      
   2513    23.81587  3956.77427  3990.47070     0.00025      
   2514    23.82455  4061.52870  4089.92290     0.00024      
   2515    23.83323  4176.26712  4186.82370     0.00024      
   2516    23.84192  4278.23529  4269.43550     0.00023      
   2517    23.85060  4338.71056  4304.20360     0.00023      
   2518    23.85929  4339.40562  4287.95650     0.00023      
   2519    23.86797  4282.69361  4213.98730     0.00024      
   2520    23.87666  4185.83818  4115.75490     0.00024      
   2521    23.88534  4071.47855  4004.84330     0.00025      
   2522    23.89402  3958.86468  3905.07890     0.00026      
   2523    23.90271  3858.18923  3826.55570     0.00026      
   2524    23.91139  3771.77046  3755.39870     0.00027      
   2525    23.92007  3699.57035  3703.36690     0.00027      
   2526    23.92876  3643.54976  3655.34380     0.00027      
   2527    23.93744  3607.05888  3617.19020     0.00028      
   2528    23.94613  3591.99273  3597.43530     0.00028      
   2529    23.95481  3597.19203  3590.35640     0.00028      
   2530    23.96350  3617.90816  3596.42680     0.00028      
   2531    23.97218  3645.31666  3612.78050     0.00028      
   2532    23.98086  3666.55603  3625.91700     0.00028      
   2533    23.98955  3668.25442  3626.42970     0.00028      
   2534    23.99823  3644.82234  3611.10740     0.00028      
   2535    24.00692  3602.64031  3588.60500     0.00028      
   2536    24.01560  3553.72370  3560.64400     0.00028      
   2537    24.02428  3507.95816  3529.59200     0.00028      
   2538    24.03297  3470.65943  3508.75850     0.00029      
   2539    24.04165  3443.02168  3492.75020     0.00029      
   2540    24.05034  3423.55104  3483.25220     0.00029      
   2541    24.05902  3410.75923  3481.51370     0.00029      
   2542    24.06770  3405.12435  3477.27490     0.00029      
   2543    24.07639  3408.52910  3480.44260     0.00029      
   2544    24.08507  3422.66878  3485.39990     0.00029      
   2545    24.09376  3448.06356  3494.03520     0.00029      
   2546    24.10244  3483.51823  3511.53390     0.00028      
   2547    24.11112  3525.65916  3533.40430     0.00028      
   2548    24.11981  3568.90381  3561.60330     0.00028      
   2549    24.12849  3606.69733  3586.68650     0.00028      
   2550    24.13717  3632.97392  3599.89500     0.00028      
   2551    24.14586  3643.09187  3603.20970     0.00028      
   2552    24.15454  3636.30003  3590.48410     0.00028      
   2553    24.16323  3617.75576  3575.98540     0.00028      
   2554    24.17191  3595.98753  3557.23660     0.00028      
   2555    24.18060  3578.57183  3537.38010     0.00028      
   2556    24.18928  3570.42156  3527.32320     0.00028      
   2557    24.19796  3574.85550  3527.04080     0.00028      
   2558    24.20665  3594.64753  3541.44820     0.00028      
   2559    24.21533  3631.47281  3566.18090     0.00028      
   2560    24.22401  3684.92150  3602.12520     0.00028      
   2561    24.23270  3751.86568  3658.85670     0.00027      
   2562    24.24138  3826.13001  3717.71530     0.00027      
   2563    24.25007  3900.03063  3796.94310     0.00026      
   2564    24.25875  3968.08373  3881.82030     0.00026      
   2565    24.26743  4028.22084  3982.58590     0.00025      
   2566    24.27612  4078.22051  4088.41530     0.00024      
   2567    24.28480  4112.80864  4168.37990     0.00024      
   2568    24.29349  4125.32910  4219.06540     0.00024      
   2569    24.30217  4111.89543  4221.64060     0.00024      
   2570    24.31086  4073.39738  4180.98880     0.00024      
   2571    24.31954  4015.05738  4106.85060     0.00024      
   2572    24.32822  3945.49362  4018.97460     0.00025      
   2573    24.33691  3873.80600  3930.98390     0.00025      
   2574    24.34559  3806.10624  3849.72580     0.00026      
   2575    24.35428  3744.63408  3783.25020     0.00026      
   2576    24.36296  3690.27299  3726.82420     0.00027      
   2577    24.37164  3644.91894  3679.44680     0.00027      
   2578    24.38033  3610.23296  3645.43900     0.00027      
   2579    24.38901  3585.22950  3617.67720     0.00028      
   2580    24.39770  3565.54783  3597.72390     0.00028      
   2581    24.40638  3544.59171  3581.69730     0.00028      
   2582    24.41506  3516.67215  3562.15670     0.00028      
   2583    24.42375  3480.78340  3537.95480     0.00028      
   2584    24.43243  3441.00122  3506.36790     0.00029      
   2585    24.44111  3403.18293  3476.49850     0.00029      
   2586    24.44980  3372.07497  3447.97950     0.00029      
   2587    24.45848  3350.34058  3423.67600     0.00029      
   2588    24.46717  3338.57636  3412.60470     0.00029      
   2589    24.47585  3335.52810  3403.62300     0.00029      
   2590    24.48454  3338.29697  3399.74150     0.00029      
   2591    24.49322  3342.63682  3401.15230     0.00029      
   2592    24.50190  3343.95819  3400.40190     0.00029      
   2593    24.51059  3339.60650  3400.61350     0.00029      
   2594    24.51927  3330.56415  3395.73320     0.00029      
   2595    24.52796  3320.13221  3402.51390     0.00029      
   2596    24.53664  3311.71095  3408.56740     0.00029      
   2597    24.54532  3307.85816  3412.57280     0.00029      
   2598    24.55401  3310.15946  3423.08540     0.00029      
   2599    24.56269  3319.38891  3439.88010     0.00029      
   2600    24.57138  3336.03721  3465.39060     0.00029      
   2601    24.58006  3360.80335  3491.57890     0.00029      
   2602    24.58874  3394.28605  3520.38090     0.00028      
   2603    24.59743  3436.10042  3552.55370     0.00028      
   2604    24.60611  3484.25944  3585.74610     0.00028      
   2605    24.61480  3535.67103  3628.05980     0.00028      
   2606    24.62348  3588.76636  3657.93990     0.00027      
   2607    24.63216  3645.58607  3692.45830     0.00027      
   2608    24.64085  3709.04242  3738.86600     0.00027      
   2609    24.64953  3778.59607  3802.61210     0.00026      
   2610    24.65821  3850.29628  3896.41330     0.00026      
   2611    24.66690  3919.33501  3999.27950     0.00025      
   2612    24.67558  3978.44929  4089.89040     0.00024      
   2613    24.68427  4015.01280  4136.98050     0.00024      
   2614    24.69295  4017.07883  4129.72950     0.00024      
   2615    24.70164  3987.68746  4075.28390     0.00025      
   2616    24.71032  3948.63892  3988.98630     0.00025      
   2617    24.71900  3927.00708  3909.09520     0.00026      
   2618    24.72769  3941.74295  3855.03560     0.00026      
   2619    24.73637  3998.68899  3858.31180     0.00026      
   2620    24.74505  4089.24583  3916.56080     0.00026      
   2621    24.75374  4189.67065  4001.55660     0.00025      
   2622    24.76242  4262.63973  4072.55440     0.00025      
   2623    24.77111  4269.88350  4090.10790     0.00024      
   2624    24.77979  4196.80753  4049.48340     0.00025      
   2625    24.78847  4062.56681  3953.75930     0.00025      
   2626    24.79716  3901.63208  3830.16720     0.00026      
   2627    24.80584  3743.68834  3699.31840     0.00027      
   2628    24.81453  3607.62132  3579.69210     0.00028      
   2629    24.82321  3502.66443  3489.93260     0.00029      
   2630    24.83190  3430.67123  3431.41650     0.00029      
   2631    24.84058  3388.88513  3396.63990     0.00029      
   2632    24.84926  3372.47870  3382.63090     0.00030      
   2633    24.85795  3376.39091  3379.53830     0.00030      
   2634    24.86663  3396.46449  3392.57030     0.00029      
   2635    24.87532  3430.16156  3413.47120     0.00029      
   2636    24.88400  3476.41869  3453.59770     0.00029      
   2637    24.89268  3534.30923  3506.22120     0.00029      
   2638    24.90137  3601.53004  3568.07710     0.00028      
   2639    24.91005  3672.66273  3641.56840     0.00027      
   2640    24.91874  3738.15217  3703.74390     0.00027      
   2641    24.92742  3786.42437  3750.50170     0.00027      
   2642    24.93610  3807.23170  3764.36040     0.00027      
   2643    24.94479  3793.94666  3744.78300     0.00027      
   2644    24.95347  3746.94132  3698.57010     0.00027      
   2645    24.96215  3675.00041  3637.12300     0.00027      
   2646    24.97084  3590.94888  3569.81010     0.00028      
   2647    24.97952  3506.06316  3500.23900     0.00029      
   2648    24.98821  3428.34938  3445.52880     0.00029      
   2649    24.99689  3363.09338  3402.79390     0.00029      
   2650    25.00558  3312.98277  3377.72800     0.00030      
   2651    25.01426  3278.49172  3359.47310     0.00030      
   2652    25.02294  3258.85384  3350.61840     0.00030      
   2653    25.03163  3252.88769  3354.68580     0.00030      
   2654    25.04031  3259.30310  3372.69600     0.00030      
   2655    25.04900  3276.57749  3401.45040     0.00029      
   2656    25.05768  3302.58041  3452.33640     0.00029      
   2657    25.06636  3334.06898  3510.18430     0.00028      
   2658    25.07505  3366.09176  3567.61790     0.00028      
   2659    25.08373  3392.20706  3609.85790     0.00028      
   2660    25.09241  3407.21540  3632.93770     0.00028      
   2661    25.10110  3411.21664  3644.87500     0.00027      
   2662    25.10978  3409.46561  3641.01100     0.00027      
   2663    25.11847  3407.98973  3624.42040     0.00028      
   2664    25.12715  3410.88106  3596.23270     0.00028      
   2665    25.13584  3420.91398  3573.80640     0.00028      
   2666    25.14452  3440.80595  3549.07080     0.00028      
   2667    25.15320  3472.60008  3531.71360     0.00028      
   2668    25.16189  3516.43330  3524.02000     0.00028      
   2669    25.17057  3570.60793  3528.40260     0.00028      
   2670    25.17926  3631.10471  3546.14380     0.00028      
   2671    25.18794  3690.26796  3552.56910     0.00028      
   2672    25.19662  3738.68504  3551.37180     0.00028      
   2673    25.20531  3772.09703  3547.77660     0.00028      
   2674    25.21399  3795.44395  3556.60790     0.00028      
   2675    25.22267  3816.96051  3569.93770     0.00028      
   2676    25.23136  3839.23955  3584.24950     0.00028      
   2677    25.24004  3854.64107  3598.91430     0.00028      
   2678    25.24873  3847.19342  3601.53910     0.00028      
   2679    25.25741  3803.27713  3587.21580     0.00028      
   2680    25.26609  3724.33601  3553.58030     0.00028      
   2681    25.27478  3625.64869  3504.67600     0.00029      
   2682    25.28346  3524.46851  3450.33860     0.00029      
   2683    25.29215  3432.72383  3392.94750     0.00029      
   2684    25.30083  3356.56138  3356.23320     0.00030      
   2685    25.30952  3298.02811  3328.71360     0.00030      
   2686    25.31820  3256.54608  3304.01070     0.00030      
   2687    25.32688  3230.10354  3279.18900     0.00030      
   2688    25.33557  3216.31941  3260.57710     0.00031      
   2689    25.34425  3213.23388  3253.27320     0.00031      
   2690    25.35294  3219.60671  3251.30860     0.00031      
   2691    25.36162  3234.73371  3264.29980     0.00031      
   2692    25.37030  3257.96620  3279.91870     0.00030      
   2693    25.37899  3288.15352  3304.26030     0.00030      
   2694    25.38767  3323.02130  3339.49930     0.00030      
   2695    25.39636  3358.69027  3371.52470     0.00030      
   2696    25.40504  3390.16412  3400.76860     0.00029      
   2697    25.41372  3413.91460  3415.64770     0.00029      
   2698    25.42241  3430.78393  3429.97290     0.00029      
   2699    25.43109  3444.94844  3445.38960     0.00029      
   2700    25.43978  3460.64703  3459.33570     0.00029      
   2701    25.44846  3480.53355  3473.62280     0.00029      
   2702    25.45714  3504.72217  3477.79570     0.00029      
   2703    25.46583  3530.22800  3491.32570     0.00029      
   2704    25.47451  3552.92385  3507.53540     0.00029      
   2705    25.48319  3571.27690  3525.73320     0.00028      
   2706    25.49188  3586.47096  3547.40940     0.00028      
   2707    25.50056  3598.75127  3574.80570     0.00028      
   2708    25.50925  3605.83017  3598.05370     0.00028      
   2709    25.51793  3605.84846  3592.17140     0.00028      
   2710    25.52662  3601.22902  3575.67600     0.00028      
   2711    25.53530  3598.15115  3555.71440     0.00028      
   2712    25.54398  3602.95545  3551.28300     0.00028      
   2713    25.55267  3619.73382  3566.89060     0.00028      
   2714    25.56135  3649.21092  3610.84160     0.00028      
   2715    25.57004  3687.48908  3685.32620     0.00027      
   2716    25.57872  3724.94669  3746.59960     0.00027      
   2717    25.58740  3747.33059  3784.57130     0.00026      
   2718    25.59609  3741.33388  3781.10840     0.00026      
   2719    25.60477  3702.88746  3739.20970     0.00027      
   2720    25.61345  3639.89774  3664.08810     0.00027      
   2721    25.62214  3566.69353  3571.52830     0.00028      
   2722    25.63082  3496.99336  3484.67920     0.00029      
   2723    25.63951  3440.93926  3420.02780     0.00029      
   2724    25.64819  3405.00356  3378.09500     0.00030      
   2725    25.65688  3392.83191  3351.20260     0.00030      
   2726    25.66556  3405.70162  3333.89970     0.00030      
   2727    25.67424  3442.51012  3340.62430     0.00030      
   2728    25.68293  3499.27283  3362.13940     0.00030      
   2729    25.69161  3568.30034  3400.13040     0.00029      
   2730    25.70029  3637.35806  3447.19120     0.00029      
   2731    25.70898  3690.44130  3499.58250     0.00029      
   2732    25.71766  3711.70876  3545.78300     0.00028      
   2733    25.72635  3692.71143  3557.21310     0.00028      
   2734    25.73503  3637.78884  3541.89770     0.00028      
   2735    25.74372  3561.68352  3500.76030     0.00029      
   2736    25.75240  3481.44171  3460.96040     0.00029      
   2737    25.76108  3410.04342  3413.88600     0.00029      
   2738    25.76977  3354.70820  3377.50220     0.00030      
   2739    25.77845  3317.60422  3359.11990     0.00030      
   2740    25.78713  3297.02750  3359.91330     0.00030      
   2741    25.79582  3288.68573  3370.35030     0.00030      
   2742    25.80450  3287.39408  3370.08500     0.00030      
   2743    25.81319  3289.47904  3364.65670     0.00030      
   2744    25.82187  3294.12103  3351.64920     0.00030      
   2745    25.83056  3302.05735  3335.61570     0.00030      
   2746    25.83924  3313.58250  3340.33110     0.00030      
   2747    25.84792  3328.03234  3342.93820     0.00030      
   2748    25.85661  3344.29094  3349.90700     0.00030      
   2749    25.86529  3360.60147  3342.00710     0.00030      
   2750    25.87398  3373.41986  3338.17800     0.00030      
   2751    25.88266  3377.42508  3322.30620     0.00030      
   2752    25.89134  3368.37949  3321.08060     0.00030      
   2753    25.90003  3346.62959  3333.48120     0.00030      
   2754    25.90871  3317.49597  3318.55930     0.00030      
   2755    25.91739  3288.15384  3304.70340     0.00030      
   2756    25.92608  3264.46771  3290.56760     0.00030      
   2757    25.93476  3249.72818  3296.14430     0.00030      
   2758    25.94345  3244.66837  3316.72880     0.00030      
   2759    25.95213  3248.01358  3333.13750     0.00030      
   2760    25.96082  3257.33187  3344.66060     0.00030      
   2761    25.96950  3269.86151  3338.53960     0.00030      
   2762    25.97818  3282.32786  3366.76320     0.00030      
   2763    25.98687  3290.39671  3380.25810     0.00030      
   2764    25.99555  3289.82865  3397.20000     0.00029      
   2765    26.00423  3279.40682  3418.79570     0.00029
[truncated: 1,310 more chars]
