# Supplementary material for: Mechanochemical Synthesis and Physicochemical Characterization of Previously Unreported Praziquantel Solvates with 2-Pyrrolidone and Acetic Acid
Source: Pharmaceutics. 2021 Oct 2;13(10):1606. doi: 10.3390/pharmaceutics13101606 (PMC8540171; doi:10.3390/pharmaceutics13101606)
Supplement: Supplementary file 1 [file pharmaceutics-13-01606-s001.zip › PZQ-AA-final.cif]

data_PZQ-AA

_publ_section_title
;
Mechanochemical Synthesis and Physicochemical Characterization 
of previously unreported Praziquantel Solvates 
with 2-pyrrolidone and Acetic Acid
;
 
_publ_contact_author_name        'Lara Gigli'
_publ_contact_author_address     
;
Elettra-Sincrotrone Trieste, S.S. 14 Km 163.5 in Area Science Park, 
34149 Basovizza - Trieste, Italy.
;
_publ_contact_author_email       lara.gigli@elettra.eu
_publ_contact_author_phone       '+39 040 375 8732'

loop_
_publ_author_name
_publ_author_address
'Zanolla, Debora'
;
Department of Chemical and Pharmaceutical Sciences, 
University of Trieste, P.le Europa 1, 34127 Trieste, Italy.
;
'Gigli, Lara'
;
Elettra-Sincrotrone Trieste, S.S. 14 Km 163.5 in Area Science Park, 
34149 Basovizza - Trieste, Italy.
;
'Hasa, Dritan'
;
Department of Chemical and Pharmaceutical Sciences, 
University of Trieste, P.le Europa 1, 34127 Trieste, Italy.
;
'Chierotti, R. Michele'
;
Department of Chemistry and NIS Centre, University of Torino, 
V. Giuria 7, 10125 Torino, Italy.
;
'Arhangelskis, Mihails '
;
Faculty of Chemistry, University of Warsaw 1,
 Pasteura Street 02-093 Warsaw, Poland.
;
'Demitri, Nicola'
;
Elettra-Sincrotrone Trieste, S.S. 14 Km 163.5 in Area Science Park, 
34149 Basovizza - Trieste, Italy.
;
'Jones, William'
;
Department of Chemistry, University of Cambridge, 
Lensfield Road CB1 United Kingdom.
;
'Voinovich, Dario'
;
Department of Chemical and Pharmaceutical Sciences, 
University of Trieste, P.le Europa 1, 34127 Trieste, Italy
;
'Perissutti, Beatrice'
;
Department of Chemical and Pharmaceutical Sciences, 
University of Trieste, P.le Europa 1, 34127 Trieste, Italy.
;

_publ_section_abstract
;
The structure of PZQ-AA, C~21~H~28~O~4~N~2~, at 298 K has
triclinic (<i>P</i>-1) symmetry. 
;
_publ_contact_letter 
;
Please consider this CIF for publication. I certify that this contibution is the
original work of those listed as authors; that it has not been published
before (in any language or medium) and is not being considered for publication
elsewhere; that all authors concur with and are aware of the submission; that
all workers involved in the study are listed as authors or given proper credit
in the acknowledgements; that I have obtained permission for and acknowledged
the source of any excerpts from other copyright works; and that to the best of
my knowledge the paper contains no statements which are libellous, unlawful or
in any way actionable. All coauthors have made significant scientific
contributions to the work reported, including the ideas and their execution,
and share responsibility and accountability for the results.
;

_chemical_name_common            'PZQ-AA'
_chemical_formula_moiety         'C19 H24 O2 N2, C2 H4 O2'
_chemical_formula_sum            'C21 H28 N2 O4'
_chemical_formula_weight         372.45

_symmetry_cell_setting           triclinic
_symmetry_space_group_name_H-M   'P-1'
_symmetry_space_group_name_Hall  '-P 1'
_symmetry_Int_Tables_number      2

loop_

_space_group_symop_operation_xyz
' x,y,z'
'-x,-y,-z'


_cell_length_a                    6.0762(2)
_cell_length_b                    11.6197(4)
_cell_length_c                    14.5619(8)
_cell_angle_alpha                 97.292(3)
_cell_angle_beta                  98.851(3)
_cell_angle_gamma                 96.987(2)
_cell_volume                      997.16(7)

_cell_formula_units_Z             2

_pd_spec_mounting                
;
'Boron capillary'
;
_pd_spec_mount_mode              transmission
_pd_spec_shape                   cylinder  
_pd_calibration_special_details  
;
LaB6 standard reference powder (NIST 660a) capillary
;
_pd_char_colour                  'White'
_pd_meas_scan_method             cont
_pd_meas_2theta_range_min        2.00
_pd_meas_2theta_range_max        26.00423

_exptl_crystal_description       'Flat plates'
_cell_measurement_temperature    298(2)
_diffrn_ambient_temperature      298(2)
_diffrn_radiation_wavelength     0.700

_diffrn_radiation_type           Synchrotron
_diffrn_source                   'Elettra Synchrotron - XRD1 BL'
_diffrn_measurement_device_type  
;
'Huber 4-circles Kappa Goniometer, Pilatus 2M detector'
;

_computing_cell_refinement       'TOPAS Academic (Coelho 2018)'
_computing_structure_solution    'EXPO 2014 (Altomare et al. 2014)'
_computing_structure_refinement  'TOPAS Academic (Coelho 2018)'

loop_
_atom_type_symbol
_atom_type_description
_atom_type_scat_dispersion_real
_atom_type_scat_dispersion_imag
_atom_type_scat_source
C C 0.0030 0.0016 'S.Brennan & P.L.Cowan (1992).Rev.Sci.Instr.,63,650'
H H 0.0000 0.0000 'S.Brennan & P.L.Cowan (1992).Rev.Sci.Instr.,63,650'
N N 0.0059 0.0032 'S.Brennan & P.L.Cowan (1992).Rev.Sci.Instr.,63,650'
O O 0.0105 0.0059 'S.Brennan & P.L.Cowan (1992).Rev.Sci.Instr.,63,650'

_exptl_crystal_F_000                                  400
_exptl_absorpt_coefficient_mu                         0.082
_exptl_crystal_density_diffrn                         1.240

_pd_proc_ls_profile_function     pseudo-Voigt
_pd_proc_ls_background_function  'Chebyshev polynomial'

_pd_proc_ls_prof_wR_factor        0.047              
_pd_proc_ls_prof_wR_expected       0.009
_refine_ls_R_Fsqd_factor          0.026

_refine_ls_matrix_type            full    
_refine_ls_weighting_scheme   'calc'                                    
_refine_ls_weighting_details      ?       
_refine_ls_number_restraints      0
_refine_ls_shift/su_max           0.001
_refine_ls_number_constraints     143     

# The following item is the same as CHI, the square root of 'CHI squared'
_refine_ls_goodness_of_fit_all    4.65


loop_
 _atom_site_label
 _atom_site_type_symbol
 _atom_site_fract_x
 _atom_site_fract_y
 _atom_site_fract_z
 _atom_site_U_iso_or_equiv
 _atom_site_adp_type
 _atom_site_occupancy  
 _atom_site_calc_flag
 _atom_site_refinement_flags_posn
 _atom_site_refinement_flags_adp
 _atom_site_refinement_flags_occupancy
 _atom_site_disorder_assembly
 _atom_site_disorder_group
C20 C 0.48817(2) 0.49149(2) 0.22732(2) 0.020(2) Uiso 1  . . . . . .
O3 O 0.67109(2) 0.46212(2) 0.21171(2) 0.020(2) Uiso 1  . . . . . .
O4 O 0.39500(2) 0.46298(2) 0.29332(2) 0.020(2) Uiso 1  . . . . . .
C21 C 0.37121(3) 0.56688(2) 0.16182(2) 0.020(2) Uiso 1  . . . . . .
H25 H 0.232616 0.508859 0.108127 0.040(1) Uiso 1  . . . . . .
H26 H 0.294487 0.635664 0.204721 0.040(1) Uiso 1  . . . . . .
H27 H 0.499272 0.612388 0.123718 0.040(1) Uiso 1  . . . . . .
H28 H 0.492944 0.427293 0.338019 0.040(1) Uiso 1  . . . . . .
N1 N 0.98245(2) 0.17449(2) 0.30939(2) 0.020(2) Uiso 1  . . . . . .
N2 N 0.95513(2) 0.30729(2) 0.47749(2) 0.020(2) Uiso 1  . . . . . .
O1 O 0.64087(2) 0.37104(2) 0.41090(2) 0.020(2)  Uiso 1  . . . . . .
O2 O 1.26795(2) 0.12194(2) 0.24137(2) 0.020(2) Uiso 1  . . . . . .
C1 C 0.78182(2) 0.22957(2) 0.31449(2) 0.020(2) Uiso 1  . . . . . .
H1 H 0.759580 0.275068 0.263194 0.040(1)  Uiso 1  . . . . . .
H2 H 0.652741 0.168850 0.305902 0.040(1) Uiso 1  . . . . . .
C2 C 0.79151(2) 0.30837(2) 0.40559(2) 0.020(2) Uiso 1  . . . . . .
C3 C 1.13597(2) 0.23391(2) 0.47368(2) 0.020(2) Uiso 1  . . . . . .
H3 H 1.266743 0.281526 0.458775 0.040(1) Uiso 1  . . . . . .
C4 C 1.06140(2) 0.13091(2) 0.39578(2) 0.020(2) Uiso 1  . . . . . .
H4 H 0.941528 0.077996 0.411693 0.040(1) Uiso 1  . . . . . .
H5 H 1.186325 0.088128 0.387878 0.040(1) Uiso 1  . . . . . .
C5 C 0.96753(2) 0.38448(2) 0.56638(2) 0.020(2) Uiso 1  . . . . . .
H6 H 1.111703 0.434900 0.581783 0.040(1) Uiso 1  . . . . . .
H7 H 0.849489 0.433670 0.560688 0.040(1) Uiso 1  . . . . . .
C6 C 0.94029(2) 0.31058(2) 0.64259(2) 0.020(2) Uiso 1  . . . . . .
H8 H 0.960678 0.360685 0.702693 0.040(1) Uiso 1  . . . . . .
H9 H 0.789403 0.267164 0.630693 0.040(1) Uiso 1  . . . . . .
C7 C 1.10993(2) 0.22621(2) 0.64628(2) 0.020(2) Uiso 1  . . . . . .
C8 C 1.20653(2) 0.19373(2) 0.56798(2) 0.020(2) Uiso 1  . . . . . .
C9 C 1.37587(2) 0.12355(2) 0.57578(2) 0.020(2) Uiso 1  . . . . . .
H10 H 1.442169 0.102759 0.523975 0.040(1) Uiso 1  . . . . . .
C10 C 1.44522(3) 0.08436(2) 0.65937(2) 0.020(2) Uiso 1  . . . . . .
H11 H 1.560246 0.038475 0.664170 0.040(1) Uiso 1  . . . . . .
C11 C 1.34523(3) 0.11284(2) 0.73578(2) 0.020(2) Uiso 1  . . . . . .
H12 H 1.388261 0.084549 0.791675 0.040(1) Uiso 1  . . . . . .
C12 C 1.18019(3) 0.18312(2) 0.72908(2) 0.020(2) Uiso 1  . . . . . .
H13 H 1.113192 0.202608 0.781184 0.040(1) Uiso 1  . . . . . .
C13 C 1.09304(2) 0.16541(2) 0.23568(2) 0.020(2) Uiso 1  . . . . . .
C14 C 0.99608(2) 0.20861(2) 0.14658(2) 0.020(2) Uiso 1  . . . . . .
H14 H 0.960138 0.287592 0.163681 0.040(1) Uiso 1  . . . . . .
C15 C 0.78159(3) 0.13107(2) 0.09729(2) 0.020(2) Uiso 1  . . . . . .
H15 H 0.811934 0.051283 0.083193 0.040(1) Uiso 1  . . . . . .
H16 H 0.670908 0.131062 0.138800 0.040(1)  Uiso 1  . . . . . .
C16 C 0.68665(3) 0.17356(2) 0.00659(2) 0.020(2) Uiso 1  . . . . . .
H17 H 0.640105 0.249749 0.021494 0.040(1) Uiso 1  . . . . . .
H18 H 0.554760 0.119447 -0.025199 0.040(1) Uiso 1  . . . . . .
C17 C 0.85842(3) 0.18288(2) -0.05842(2) 0.020(2) Uiso 1  . . . . . .
H19 H 0.796386 0.214475 -0.113719 0.040(1) Uiso 1  . . . . . .
H20 H 0.894158 0.105497 -0.078616 0.040(1) Uiso 1  . . . . . .
C18 C 1.06850(3) 0.26121(2) -0.00822(2) 0.020(2) Uiso 1  . . . . . .
H21 H 1.178987 0.265227 -0.049735 0.040(1) Uiso 1  . . . . . .
H22 H 1.033962 0.339807 0.008170 0.040(1) Uiso 1  . . . . . .
C19 C 1.16635(3) 0.21593(2) 0.08047(2) 0.020(2) Uiso 1  . . . . . .
H23 H 1.301236 0.268041 0.111763 0.040(1) Uiso 1  . . . . . .
H24 H 1.207689 0.138931 0.063870 0.040(1) Uiso 1  . . . . . .


# 10. MOLECULAR GEOMETRY

_geom_special_details            
;
 Bond distances, angles etc. have been calculated using the
 rounded fractional coordinates. All su's are estimated
 from the variances of the (full) variance-covariance matrix.
 The cell esds are taken into account in the estimation of
 distances, angles and torsion angles
;

loop_
_geom_bond_atom_site_label_1
_geom_bond_atom_site_label_2
_geom_bond_distance
_geom_bond_site_symmetry_2
_geom_bond_publ_flag
 O1      C2        1.2425(3)                     .       ?                   
 O2      C13       1.2271(2)                     .       ?                   
 N1      C1        1.4515(2)                     .       ?                   
 N1      C4        1.4506(4)                     .       ?                   
 N1      C13       1.3510(3)                     .       ?                   
 N2      C2        1.3307(3)                     .       ?                   
 N2      C3        1.4738(3)                     .       ?                   
 N2      C5        1.4644(4)                     .       ?                   
 C1      C2        1.5021(4)                     .       ?                   
 C3      C4        1.5132(4)                     .       ?                   
 C3      C8        1.5224(4)                     .       ?                   
 O3      C20       1.2465(2)                     .       ?                   
 O4      C20       1.2476(3)                     .       ?                   
 C5      C6        1.5034(4)                     .       ?                   
 C6      C7        1.5062(3)                     .       ?                   
 C7      C12       1.3905(4)                     .       ?                   
 C7      C8        1.3920(4)                     .       ?                   
 C8      C9        1.3886(3)                     .       ?                   
 C9      C10       1.3770(4)                     .       ?                   
 C10     C11       1.3712(4)                     .       ?                   
 C11     C12       1.3680(3)                     .       ?                   
 C13     C14       1.5115(4)                     .       ?                   
 C14     C15       1.5126(3)                     .       ?                   
 C14     C19       1.5200(3)                     .       ?                   
 C15     C16       1.5236(4)                     .       ?                   
 C16     C17       1.5165(3)                     .       ?                   
 C17     C18       1.5012(3)                     .       ?                   
 C18     C19       1.5201(4)                     .       ?                   
 C1      H2           0.9700                     .       ?                   
 C1      H1           0.9700                     .       ?                   
 C3      H3           0.9800                     .       ?                   
 C4      H5           0.9700                     .       ?                   
 O4      H28          0.9800                     .       ?                   
 C4      H4           0.9700                     .       ?                   
 C5      H7           0.9700                     .       ?                   
 C5      H6           0.9700                     .       ?                   
 C6      H9           0.9700                     .       ?                   
 C6      H8           0.9700                     .       ?                   
 C9      H10          0.9300                     .       ?                   
 C10     H11          0.9300                     .       ?                   
 C11     H12          0.9300                     .       ?                   
 C12     H13          0.9300                     .       ?                   
 C14     H14          0.9800                     .       ?                   
 C15     H16          0.9700                     .       ?                   
 C15     H15          0.9700                     .       ?                   
 C16     H17          0.9700                     .       ?                   
 C16     H18          0.9700                     .       ?                   
 C17     H20          0.9700                     .       ?                   
 C17     H19          0.9700                     .       ?                   
 C18     H22          0.9700                     .       ?                   
 C18     H21          0.9700                     .       ?                   
 C19     H24          0.9700                     .       ?                   
 C19     H23          0.9700                     .       ?                   
 C20     C21       1.5288(4)                     .       ?                   
 C21     H25          1.1400                     .       ?                   
 C21     H26          1.1400                     .       ?                   
 C21     H27          1.1400                     .       ?                   

loop_
_geom_angle_atom_site_label_1
_geom_angle_atom_site_label_2
_geom_angle_atom_site_label_3
_geom_angle
_geom_angle_site_symmetry_1
_geom_angle_site_symmetry_2
_geom_angle_site_symmetry_3
_geom_angle_publ_flag
 C1      N1      C4        112.18(2)             .       .       .           yes
 C1      N1      C13       126.09(2)             .       .       .           yes
 C4      N1      C13       121.71(2)             .       .       .           yes
 C2      N2      C3        123.92(2)             .       .       .           yes
 C2      N2      C5        120.30(2)             .       .       .           yes
 C3      N2      C5        115.75(2)             .       .       .           yes
 N1      C1      C2        113.68(2)             .       .       .           yes
 O1      C2      N2        122.51(3)             .       .       .           yes
 O1      C2      C1        117.67(2)             .       .       .           yes
 N2      C2      C1        119.80(2)             .       .       .           yes
 N2      C3      C4        109.79(2)             .       .       .           yes
 N2      C3      C8        111.35(2)             .       .       .           yes
 C4      C3      C8        111.51(2)             .       .       .           no
 N1      C4      C3        108.78(2)             .       .       .           yes
 N2      C5      C6        108.94(2)             .       .       .           yes
 C5      C6      C7        110.37(2)             .       .       .           no
 C6      C7      C8        120.62(2)             .       .       .           no
 C6      C7      C12       120.66(2)             .       .       .           no
 C8      C7      C12       118.67(2)             .       .       .           no
 C3      C8      C7        122.40(2)             .       .       .           no
 C3      C8      C9        118.32(2)             .       .       .           no
 C7      C8      C9        119.28(2)             .       .       .           no
 C8      C9      C10       120.64(2)             .       .       .           no
 C9      C10     C11       120.27(2)             .       .       .           no
 C10     C11     C12       119.48(2)             .       .       .           no
 C7      C12     C11       121.60(2)             .       .       .           no
 O2      C13     N1        120.15(3)             .       .       .           yes
 O2      C13     C14       121.07(2)             .       .       .           yes
 N1      C13     C14       118.78(2)             .       .       .           yes
 C13     C14     C15       111.39(2)             .       .       .           no
 C13     C14     C19       110.91(1)             .       .       .           no
 C15     C14     C19       110.05(2)             .       .       .           no
 C14     C15     C16       111.25(2)             .       .       .           no
 C15     C16     C17       111.64(2)             .       .       .           no
 C16     C17     C18       109.89(2)             .       .       .           no
 C17     C18     C19       111.04(2)             .       .       .           no
 C14     C19     C18       110.49(2)             .       .       .           no
 N1      C1      H1           109.00             .       .       .           no
 N1      C1      H2           109.00             .       .       .           no
 C2      C1      H1           109.00             .       .       .           no
 C2      C1      H2           109.00             .       .       .           no
 H1      C1      H2           108.00             .       .       .           no
 N2      C3      H3           108.00             .       .       .           no
 C4      C3      H3           108.00             .       .       .           no
 C8      C3      H3           108.00             .       .       .           no
 N1      C4      H4           110.00             .       .       .           no
 N1      C4      H5           110.00             .       .       .           no
 C3      C4      H4           110.00             .       .       .           no
 C3      C4      H5           110.00             .       .       .           no
 H4      C4      H5           108.00             .       .       .           no
 C20     O4      H28          113.00             .       .       .           no
 N2      C5      H7           110.00             .       .       .           no
 C6      C5      H6           110.00             .       .       .           no
 N2      C5      H6           110.00             .       .       .           no
 H6      C5      H7           108.00             .       .       .           no
 C6      C5      H7           110.00             .       .       .           no
 C5      C6      H9           110.00             .       .       .           no
 C7      C6      H8           110.00             .       .       .           no
 C5      C6      H8           110.00             .       .       .           no
 H8      C6      H9           108.00             .       .       .           no
 C7      C6      H9           110.00             .       .       .           no
 C8      C9      H10          119.00             .       .       .           no
 C10     C9      H10          120.00             .       .       .           no
 C11     C10     H11          120.00             .       .       .           no
 C9      C10     H11          120.00             .       .       .           no
 C10     C11     H12          121.00             .       .       .           no
 C12     C11     H12          120.00             .       .       .           no
 C7      C12     H13          119.00             .       .       .           no
 C11     C12     H13          119.00             .       .       .           no
 C15     C14     H14          108.00             .       .       .           no
 C19     C14     H14          108.00             .       .       .           no
 C13     C14     H14          108.00             .       .       .           no
 C14     C15     H16          109.00             .       .       .           no
 C16     C15     H15          109.00             .       .       .           no
 C14     C15     H15          109.00             .       .       .           no
 H15     C15     H16          108.00             .       .       .           no
 C16     C15     H16          109.00             .       .       .           no
 C15     C16     H17          109.00             .       .       .           no
 C17     C16     H17          109.00             .       .       .           no
 C17     C16     H18          109.00             .       .       .           no
 H17     C16     H18          108.00             .       .       .           no
 C15     C16     H18          109.00             .       .       .           no
 C16     C17     H20          110.00             .       .       .           no
 C18     C17     H19          110.00             .       .       .           no
 C16     C17     H19          110.00             .       .       .           no
 H19     C17     H20          108.00             .       .       .           no
 C18     C17     H20          110.00             .       .       .           no
 C17     C18     H22          109.00             .       .       .           no
 C19     C18     H21          110.00             .       .       .           no
 C17     C18     H21          109.00             .       .       .           no
 H21     C18     H22          108.00             .       .       .           no
 C19     C18     H22          109.00             .       .       .           no
 C14     C19     H23          110.00             .       .       .           no
 C18     C19     H23          110.00             .       .       .           no
 C18     C19     H24          109.00             .       .       .           no
 H23     C19     H24          108.00             .       .       .           no
 C14     C19     H24          110.00             .       .       .           no
 O3      C20     C21       118.11(2)             .       .       .           yes
 O4      C20     C21       118.08(2)             .       .       .           yes
 O3      C20     O4        123.81(2)             .       .       .           yes
 C20     C21     H25          109.00             .       .       .           no
 C20     C21     H26          109.00             .       .       .           no
 C20     C21     H27          109.00             .       .       .           no
 H25     C21     H26          109.00             .       .       .           no
 H25     C21     H27          109.00             .       .       .           no
 H26     C21     H27          109.00             .       .       .           no


loop_
_geom_torsion_atom_site_label_1
_geom_torsion_atom_site_label_2
_geom_torsion_atom_site_label_3
_geom_torsion_atom_site_label_4
_geom_torsion
_geom_torsion_site_symmetry_1
_geom_torsion_site_symmetry_2
_geom_torsion_site_symmetry_3
_geom_torsion_site_symmetry_4
_geom_torsion_publ_flag
 C4      N1      C1      C2      43.35(3)     .       .       .       .   no
 C13     N1      C1      C2       -134.89(3)     .       .       .       .   no
 C1      N1      C13     O2        176.33(2)     .       .       .       .   no
 C1      N1      C4      C3        -65.08(2)     .       .       .       .   no
 C13     N1      C4      C3        113.24(2)     .       .       .       .   no
 C4      N1      C13     C14       177.70(2)     .       .       .       .   no
 C4      N1      C13     O2         -1.75(4)     .       .       .       .   no
 C1      N1      C13     C14        -4.23(4)     .       .       .       .   no
 C5      N2      C3      C4        159.62(2)     .       .       .       .   no
 C5      N2      C2      C1        179.45(2)     .       .       .       .   no
 C2      N2      C3      C8       -146.16(2)     .       .       .       .   no
 C5      N2      C3      C8         35.63(3)     .       .       .       .   no
 C3      N2      C2      O1        179.86(3)     .       .       .       .   no
 C2      N2      C5      C6        117.60(2)     .       .       .       .   no
 C3      N2      C5      C6        -64.13(2)     .       .       .       .   no
 C3      N2      C2      C1          1.32(3)     .       .       .       .   no
 C5      N2      C2      O1         -2.01(4)     .       .       .       .   no
 C2      N2      C3      C4        -22.18(3)     .       .       .       .   no
 N1      C1      C2      N2        -10.96(3)     .       .       .       .   no
 N1      C1      C2      O1        170.43(2)     .       .       .       .   no
 C8      C3      C4      N1        176.23(1)     .       .       .       .   no
 N2      C3      C8      C7         -1.00(3)     .       .       .       .   no
 N2      C3      C4      N1         52.34(2)     .       .       .       .   no
 C4      C3      C8      C7       -124.01(2)     .       .       .       .   no
 C4      C3      C8      C9         56.95(2)     .       .       .       .   no
 N2      C3      C8      C9        179.96(2)     .       .       .       .   no
 N2      C5      C6      C7         54.50(2)     .       .       .       .   no
 C5      C6      C7      C12       154.42(2)     .       .       .       .   no
 C5      C6      C7      C8        -22.84(3)     .       .       .       .   no
 C6      C7      C8      C9        174.70(2)     .       .       .       .   no
 C12     C7      C8      C3        178.36(2)     .       .       .       .   no
 C12     C7      C8      C9         -2.61(3)     .       .       .       .   no
 C6      C7      C8      C3         -4.33(3)     .       .       .       .   no
 C6      C7      C12     C11      -175.45(2)     .       .       .       .   no
 C8      C7      C12     C11         1.86(3)     .       .       .       .   no
 C3      C8      C9      C10      -179.68(2)     .       .       .       .   no
 C7      C8      C9      C10         1.25(3)     .       .       .       .   no
 C8      C9      C10     C11         0.97(3)     .       .       .       .   no
 C9      C10     C11     C12        -1.76(3)     .       .       .       .   no
 C10     C11     C12     C7          0.33(4)     .       .       .       .   no
 O2      C13     C14     C15       110.00(2)     .       .       .       .   no
 O2      C13     C14     C19       -12.95(3)     .       .       .       .   no
 N1      C13     C14     C15       -69.44(3)     .       .       .       .   no
 N1      C13     C14     C19       167.61(2)     .       .       .       .   no
 C13     C14     C15     C16      -178.96(2)     .       .       .       .   no
 C19     C14     C15     C16       -55.52(2)     .       .       .       .   no
 C13     C14     C19     C18      -179.14(2)     .       .       .       .   no
 C15     C14     C19     C18        57.15(3)     .       .       .       .   no
 C14     C15     C16     C17        55.47(3)     .       .       .       .   no
 C15     C16     C17     C18       -55.89(3)     .       .       .       .   no
 C16     C17     C18     C19        57.63(2)     .       .       .       .   no
 C17     C18     C19     C14       -58.94(3)     .       .       .       .   no


_shelx_hkl_file
;
   0   0   1    1987      45  
   0   1   0     154      12
   0  -1   1    1964      44
   0   1   1     225      15
   0   0   2     284      17
   0  -1   2     664      26
   1   0   0    2660      52
   1   0  -1    1614      40
   0   2   0    6339      80
   0   1   2      45       7
   1  -1   0    1348      37
   0  -2   1     353      19
   1  -1  -1     552      23
   1   0   1      54       7
   1  -1   1     667      26
   1   1  -1    1764      42
   0   2   1       1       1
   1   0  -2    8042      90
   1   1   0     441      21
   0  -2   2     494      22
   0   0   3     971      31
   0  -1   3    1056      33
   1  -1  -2    3870      62
   1   1  -2      14       4
   1  -2   0    2002      45
   1   1   1     510      23
   1  -2  -1    6048      78
   1  -2   1      85       9
   1  -1   2    1525      39
   1   0   2      10       3
   0   1   3     930      31
   0   2   2    8166      90
   1   0  -3      48       7
   0  -2   3    1105      33
   1   2  -1   14996     122
   1   1  -3      14       4
   1   2   0   25703     160
   0  -3   1    1404      37
   0   3   0    9578      98
   1  -1  -3     394      20
   1  -2  -2      50       7
   1  -2   2     554      24
   1   1   2     976      31
   1   2  -2     729      27
   0  -3   2    2257      48
   0   0   4     269      16
   0  -1   4      80       9
   0   3   1    1461      38
   1   2   1      56       8
   1  -1   3     305      17
   1  -3   0       3       2
   1   0   3     308      18
   0   2   3     408      20
   1  -3   1     464      22
   1   2  -3     336      18
   1   0  -4      14       4
   1  -3  -1     533      23
   1  -2  -3    1515      39
   0   1   4      46       7
   0  -2   4     122      11
   1   1  -4    3298      57
   1  -2   3      47       7
   0  -3   3     686      26
   0   3   2    3263      57
   1  -3   2     717      27
   1  -1  -4     384      20
   1   1   3     110      10
   1   2   2   13239     115
   1   3  -1     103      10
   1  -3  -2     352      19
   2   0  -1     152      12
   1   3   0     108      10
   1   3  -2     353      19
   2  -1  -1     589      24
   2  -1   0       4       2
   2   0   0       0       1
   1   2  -4     227      15
   2   0  -2       8       3
   2  -1  -2      22       5
   1  -1   4    1183      34
   0  -4   1      83       9
   0  -1   5      86       9
   0   4   0     314      18
   0   0   5     191      14
   1   0   4     512      23
   2  -1   1     365      19
   0   2   4      20       4
   2   1  -1      36       6
   1   3   1       0       1
   1  -3   3    1070      33
   1   3  -3    1549      39
   0  -3   4     590      24
   2   0   1     928      30
   2  -2   0      11       3
   2  -2  -1     492      22
   1  -2  -4      56       7
   0  -4   2       3       2
   2   1  -2      26       5
   2   1   0    1330      36
   0   3   3      22       5
   1  -2   4     209      14
   1   0  -5     207      14
   2   0  -3    1099      33
   1  -3  -3      15       4
   1   1  -5     395      20
   1  -4   0      14       4
   1   2   3       1       1
   0   4   1    2293      48
   0  -2   5      37       6
   1  -4   1    1737      42
   2  -2   1      59       8
   2  -2  -2     147      12
   2  -1  -3     132      12
   0   1   5     825      29
   1  -4  -1     540      23
   1   1   4      23       5
   2   1  -3      93      10
   1  -1  -5     107      10
   2   1   1     465      22
   2  -1   2     209      14
   0  -4   3    1274      36
   1  -4   2      25       5
   1   3   2    1290      36
   2   0   2      53       7
   1   3  -4     513      23
   1   2  -5     810      28
   2   2  -1      61       8
   2  -2   2     110      10
   2  -3   0       4       2
   2   2  -2    1515      39
   0   4   2       5       2
   2  -2  -3      17       4
   1  -3   4    2357      49
   2  -3  -1     596      24
   2   0  -4     756      27
   1  -4  -2    1062      33
   2   2   0     243      16
   1   4  -1     890      30
   2  -3   1      29       5
   0  -3   5     378      19
   1   4  -2      36       6
   2  -1  -4     197      14
   1  -1   5     330      18
   1   4   0     284      17
   2   1  -4     667      26
   1  -4   3     713      27
   2   1   2     148      12
   1  -3  -4     394      20
   2   2  -3      51       7
   0   3   4    1373      37
   2  -3  -2       0       0
   1  -2  -5     789      28
   1   0   5     134      12
   0   2   5     832      29
   0  -4   4     514      23
   0  -1   6     863      29
   2  -1   3       5       2
   1  -2   5    2398      49
   1   2   4     436      21
   2   2   1      87       9
   0   0   6     719      27
   1   4  -3    1098      33
   1   0  -6      94      10
   2  -3   2     409      20
   2   0   3     361      19
   1   1  -6     255      16
   1   3   3     416      20
   1   4   1     663      26
   2  -2   3    1387      37
   1   3  -5     151      12
   0  -2   6     170      13
   0  -5   1     179      13
   2  -2  -4     153      12
   1  -4  -3     715      27
   0   4   3    1044      32
   0   5   0      17       4
   2   2  -4    1315      36
   1   1   5       4       2
   2  -3  -3     582      24
   0  -5   2     354      19
   2   0  -5     545      23
   1  -1  -6     559      24
   0   1   6      52       7
   1   2  -6       7       3
   1  -5   1      24       5
   2   3  -1      32       6
   1  -5   0     989      31
   1  -4   4      16       4
   2   3  -2      57       8
   1  -3   5      23       5
   1   4  -4     133      12
   2  -4   0    1198      35
   2   1  -5     256      16
   2   1   3     180      13
   2  -1  -5     964      31
   2   2   2     684      26
   0   5   1     151      12
   2  -4  -1     772      28
   2   3   0    1257      35
   2  -4   1     844      29
   1  -5   2      27       5
   0  -5   3     141      12
   1  -5  -1     177      13
   2  -3   3     253      16
   0  -4   5       0       0
   1   4   2    1087      33
   2   3  -3      19       4
   0  -3   6    2864      54
   1  -3  -5      69       8
   2  -1   4     866      29
   0   3   5      43       7
   2  -4  -2     129      11
   1  -1   6    5617      75
   2  -4   2     386      20
   2  -2   4      41       6
   2   0   4      76       9
   2  -3  -4      70       8
   2   2  -5       2       1
   1  -2  -6    4058      64
   1  -4  -4       6       2
   2   3   1     104      10
   1   3   4       5       2
   2  -2  -5     184      14
   1  -5   3     318      18
   1  -5  -2     343      19
   1   2   5     222      15
   0   5   2      68       8
   0   2   6     143      12
   1   0   6      14       4
   1   3  -6     618      25
   1  -2   6     980      31
   0   4   4    1522      39
   2   3  -4    2618      51
   1   5  -1     253      16
   0  -5   4      71       8
   1   4  -5     168      13
   1   5  -2     826      29
   0  -1   7     153      12
   2   2   3       0       1
   1   1  -7       3       2
   1  -4   5     637      25
   1   5   0     522      23
   1   0  -7       5       2
   0   0   7     192      14
   2   0  -6    3947      63
   2  -4  -3       8       3
   3  -1  -1     584      24
   1   5  -3     276      17
   2  -3   4       1       1
   1   4   3     364      19
   0  -2   7     173      13
   2   1  -6     205      14
   3   0  -1      27       5
   2   1   4     661      26
   3  -1  -2      51       7
   2  -4   3     187      14
   3  -1   0      30       5
   3   0  -2     103      10
   2  -1  -6     393      20
   1   1   6       0       0
   1  -3   6    1130      34
   3   0   0     388      20
   2   3   2    1814      43
   1   2  -7       3       2
   3  -2  -1     586      24
   0  -4   6    1401      37
   1  -5   4      49       7
   1  -1  -7     432      21
   1  -5  -3     161      13
   2   4  -2     932      31
   2   4  -1    1034      32
   1   5   1     289      17
   3  -2   0    1117      33
   0   1   7       5       2
   3   0  -3       6       2
   3  -2  -2     301      17
   2  -5   0      12       3
   3  -1  -3    1525      39
   2   3  -5    2149      46
   0   5   3     213      15
   3  -1   1    1252      35
   3   1  -1      51       7
   2  -5   1     383      20
   3   1  -2      13       4
   2  -3  -5       2       2
   2  -1   5     575      24
   1   5  -4     105      10
   2   2  -6     528      23
   2   4  -3     908      30
   2  -5  -1     107      10
   0  -5   5      32       6
   2   4   0    1324      36
   0  -6   1     365      19
   1  -3  -6     333      18
   3   0   1     320      18
   0  -3   7     862      29
   2  -2   5      29       5
   3  -2   1     119      11
   1  -4  -5      58       8
   0  -6   2      25       5
   3   1   0     615      25
   0   6   0     128      11
   2   0   5     533      23
   3   1  -3      11       3
   1  -6   1       2       2
   1   4  -6     679      26
   2  -2  -6      14       4
   2  -4  -4     408      20
   3  -2  -3     109      10
   1  -6   0      84       9
   0   3   6     121      11
   2  -5   2      30       5
   1   3   5    1084      33
   0   4   5     956      31
   3  -3  -1     322      18
   2  -4   4      30       5
   2  -5  -2       0       0
   3   0  -4     203      14
   1   3  -7      15       4
   1  -6   2     219      15
   3  -3   0       2       1
   2   2   4     223      15
   3  -1  -4       0       0
   2   4  -4     124      11
   1   5   2    5067      71
   0  -6   3     312      18
   1  -1   7     114      11
   1  -2  -7     504      22
   3  -1   2     237      15
   2   4   1    2212      47
   1  -6  -1      15       4
   1   2   6     814      29
   3  -3  -2     305      17
   0   6   1     426      21
   1  -4   6    2894      54
   1   4   4     124      11
   2   3   3     333      18
   2  -3   5     460      21
   3   1   1       5       2
   1  -2   7       2       1
   3  -2   2       6       2
   1  -5   5     825      29
   3  -3   1      41       6
   3   1  -4      43       7
   2   0  -7     154      12
   0   2   7       0       0
   1  -5  -4       5       2
   1   0   7      60       8
   1   5  -5       8       3
   3   0   2      93      10
   3   2  -2     158      13
   3   2  -1     275      17
   2   1  -7      72       8
   2   1   5     114      11
   1  -6   3     694      26
   2   3  -6     249      16
   2  -5   3     797      28
   3  -2  -4     413      20
   0   5   4     200      14
   3   2  -3      60       8
   1   1  -8     689      26
   0  -1   8      55       7
   3  -3  -3      41       6
   2  -1  -7       3       2
   2  -5  -3     243      16
   3   2   0      16       4
   1   0  -8      38       6
   0  -6   4     372      19
   1  -6  -2     464      22
   0  -4   7     592      24
   0  -5   6      60       8
   0   0   8       0       1
   2   4  -5     491      22
   1  -3   7      43       7
   3   0  -5     545      23
   0  -2   8     421      21
   0   6   2      99      10
   2  -3  -6     311      18
   3  -3   2     144      12
   1   6  -2      11       3
   2   2  -7       2       1
   1   6  -1      74       9
   2   4   2    2672      52
   3  -1  -5      74       9
   2  -4  -5     419      20
   1   2  -8     427      21
   3   1   2      56       7
   1   1   7      45       7
   3  -1   3      11       3
   1   5   3    1125      34
   3   2  -4     693      26
   3  -4   0    1191      35
   3  -4  -1    3136      56
   2  -1   6     143      12
   3   1  -5      27       5
   1   6  -3      86       9
   1  -1  -8       0       1
   2  -4   5       0       1
   3  -2   3       3       2
   1   6   0     173      13
   1   4  -7      76       9
   1  -6   4     212      15
   1  -4  -6     136      12
   2  -2   6     349      19
   3   2   1       2       2
   2   5  -2       5       2
   2   5  -1     223      15
   3   0   3     102      10
   1  -3  -7     250      16
   3  -4   1      15       4
   3  -4  -2     172      13
   2  -2  -7       3       2
   3  -3  -4      88       9
   2  -5   4     162      13
   0   1   8     309      18
   2  -6   0     941      31
   2   0   6      82       9
   1   5  -6     277      17
   2   5  -3     469      22
   3  -2  -5      73       9
   2  -6   1     368      19
   0  -3   8      13       4
   2   3   4      49       7
   2   2   5      91      10
   0   4   6    1511      39
   1  -6  -3       6       2
   0  -6   5     247      16
   1   3   6       0       0
   2  -5  -4       0       1
   1  -5   6      82       9
   3   3  -2       8       3
   2  -6  -1    1295      36
   2   5   0     137      12
   1  -5  -5      63       8
   1   4   5     544      23
   1   6  -4    1319      36
   3   3  -1      60       8
   0   3   7     413      20
   1   3  -8      44       7
   1   6   1     214      15
   3  -3   3      25       5
   2  -3   6     289      17
   2  -6   2      70       8
   1  -4   7      90       9
   3   3  -3      47       7
   0   6   3     108      10
   2   3  -7       0       0
   3   2  -5     431      21
   2   4  -6       0       0
   3  -4   2     334      18
   3  -4  -3     749      27
   2   5  -4     123      11
   3   0  -6      58       8
   2   4   3      27       5
   0   5   5     374      19
   3   1   3     335      18
   3   3   0      86       9
   3   2   2     216      15
   1  -2  -8     424      21
   1   2   7      56       7
   2   0  -8      95      10
   2  -6  -2     249      16
   3  -1  -6      91      10
   2   1  -8      22       5
   1  -1   8     112      11
   2   1   6     988      31
   1  -6   5     432      21
   3   1  -6       5       2
   0  -7   1     364      19
   1  -2   8     213      15
   0  -5   7    1128      34
   2   5   1     140      12
   3  -1   4      56       7
   3   3  -4      77       9
   0  -7   2      27       5
   1  -7   1    1034      32
   3  -2   4      95      10
   1   5   4     521      23
   2  -6   3       3       2
   2  -4  -6     109      10
   1  -7   0     205      14
   3  -3  -5     827      29
   0   2   8       4       2
   0   7   0       4       2
   1   0   8     218      15
   1  -7   2      61       8
   2  -1  -8      25       5
   1   6  -5     687      26
   2  -3  -7      79       9
   1   6   2     966      31
   0  -4   8     197      14
   2  -5   5     122      11
   2   2  -8      20       4
   0  -7   3     306      17
   3   0   4       2       1
   3  -5   0      65       8
   2   5  -5     244      16
   3   3   1      15       4
   2  -4   6      17       4
   3  -5  -1       0       0
   3  -4   3     172      13
   1  -6  -4     350      19
   3  -4  -4      52       7
   3  -2  -6     232      15
   1   1  -9      62       8
   0  -6   6     457      21
   1  -7  -1      15       4
   1  -3   8     308      18
   1   5  -7      22       5
   0  -1   9      69       8
   3  -5   1      83       9
   2  -5  -5     257      16
   1   0  -9     189      14
   3  -3   4      20       4
   2  -6  -3     139      12
   1   4  -8     113      11
   1  -7   3     526      23
   3   2  -6     497      22
   0   7   1      78       9
   3  -5  -2      25       5
   3   3  -5      20       4
   0  -2   9     103      10
   1   2  -9     265      16
   2  -1   7       6       2
   1  -4  -7      67       8
   2   3   5       0       0
   0   6   4      40       6
   0   0   9     184      14
   2  -2   7       3       2
   2   5   2    1169      34
   3   2   3      44       7
   1   1   8       0       1
   2   4  -7       1       1
   0  -7   4      35       6
   1  -5   7      71       8
   2  -6   4       1       1
   2  -2  -8     568      24
   1  -5  -6       4       2
   3  -5   2      20       4
   3   4  -2     112      11
   2   2   6     633      25
   3   1   4      75       9
   2   4   4     251      16
   3   0  -7     662      26
   1  -1  -9      45       7
   1  -3  -8       7       3
   2   0   7     121      11
   1  -7  -2     337      18
   3   4  -1      20       4
   1   4   6     107      10
   3   4  -3      91      10
   2   3  -8     631      25
 ;  
loop_
_pd_proc_point_id
_pd_meas_2theta_scan
_pd_proc_intensity_total
_pd_calc_intensity_total
_pd_proc_ls_weight

      1     2.00166  7924.23676  8215.37990     0.00012   
      2     2.01035  7920.85349  8197.79980     0.00012         
      3     2.01903  7917.50213  8182.70210     0.00012         
      4     2.02771  7914.18390  8183.21190     0.00012         
      5     2.03640  7910.89975  8146.06880     0.00012         
      6     2.04508  7907.65070  8154.40670     0.00012         
      7     2.05377  7904.43816  8150.56540     0.00012         
      8     2.06245  7901.26326  8129.54740     0.00012         
      9     2.07113  7898.12723  8129.61280     0.00012         
     10     2.07982  7895.03169  8139.70260     0.00012         
     11     2.08850  7891.97802  8111.28520     0.00012         
     12     2.09719  7888.96770  8119.18410     0.00012         
     13     2.10587  7886.00260  8101.42380     0.00012         
     14     2.11455  7883.08441  8092.67970     0.00012         
     15     2.12324  7880.21495  8088.37550     0.00012         
     16     2.13192  7877.39831  8087.69430     0.00012         
     17     2.14061  7874.63489  8067.86820     0.00012         
     18     2.14929  7871.92440  8077.12450     0.00012         
     19     2.15797  7869.27187  8051.84280     0.00012         
     20     2.16666  7866.68073  8053.98730     0.00012         
     21     2.17534  7864.15110  8048.33690     0.00012         
     22     2.18403  7861.68744  8027.29540     0.00012         
     23     2.19271  7859.29290  8021.40630     0.00012         
     24     2.20139  7856.97113  8031.77290     0.00012         
     25     2.21008  7854.72518  7997.94380     0.00013         
     26     2.21876  7852.55919  8008.11720     0.00012         
     27     2.22745  7850.47728  8007.62600     0.00012         
     28     2.23613  7848.48402  7992.71140     0.00013         
     29     2.24481  7846.60732  7989.34810     0.00013         
     30     2.25350  7844.83282  7990.02930     0.00013         
     31     2.26218  7843.13599  7967.76900     0.00013         
     32     2.27087  7841.67444  7982.55420     0.00013         
     33     2.27955  7840.21000  7967.75930     0.00013         
     34     2.28823  7838.86445  7965.73440     0.00013         
     35     2.29692  7837.65039  7957.78220     0.00013         
     36     2.30560  7836.57610  7943.40040     0.00013         
     37     2.31429  7835.65061  7935.15280     0.00013         
     38     2.32297  7834.88373  7948.84810     0.00013         
     39     2.33165  7834.28622  7919.85160     0.00013         
     40     2.34034  7833.90110  7930.40430     0.00013         
     41     2.34902  7833.67816  7927.59420     0.00013         
     42     2.35771  7833.66281  7913.40330     0.00013         
     43     2.36639  7833.87030  7909.66550     0.00013         
     44     2.37507  7834.31741  7919.63430     0.00013         
     45     2.38376  7835.02258  7893.63280     0.00013         
     46     2.39244  7836.00612  7903.06880     0.00013         
     47     2.40113  7837.29049  7899.49900     0.00013         
     48     2.40981  7838.90086  7897.81540     0.00013         
     49     2.41849  7840.86403  7898.80270     0.00013         
     50     2.42718  7843.21097  7891.85500     0.00013         
     51     2.43586  7845.97575  7876.03520     0.00013         
     52     2.44455  7849.19627  7884.54050     0.00013         
     53     2.45323  7852.91516  7870.02290     0.00013         
     54     2.46191  7857.18014  7877.89400     0.00013         
     55     2.47060  7862.04469  7875.92580     0.00013         
     56     2.47928  7867.56948  7864.20020     0.00013         
     57     2.48797  7873.82299  7860.31740     0.00013         
     58     2.49665  7880.88266  7881.04590     0.00013         
     59     2.50533  7888.83711  7855.65330     0.00013         
     60     2.51402  7897.78736  7864.30180     0.00013         
     61     2.52270  7907.84905  7865.12740     0.00013         
     62     2.53139  7919.17464  7856.53470     0.00013         
     63     2.54007  7931.89291  7861.04150     0.00013         
     64     2.54875  7946.17443  7869.34520     0.00013         
     65     2.55744  7962.24095  7854.08060     0.00013         
     66     2.56612  7980.33716  7878.98340     0.00013         
     67     2.57481  8000.74812  7869.79590     0.00013         
     68     2.58349  8023.81095  7878.51120     0.00013         
     69     2.59217  8049.92964  7885.22510     0.00013         
     70     2.60086  8079.58727  7889.00630     0.00013         
     71     2.60954  8113.36347  7898.64500     0.00013         
     72     2.61823  8152.02273  7927.38570     0.00013         
     73     2.62691  8196.30742  7919.45650     0.00013         
     74     2.63559  8247.33179  7946.79050     0.00013         
     75     2.64428  8306.41266  7968.28220     0.00013         
     76     2.65296  8375.20093  7986.20650     0.00013         
     77     2.66165  8455.78368  8024.58200     0.00012         
     78     2.67033  8550.84352  8073.83590     0.00012         
     79     2.67901  8663.91525  8098.95900     0.00012         
     80     2.68770  8799.88878  8176.84670     0.00012         
     81     2.69638  8966.36636  8260.27540     0.00012         
     82     2.70507  9177.51461  8388.84570     0.00012         
     83     2.71375  9464.91548  8588.56930     0.00012         
     84     2.72243  9905.00262  9059.74120     0.00011         
     85     2.73112 10678.31670 10096.20800     0.00010         
     86     2.73980 12174.09231 12229.72300     0.00008         
     87     2.74849 15127.86927 16223.14900     0.00006         
     88     2.75717 20715.28651 22293.54700     0.00004         
     89     2.76585 30443.71690 30454.21100     0.00003         
     90     2.77454 45669.53200 42743.80500     0.00002         
     91     2.78322 66723.24163 59702.82400     0.00002         
     92     2.79191 91947.65268 84057.45300     0.00001         
     93     2.80059 117199.99898 113283.75000     0.00001       
     94     2.80927 136301.18607 138428.80000     0.00001       
     95     2.81796 143019.32821 149987.34000     0.00001       
     96     2.82664 134759.02980 143799.69000     0.00001       
     97     2.83533 114669.84431 123807.95000     0.00001       
     98     2.84401 89140.21808 95005.75000     0.00001         
     99     2.85269 64196.02043 67415.30500     0.00001         
    100     2.86138 43718.09610 47351.00800     0.00002         
    101     2.87006 29115.02138 33431.02000     0.00003         
    102     2.87875 19897.55163 23519.16800     0.00004         
    103     2.88743 14656.16787 17330.88100     0.00006         
    104     2.89611 11902.37808 12874.93300     0.00008         
    105     2.90480 10507.00174 10398.54800     0.00010         
    106     2.91348  9777.83562  9216.07130     0.00011         
    107     2.92217  9354.44430  8639.54980     0.00012         
    108     2.93085  9071.74788  8378.61520     0.00012         
    109     2.93953  8860.37121  8240.21090     0.00012         
    110     2.94822  8691.56536  8121.19340     0.00012         
    111     2.95690  8552.22653  8049.44380     0.00012         
    112     2.96559  8435.17397  7994.43650     0.00013         
    113     2.97427  8335.70733  7921.35210     0.00013         
    114     2.98295  8250.40262  7888.89750     0.00013         
    115     2.99164  8176.64894  7845.94430     0.00013         
    116     3.00032  8112.41664  7812.96240     0.00013         
    117     3.00901  8056.20625  7791.27640     0.00013         
    118     3.01769  8006.51056  7762.22750     0.00013         
    119     3.02637  7962.40960  7741.41990     0.00013         
    120     3.03506  7923.07034  7736.89160     0.00013         
    121     3.04374  7887.80320  7702.31450     0.00013         
    122     3.05243  7856.01469  7694.85450     0.00013         
    123     3.06111  7827.25053  7684.09330     0.00013         
    124     3.06979  7801.11570  7664.89550     0.00013         
    125     3.07848  7777.28071  7659.18360     0.00013         
    126     3.08716  7755.46464  7661.64360     0.00013         
    127     3.09585  7735.42907  7631.04830     0.00013         
    128     3.10453  7716.97350  7637.95120     0.00013         
    129     3.11321  7699.92151  7624.63380     0.00013         
    130     3.12190  7684.12399  7613.62890     0.00013         
    131     3.13058  7669.45310  7610.71730     0.00013         
    132     3.13927  7655.79667  7607.67630     0.00013         
    133     3.14795  7643.05743  7594.69870     0.00013         
    134     3.15663  7631.15208  7600.85350     0.00013         
    135     3.16532  7620.00691  7581.25100     0.00013         
    136     3.17400  7609.55777  7587.38280     0.00013         
    137     3.18269  7599.74986  7585.56450     0.00013         
    138     3.19137  7590.53459  7570.78660     0.00013         
    139     3.20005  7581.86992  7567.00590     0.00013         
    140     3.20874  7573.72052  7572.27930     0.00013         
    141     3.21742  7566.05547  7553.17480     0.00013         
    142     3.22611  7558.84882  7564.56590     0.00013         
    143     3.23479  7552.07996  7562.77490     0.00013         
    144     3.24347  7545.73193  7550.55470     0.00013         
    145     3.25216  7539.79219  7551.04300     0.00013         
    146     3.26084  7534.25316  7553.60890     0.00013         
    147     3.26953  7529.11115  7539.31350     0.00013         
    148     3.27821  7524.66062  7548.87790     0.00013         
    149     3.28689  7520.33512  7534.36380     0.00013         
    150     3.29558  7516.41470  7536.06150     0.00013         
    151     3.30426  7512.93085  7531.19680     0.00013         
    152     3.31295  7509.91113  7521.69380     0.00013         
    153     3.32163  7507.66577  7518.57080     0.00013         
    154     3.33031  7505.84866  7528.81010     0.00013         
    155     3.33900  7504.49737  7511.50830     0.00013         
    156     3.34768  7503.83906  7519.94040     0.00013         
    157     3.35637  7503.98321  7518.85890     0.00013         
    158     3.36505  7505.06913  7509.63130     0.00013         
    159     3.37373  7507.28138  7515.56250     0.00013         
    160     3.38242  7510.87439  7526.97410     0.00013         
    161     3.39110  7516.23241  7521.65720     0.00013         
    162     3.39979  7524.02962  7540.77690     0.00013         
    163     3.40847  7535.66774  7550.08590     0.00013         
    164     3.41715  7554.33624  7574.72170     0.00013         
    165     3.42584  7587.32564  7617.66410     0.00013         
    166     3.43452  7650.03078  7698.32030     0.00013         
    167     3.44321  7771.24292  7833.92580     0.00013         
    168     3.45189  7997.45044  8056.00630     0.00012         
    169     3.46057  8391.44291  8358.37010     0.00012         
    170     3.46926  9015.86338  8822.15720     0.00011         
    171     3.47794  9901.81548  9428.57520     0.00011         
    172     3.48663 11009.24987 10326.33800     0.00010         
    173     3.49531 12197.42679 11371.01200     0.00009         
    174     3.50399 13224.20084 12406.89600     0.00008         
    175     3.51268 13795.15375 13140.75500     0.00008         
    176     3.52136 13701.45314 13250.15200     0.00008         
    177     3.53005 12978.67177 12637.48300     0.00008         
    178     3.53873 11876.06933 11504.85900     0.00009         
    179     3.54741 10683.77604 10418.91600     0.00010         
    180     3.55610  9619.51506  9465.16410     0.00011         
    181     3.56478  8796.09896  8767.31930     0.00011         
    182     3.57347  8231.41763  8308.42970     0.00012         
    183     3.58215  7882.29695  7979.77640     0.00013         
    184     3.59083  7683.63478  7765.65580     0.00013         
    185     3.59952  7576.14808  7636.31930     0.00013         
    186     3.60820  7517.91660  7552.75590     0.00013         
    187     3.61689  7484.17847  7508.50730     0.00013         
    188     3.62557  7462.22300  7492.20850     0.00013         
    189     3.63425  7446.17628  7461.61770     0.00013         
    190     3.64294  7433.47609  7462.54830     0.00013         
    191     3.65162  7422.97899  7456.05710     0.00013         
    192     3.66031  7414.11201  7443.45310     0.00013         
    193     3.66899  7406.53350  7441.29440     0.00013         
    194     3.67767  7400.01055  7444.55030     0.00013         
    195     3.68636  7394.37081  7432.98630     0.00013         
    196     3.69504  7389.48311  7440.27690     0.00013         
    197     3.70373  7385.24671  7430.22750     0.00013         
    198     3.71241  7381.58308  7430.18410     0.00013         
    199     3.72109  7378.43140  7428.68700     0.00013         
    200     3.72978  7375.74514  7423.50000     0.00013         
    201     3.73846  7373.51123  7420.14450     0.00013         
    202     3.74715  7371.65800  7426.76120     0.00013         
    203     3.75583  7370.18949  7410.29790     0.00013         
    204     3.76451  7369.09347  7417.50390     0.00013         
    205     3.77320  7368.36354  7415.59620     0.00013         
    206     3.78188  7367.99858  7407.74070     0.00013         
    207     3.79057  7368.00662  7407.78370     0.00013         
    208     3.79925  7368.42965  7414.31250     0.00013         
    209     3.80793  7369.19988  7402.11040     0.00014         
    210     3.81662  7370.37724  7411.32130     0.00013         
    211     3.82530  7372.34337  7405.10010     0.00014         
    212     3.83399  7374.67981  7404.64840     0.00014         
    213     3.84267  7377.23523  7406.81400     0.00014         
    214     3.85135  7380.32012  7408.62890     0.00013         
    215     3.86004  7383.98916  7407.49510     0.00013         
    216     3.86872  7388.28009  7418.19240     0.00013         
    217     3.87741  7393.26520  7410.36520     0.00013         
    218     3.88609  7399.01890  7417.84330     0.00013         
    219     3.89477  7405.62847  7422.46730     0.00013         
    220     3.90346  7413.19651  7417.41600     0.00013         
    221     3.91214  7421.84517  7422.27730     0.00013         
    222     3.92083  7431.71385  7430.24900     0.00013         
    223     3.92951  7442.96972  7419.06840     0.00013         
    224     3.93819  7455.81395  7433.65190     0.00013         
    225     3.94688  7470.48605  7439.33250     0.00013         
    226     3.95556  7487.27285  7443.82710     0.00013         
    227     3.96425  7506.52202  7455.12400     0.00013         
    228     3.97293  7528.79294  7465.85450     0.00013         
    229     3.98161  7555.23796  7475.23390     0.00013         
    230     3.99030  7584.83052  7500.23540     0.00013         
    231     3.99898  7619.27353  7511.07230     0.00013         
    232     4.00767  7659.57957  7539.68360     0.00013         
    233     4.01635  7707.03624  7565.18750     0.00013         
    234     4.02503  7763.33189  7601.43750     0.00013         
    235     4.03372  7830.80947  7652.30470     0.00013         
    236     4.04240  7912.78892  7726.84720     0.00013         
    237     4.05109  8015.31378  7802.97560     0.00013         
    238     4.05977  8150.77675  7944.69680     0.00013         
    239     4.06845  8347.47505  8172.88530     0.00012         
    240     4.07714  8670.04583  8635.69630     0.00012         
    241     4.08582  9255.82259  9482.14650     0.00011         
    242     4.09451 10364.88823 11026.70800     0.00009         
    243     4.10319 12421.94295 13428.60900     0.00007         
    244     4.11187 15998.48083 16820.12300     0.00006         
    245     4.12056 21672.61917 21383.52900     0.00005         
    246     4.12924 29741.34310 27973.84000     0.00004         
    247     4.13793 39853.65077 36358.90600     0.00003         
    248     4.14661 50738.51396 47685.18000     0.00002         
    249     4.15529 60195.89995 58694.08200     0.00002         
    250     4.16398 65536.82256 65339.15200     0.00002         
    251     4.17266 64826.87346 65671.95300     0.00002         
    252     4.18135 58342.68258 59399.99600     0.00002         
    253     4.19003 48334.39349 49420.19100     0.00002         
    254     4.19871 37457.47858 37492.09800     0.00003         
    255     4.20740 27722.20192 28162.23200     0.00004         
    256     4.21608 20182.24390 21248.89500     0.00005         
    257     4.22477 15014.05363 16374.14300     0.00006         
    258     4.23345 11826.63238 12977.34600     0.00008         
    259     4.24213 10023.31858 10725.33200     0.00009         
    260     4.25082  9058.35654  9223.07810     0.00011         
    261     4.25950  8545.34224  8446.63870     0.00012         
    262     4.26819  8256.08673  8017.91360     0.00012         
    263     4.27687  8073.51303  7797.93210     0.00013         
    264     4.28555  7943.64128  7684.97170     0.00013         
    265     4.29424  7843.02213  7598.11230     0.00013         
    266     4.30292  7761.24879  7545.77980     0.00013         
    267     4.31161  7693.11050  7505.36330     0.00013         
    268     4.32029  7635.51584  7465.39550     0.00013         
    269     4.32897  7586.33862  7441.74760     0.00013         
    270     4.33766  7543.99035  7426.81300     0.00013         
    271     4.34634  7507.25433  7406.80030     0.00014         
    272     4.35503  7475.17148  7408.28220     0.00013         
    273     4.36371  7446.97569  7396.47310     0.00014         
    274     4.37239  7422.05531  7372.85250     0.00014         
    275     4.38108  7399.91532  7358.65530     0.00014         
    276     4.38976  7380.14792  7346.37060     0.00014         
    277     4.39845  7362.42054  7337.14550     0.00014         
    278     4.40713  7346.45818  7334.84230     0.00014         
    279     4.41581  7332.02907  7319.10350     0.00014         
    280     4.42450  7318.94239  7315.19870     0.00014         
    281     4.43318  7307.03480  7309.02390     0.00014         
    282     4.44187  7296.16727  7300.01510     0.00014         
    283     4.45055  7286.22433  7297.58790     0.00014         
    284     4.45923  7277.10704  7296.64550     0.00014         
    285     4.46792  7268.72926  7279.53080     0.00014         
    286     4.47660  7261.01833  7285.81150     0.00014         
    287     4.48529  7253.91205  7285.31790     0.00014         
    288     4.49397  7247.35583  7278.35400     0.00014         
    289     4.50265  7241.30377  7278.22410     0.00014         
    290     4.51134  7235.75639  7275.90090     0.00014         
    291     4.52002  7230.63757  7271.52930     0.00014         
    292     4.52871  7225.88431  7273.80960     0.00014         
    293     4.53739  7221.51050  7267.61570     0.00014         
    294     4.54607  7217.49656  7265.03860     0.00014         
    295     4.55476  7213.82769  7265.38530     0.00014         
    296     4.56344  7210.49344  7257.72850     0.00014         
    297     4.57213  7207.49500  7256.32030     0.00014         
    298     4.58081  7204.81233  7260.45120     0.00014         
    299     4.58949  7202.45869  7249.48190     0.00014         
    300     4.59818  7200.43491  7256.81400     0.00014         
    301     4.60686  7198.75544  7258.25290     0.00014         
    302     4.61555  7197.43824  7255.32370     0.00014         
    303     4.62423  7196.50838  7260.72460     0.00014         
    304     4.63291  7196.00146  7262.15430     0.00014         
    305     4.64160  7195.95874  7252.40090     0.00014         
    306     4.65028  7196.44029  7258.52590     0.00014         
    307     4.65897  7197.52189  7256.81840     0.00014         
    308     4.66765  7199.30190  7260.20360     0.00014         
    309     4.67633  7201.90988  7264.65430     0.00014         
    310     4.68502  7205.52077  7266.94820     0.00014         
    311     4.69370  7210.38706  7272.38090     0.00014         
    312     4.70239  7216.92384  7286.07030     0.00014         
    313     4.71107  7225.93195  7292.09130     0.00014         
    314     4.71975  7239.16140  7319.72560     0.00014         
    315     4.72844  7260.57272  7357.42970     0.00014         
    316     4.73712  7298.69433  7409.66550     0.00013         
    317     4.74581  7370.24140  7511.00680     0.00013         
    318     4.75449  7503.91875  7662.22070     0.00013         
    319     4.76317  7741.39605  7877.67290     0.00013         
    320     4.77186  8130.68048  8171.94340     0.00012         
    321     4.78054  8708.45496  8566.02050     0.00012         
    322     4.78923  9472.93772  9109.42680     0.00011         
    323     4.79791 10357.65908  9728.65140     0.00010         
    324     4.80659 11219.56282 10429.66200     0.00010         
    325     4.81528 11852.29644 10971.31200     0.00009         
    326     4.82396 12050.77096 11111.59500     0.00009         
    327     4.83265 11738.28911 10805.17200     0.00009         
    328     4.84133 11031.62750 10207.12100     0.00010         
    329     4.85001 10145.83142  9569.27050     0.00010         
    330     4.85870  9276.07047  8904.96580     0.00011         
    331     4.86738  8548.21150  8396.23830     0.00012         
    332     4.87607  8012.33591  8025.66990     0.00012         
    333     4.88475  7658.93452  7726.36620     0.00013         
    334     4.89343  7446.66516  7538.81200     0.00013         
    335     4.90212  7327.78816  7412.93070     0.00013         
    336     4.91080  7263.33091  7330.27830     0.00014         
    337     4.91949  7227.56689  7290.29540     0.00014         
    338     4.92817  7205.96609  7265.50050     0.00014         
    339     4.93685  7191.31194  7250.59770     0.00014         
    340     4.94554  7180.30697  7245.15580     0.00014         
    341     4.95422  7171.49026  7235.84720     0.00014         
    342     4.96291  7164.17537  7232.13530     0.00014         
    343     4.97159  7157.99249  7233.31980     0.00014         
    344     4.98027  7152.70600  7223.14940     0.00014         
    345     4.98896  7148.14660  7226.58590     0.00014         
    346     4.99764  7144.18694  7229.71390     0.00014         
    347     5.00633  7140.72768  7218.42380     0.00014         
    348     5.01501  7137.68951  7220.84770     0.00014         
    349     5.02369  7135.00968  7223.56690     0.00014         
    350     5.03238  7132.63746  7219.16210     0.00014         
    351     5.04106  7130.54045  7222.26030     0.00014         
    352     5.04975  7128.66671  7220.07760     0.00014         
    353     5.05843  7126.99667  7217.49320     0.00014         
    354     5.06711  7125.50731  7222.67430     0.00014         
    355     5.07580  7124.17930  7221.92480     0.00014         
    356     5.08448  7122.99644  7221.82280     0.00014         
    357     5.09317  7121.94471  7225.16990     0.00014         
    358     5.10185  7121.01256  7218.78910     0.00014         
    359     5.11053  7120.19014  7221.13530     0.00014         
    360     5.11922  7119.46892  7223.16750     0.00014         
    361     5.12790  7118.84174  7214.20950     0.00014         
    362     5.13659  7118.30249  7218.90720     0.00014         
    363     5.14527  7117.85782  7224.81490     0.00014         
    364     5.15395  7117.49264  7217.94090     0.00014         
    365     5.16264  7117.18862  7225.62550     0.00014         
    366     5.17132  7116.95573  7224.27830     0.00014         
    367     5.18001  7116.79131  7222.20410     0.00014         
    368     5.18869  7116.69313  7226.15580     0.00014         
    369     5.19737  7116.65938  7224.69040     0.00014         
    370     5.20606  7116.68864  7223.56930     0.00014         
    371     5.21474  7116.77986  7226.77780     0.00014         
    372     5.22343  7116.93233  7220.31980     0.00014         
    373     5.23211  7117.14563  7225.68600     0.00014         
    374     5.24079  7117.41970  7230.96290     0.00014         
    375     5.24948  7117.75478  7226.31790     0.00014         
    376     5.25816  7118.15143  7230.16060     0.00014         
    377     5.26685  7118.61051  7235.25880     0.00014         
    378     5.27553  7119.17501  7229.14360     0.00014         
    379     5.28421  7119.76443  7237.66700     0.00014         
    380     5.29290  7120.41984  7237.82130     0.00014         
    381     5.30158  7121.14497  7232.68850     0.00014         
    382     5.31027  7121.94269  7235.24220     0.00014         
    383     5.31895  7122.81643  7237.24410     0.00014         
    384     5.32763  7123.77061  7239.33010     0.00014         
    385     5.33632  7124.81300  7244.67630     0.00014         
    386     5.34500  7125.94212  7237.62550     0.00014         
    387     5.35369  7127.17822  7240.37550     0.00014         
    388     5.36237  7128.58760  7245.78960     0.00014         
    389     5.37105  7130.03182  7243.18160     0.00014         
    390     5.37974  7131.60026  7246.77640     0.00014         
    391     5.38842  7133.30562  7251.91500     0.00014         
    392     5.39711  7135.16060  7245.29490     0.00014         
    393     5.40579  7137.18361  7254.10740     0.00014         
    394     5.41447  7139.39507  7255.14310     0.00014         
    395     5.42316  7141.83667  7251.24170     0.00014         
    396     5.43184  7144.50488  7256.43800     0.00014         
    397     5.44053  7147.45079  7259.88620     0.00014         
    398     5.44921  7150.71910  7259.57180     0.00014         
    399     5.45789  7154.36418  7264.80960     0.00014         
    400     5.46658  7158.45287  7258.73540     0.00014         
    401     5.47526  7163.06900  7262.32320     0.00014         
    402     5.48395  7168.31961  7265.52490     0.00014         
    403     5.49263  7174.34214  7266.97070     0.00014         
    404     5.50131  7181.32139  7272.72950     0.00014         
    405     5.51000  7189.52690  7282.06300     0.00014         
    406     5.51868  7199.40420  7275.81150     0.00014         
    407     5.52737  7211.81703  7290.26370     0.00014         
    408     5.53605  7228.62671  7300.18800     0.00014         
    409     5.54473  7253.90830  7312.60010     0.00014         
    410     5.55342  7296.13354  7350.44920     0.00014         
    411     5.56210  7371.28180  7418.85840     0.00013         
    412     5.57079  7505.72002  7528.41110     0.00013         
    413     5.57947  7736.27051  7695.52690     0.00013         
    414     5.58815  8103.58351  7917.04590     0.00013         
    415     5.59684  8636.25858  8258.38180     0.00012         
    416     5.60552  9328.33550  8699.65630     0.00011         
    417     5.61421 10118.46311  9355.46580     0.00011         
    418     5.62289 10880.21582 10021.24300     0.00010         
    419     5.63157 11433.62003 10482.14400     0.00010         
    420     5.64026 11601.52035 10529.88500     0.00009         
    421     5.64894 11320.59219 10213.90000     0.00010         
    422     5.65763 10695.44619  9676.01560     0.00010         
    423     5.66631  9913.38706  9048.14360     0.00011         
    424     5.67499  9143.42976  8564.34180     0.00012         
    425     5.68368  8493.94367  8188.88330     0.00012         
    426     5.69236  8010.18438  7907.61570     0.00013         
    427     5.70105  7686.55394  7700.32960     0.00013         
    428     5.70973  7489.17051  7549.66800     0.00013         
    429     5.71841  7377.24089  7450.25150     0.00013         
    430     5.72710  7316.43882  7398.15720     0.00014         
    431     5.73578  7283.36211  7369.44140     0.00014         
    432     5.74447  7264.38017  7357.89110     0.00014         
    433     5.75315  7252.47857  7360.01950     0.00014         
    434     5.76183  7244.34971  7348.06690     0.00014         
    435     5.77052  7238.49035  7354.63530     0.00014         
    436     5.77920  7234.19051  7354.52930     0.00014         
    437     5.78789  7231.07068  7350.57030     0.00014         
    438     5.79657  7228.89618  7357.02830     0.00014         
    439     5.80525  7227.49679  7361.94240     0.00014         
    440     5.81394  7226.75090  7360.43600     0.00014         
    441     5.82262  7226.56377  7367.07420     0.00014         
    442     5.83131  7226.86198  7367.03520     0.00014         
    443     5.83999  7227.58837  7369.75000     0.00014         
    444     5.84867  7228.69878  7375.08250     0.00014         
    445     5.85736  7230.15925  7376.30470     0.00014         
    446     5.86604  7231.94410  7381.74510     0.00014         
    447     5.87473  7234.04327  7387.99850     0.00014         
    448     5.88341  7236.42768  7381.51030     0.00014         
    449     5.89209  7239.09824  7388.20360     0.00014         
    450     5.90078  7242.05296  7393.49410     0.00014         
    451     5.90946  7245.29415  7392.84470     0.00014         
    452     5.91815  7248.82854  7402.17530     0.00014         
    453     5.92683  7252.66822  7416.06100     0.00013         
    454     5.93551  7256.82984  7420.80420     0.00013         
    455     5.94420  7261.33542  7431.51610     0.00013         
    456     5.95288  7266.21423  7423.31400     0.00013         
    457     5.96157  7271.50173  7419.40280     0.00013         
    458     5.97025  7277.24234  7422.01810     0.00013         
    459     5.97893  7283.49179  7425.56350     0.00013         
    460     5.98762  7290.31927  7435.01900     0.00013         
    461     5.99630  7297.81008  7446.69290     0.00013         
    462     6.00499  7306.06161  7457.73680     0.00013         
    463     6.01367  7315.20774  7480.93700     0.00013         
    464     6.02235  7325.41842  7486.68460     0.00013         
    465     6.03104  7336.89852  7492.55320     0.00013         
    466     6.03972  7349.90065  7496.53910     0.00013         
    467     6.04841  7364.78980  7513.12740     0.00013         
    468     6.05709  7382.08472  7534.25980     0.00013         
    469     6.06577  7402.62596  7555.95260     0.00013         
    470     6.07446  7428.00491  7577.38040     0.00013         
    471     6.08314  7461.58005  7603.00390     0.00013         
    472     6.09183  7510.59461  7654.49710     0.00013         
    473     6.10051  7589.97684  7750.40090     0.00013         
    474     6.10919  7727.81518  7930.14260     0.00013         
    475     6.11788  7970.69901  8243.12600     0.00012         
    476     6.12656  8384.45716  8752.98730     0.00011         
    477     6.13525  9043.83889  9486.85450     0.00011         
    478     6.14393 10006.02594 10447.87100     0.00010         
    479     6.15261 11271.23660 11823.48300     0.00008         
    480     6.16130 12744.01157 13466.88900     0.00007         
    481     6.16998 14211.04609 15261.88700     0.00007         
    482     6.17867 15352.09864 16915.03100     0.00006         
    483     6.18735 15823.22657 17500.61100     0.00006         
    484     6.19603 15451.46389 16887.39300     0.00006         
    485     6.20472 14377.89905 15190.92300     0.00007         
    486     6.21340 12938.79692 13359.10600     0.00007         
    487     6.22209 11463.12448 11685.90600     0.00009         
    488     6.23077 10177.41339 10382.58100     0.00010         
    489     6.23945  9189.53262  9520.99800     0.00011         
    490     6.24814  8508.11426  8840.53030     0.00011         
    491     6.25682  8080.22318  8357.33010     0.00012         
    492     6.26551  7831.44201  8048.80030     0.00012         
    493     6.27419  7694.17844  7836.56740     0.00013         
    494     6.28287  7619.61637  7734.54540     0.00013         
    495     6.29156  7577.85765  7686.65580     0.00013         
    496     6.30024  7552.81956  7654.71780     0.00013         
    497     6.30893  7536.64220  7645.50200     0.00013         
    498     6.31761  7525.68087  7634.97950     0.00013         
    499     6.32629  7518.22559  7631.41310     0.00013         
    500     6.33498  7513.39389  7633.56400     0.00013         
    501     6.34366  7510.65892  7631.18310     0.00013         
    502     6.35235  7509.66526  7634.39940     0.00013         
    503     6.36103  7510.15365  7637.72360     0.00013         
    504     6.36971  7511.92922  7633.85010     0.00013         
    505     6.37840  7514.84400  7640.25540     0.00013         
    506     6.38708  7518.79592  7647.43750     0.00013         
    507     6.39577  7523.69623  7641.93950     0.00013         
    508     6.40445  7529.46496  7654.51950     0.00013         
    509     6.41313  7536.07481  7658.25340     0.00013         
    510     6.42182  7543.50256  7663.17290     0.00013         
    511     6.43050  7551.73729  7670.38090     0.00013         
    512     6.43919  7560.77561  7675.76030     0.00013         
    513     6.44787  7570.63550  7679.53910     0.00013         
    514     6.45655  7581.34206  7689.87260     0.00013         
    515     6.46524  7592.93197  7691.28860     0.00013         
    516     6.47392  7605.45678  7704.09670     0.00013         
    517     6.48261  7618.98069  7711.17680     0.00013         
    518     6.49129  7633.57718  7714.81590     0.00013         
    519     6.49997  7649.34436  7723.67480     0.00013         
    520     6.50866  7666.39489  7735.87300     0.00013         
    521     6.51734  7684.86330  7737.94530     0.00013         
    522     6.52603  7704.91441  7753.95460     0.00013         
    523     6.53471  7726.74099  7766.22220     0.00013         
    524     6.54339  7750.57883  7775.14600     0.00013         
    525     6.55208  7776.71695  7792.32670     0.00013         
    526     6.56076  7805.46546  7805.06640     0.00013         
    527     6.56945  7837.24905  7821.91700     0.00013         
    528     6.57813  7872.57744  7841.76710     0.00013         
    529     6.58681  7912.07092  7860.41750     0.00013         
    530     6.59550  7956.51081  7890.27590     0.00013         
    531     6.60418  8006.90347  7924.62500     0.00013         
    532     6.61287  8064.51252  7962.24710     0.00013         
    533     6.62155  8131.16826  8014.44090     0.00012         
    534     6.63023  8209.71439  8080.67920     0.00012         
    535     6.63892  8305.26579  8165.24800     0.00012         
    536     6.64760  8428.18941  8307.62990     0.00012         
    537     6.65629  8600.27028  8513.67290     0.00012         
    538     6.66497  8865.93317  8903.76760     0.00011         
    539     6.67365  9308.75949  9540.51660     0.00010         
    540     6.68234 10068.66896 10604.95200     0.00009         
    541     6.69102 11347.17644 12226.66700     0.00008         
    542     6.69971 13381.53781 14343.91400     0.00007         
    543     6.70839 16371.74475 16974.88700     0.00006         
    544     6.71707 20363.24383 20592.61900     0.00005         
    545     6.72576 25122.50749 24746.51600     0.00004         
    546     6.73444 30055.07357 30143.11500     0.00003         
    547     6.74313 34206.47846 34888.18400     0.00003         
    548     6.75181 36453.70349 37277.70300     0.00003         
    549     6.76049 36063.29606 36481.83600     0.00003         
    550     6.76918 33283.95532 33038.81600     0.00003         
    551     6.77786 29163.79014 28669.96300     0.00003         
    552     6.78655 24872.28107 24119.29500     0.00004         
    553     6.79523 21303.63068 21122.95500     0.00005         
    554     6.80391 18963.49602 19274.89300     0.00005         
    555     6.81260 17987.90191 18301.95100     0.00005         
    556     6.82128 18219.41835 18269.77700     0.00005         
    557     6.82997 19305.22916 19165.98800     0.00005         
    558     6.83865 20772.72735 20832.95300     0.00005         
    559     6.84733 22072.91857 22368.06100     0.00004         
    560     6.85602 22668.76799 23083.97100     0.00004         
    561     6.86470 22251.02189 22440.49600     0.00004         
    562     6.87338 20915.57406 20585.62700     0.00005         
    563     6.88207 19042.40591 18014.55500     0.00006         
    564     6.89075 17033.54990 15731.20000     0.00006         
    565     6.89944 15179.52242 14034.82800     0.00007         
    566     6.90812 13648.29250 12702.03800     0.00008         
    567     6.91681 12511.12389 11816.66100     0.00008         
    568     6.92549 11775.02821 11250.67000     0.00009         
    569     6.93417 11422.19114 11011.68700     0.00009         
    570     6.94286 11455.52277 11193.15100     0.00009         
    571     6.95154 11945.15427 11911.61200     0.00008         
    572     6.96023 13069.24613 13370.39900     0.00007         
    573     6.96891 15132.43756 15564.71100     0.00006         
    574     6.97759 18536.49032 18970.87100     0.00005         
    575     6.98628 23678.05300 23487.27900     0.00004         
    576     6.99496 30765.99240 29390.00000     0.00003         
    577     7.00364 39601.17660 37365.95300     0.00003         
    578     7.01233 49388.82851 47288.55100     0.00002         
    579     7.02101 58634.15183 57764.13300     0.00002         
    580     7.02970 65238.78323 67357.27300     0.00001         
    581     7.03838 67156.77461 70956.02300     0.00001         
    582     7.04707 63707.68569 66787.20300     0.00001         
    583     7.05575 56165.90292 56839.72300     0.00002         
    584     7.06443 46731.50674 46028.45300     0.00002         
    585     7.07312 37367.50668 36224.57000     0.00003         
    586     7.08180 29393.38504 28758.71700     0.00003         
    587     7.09049 23487.84876 23940.35400     0.00004         
    588     7.09917 19813.99711 20658.29900     0.00005         
    589     7.10785 18179.92489 18758.11700     0.00005         
    590     7.11654 18192.64321 18271.30300     0.00005         
    591     7.12522 19356.51901 19095.20100     0.00005         
    592     7.13390 21107.04375 20796.46100     0.00005         
    593     7.14259 22815.73287 22711.72100     0.00004         
    594     7.15127 23850.74809 24138.57000     0.00004         
    595     7.15996 23801.14935 24526.56600     0.00004         
    596     7.16864 22685.66084 23786.91200     0.00004         
    597     7.17733 20821.66789 22253.21300     0.00004         
    598     7.18601 18572.65375 20336.25400     0.00005         
    599     7.19469 16268.34900 18030.06400     0.00006         
    600     7.20338 14180.64952 15708.71900     0.00006         
    601     7.21206 12470.77122 13721.32700     0.00007         
    602     7.22075 11180.09751 12062.40400     0.00008         
    603     7.22943 10268.79117 10835.09400     0.00009         
    604     7.23811  9659.22392 10057.24000     0.00010         
    605     7.24680  9267.35694  9471.06540     0.00011         
    606     7.25548  9020.50865  9108.73440     0.00011         
    607     7.26416  8864.10847  8879.71090     0.00011         
    608     7.27285  8761.58613  8725.35740     0.00011         
    609     7.28153  8690.72188  8643.80470     0.00012         
    610     7.29022  8639.04859  8591.58980     0.00012           
    611     7.29890  8599.97222  8560.81740     0.00012           
    612     7.30759  8570.12141  8544.00880     0.00012           
    613     7.31627  8547.79009  8527.67870     0.00012           
    614     7.32495  8532.19917  8525.94140     0.00012           
    615     7.33364  8523.31330  8530.68260     0.00012           
    616     7.34232  8522.09925  8530.01950     0.00012           
    617     7.35101  8531.40748  8547.19140     0.00012           
    618     7.35969  8557.57770  8572.78030     0.00012           
    619     7.36837  8612.95101  8625.64160     0.00012           
    620     7.37706  8718.51002  8725.11130     0.00011           
    621     7.38574  8904.99763  8878.15530     0.00011           
    622     7.39442  9209.56259  9098.95700     0.00011           
    623     7.40311  9665.47344  9380.70510     0.00011           
    624     7.41179 10284.80666  9719.26560     0.00010           
    625     7.42048 11038.84208 10200.39600     0.00010           
    626     7.42916 11843.43487 10730.72500     0.00009           
    627     7.43785 12554.91337 11300.92000     0.00009           
    628     7.44653 12990.28083 11694.93800     0.00009           
    629     7.45521 13002.97169 11731.39600     0.00009           
    630     7.46390 12589.39319 11391.13900     0.00009           
    631     7.47258 11892.11442 10867.19100     0.00009           
    632     7.48127 11094.41828 10331.81200     0.00010           
    633     7.48995 10342.12899  9834.03520     0.00010           
    634     7.49863  9721.82902  9486.05270     0.00011           
    635     7.50732  9264.06044  9209.47460     0.00011           
    636     7.51600  8957.93556  8998.02730     0.00011           
    637     7.52468  8770.55066  8851.68550     0.00011           
    638     7.53337  8664.39751  8753.98340     0.00011           
    639     7.54205  8608.18408  8699.69820     0.00011           
    640     7.55074  8580.27030  8678.37400     0.00012           
    641     7.55942  8567.70615  8663.77830     0.00012           
    642     7.56811  8563.57380  8662.91600     0.00012           
    643     7.57679  8564.46455  8666.72660     0.00012           
    644     7.58547  8568.76434  8666.76170     0.00012           
    645     7.59416  8575.70243  8681.36910     0.00012           
    646     7.60284  8584.85766  8689.04880     0.00012           
    647     7.61153  8596.01057  8700.67380     0.00011           
    648     7.62021  8609.03011  8713.77830     0.00011           
    649     7.62889  8623.85694  8720.75680     0.00011           
    650     7.63758  8640.50918  8732.02440     0.00011           
    651     7.64626  8659.11350  8747.89450     0.00011           
    652     7.65494  8679.95003  8759.69430     0.00011           
    653     7.66363  8703.65803  8785.19040     0.00011           
    654     7.67231  8731.40069  8811.29390     0.00011           
    655     7.68100  8765.11255  8839.56930     0.00011           
    656     7.68968  8807.60636  8888.47560     0.00011           
    657     7.69837  8862.29036  8943.46390     0.00011           
    658     7.70705  8932.30416  9008.59080     0.00011           
    659     7.71573  9019.05729  9095.07420     0.00011           
    660     7.72442  9120.51665  9187.58590     0.00011           
    661     7.73310  9229.89864  9308.70310     0.00011           
    662     7.74179  9335.25334  9422.40140     0.00011           
    663     7.75047  9420.94111  9501.83300     0.00011           
    664     7.75915  9473.91379  9535.43360     0.00010           
    665     7.76784  9493.34353  9508.58300     0.00011           
    666     7.77652  9491.91197  9436.27250     0.00011           
    667     7.78520  9486.87468  9376.58200     0.00011           
    668     7.79389  9492.79326  9338.46190     0.00011           
    669     7.80257  9519.61743  9317.85840     0.00011           
    670     7.81126  9573.39641  9333.85450     0.00011           
    671     7.81994  9658.54453  9370.33590     0.00011           
    672     7.82863  9781.32623  9460.80470     0.00011           
    673     7.83731  9954.47770  9608.62790     0.00010           
    674     7.84599 10201.91938  9855.51950     0.00010           
    675     7.85468 10562.28582 10233.36800     0.00010           
    676     7.86336 11089.92229 10769.40500     0.00009           
    677     7.87205 11850.91207 11532.05600     0.00009           
    678     7.88073 12913.56969 12688.99100     0.00008           
    679     7.88941 14334.62095 14167.99400     0.00007           
    680     7.89810 16142.11511 16278.07600     0.00006           
    681     7.90678 18313.25287 18716.27300     0.00005           
    682     7.91546 20758.26405 21322.77100     0.00005           
    683     7.92415 23351.81102 24166.34200     0.00004           
    684     7.93283 26013.10015 27271.97500     0.00004           
    685     7.94152 28713.13266 30504.45900     0.00003           
    686     7.95020 31390.33972 34032.45300     0.00003           
    687     7.95889 33974.61637 36509.98000     0.00003           
    688     7.96757 36600.28685 38013.88700     0.00003           
    689     7.97625 39687.83999 39121.95700     0.00003           
    690     7.98494 43650.78172 41226.58200     0.00002           
    691     7.99362 48544.68002 45602.04700     0.00002           
    692     8.00230 53882.37822 52006.48400     0.00002           
    693     8.01099 58574.63584 57956.02300     0.00002           
    694     8.01967 61140.89465 61362.15200     0.00002           
    695     8.02836 60440.47494 60159.16800     0.00002           
    696     8.03704 56477.57098 54364.26200     0.00002           
    697     8.04572 50282.48040 45783.18800     0.00002           
    698     8.05441 43107.93232 37579.41000     0.00003           
    699     8.06309 35942.51692 30832.48800     0.00003           
    700     8.07178 29464.22266 24984.81300     0.00004           
    701     8.08046 24065.49000 20637.20500     0.00005           
    702     8.08914 19873.35570 17086.20900     0.00006           
    703     8.09783 16809.84733 14439.39200     0.00007           
    704     8.10651 14682.04087 12763.56600     0.00008           
    705     8.11520 13258.45560 11680.50600     0.00009           
    706     8.12388 12324.15680 10976.49100     0.00009           
    707     8.13257 11708.34850 10584.20900     0.00009           
    708     8.14125 11290.53961 10299.61700     0.00010           
    709     8.14993 10993.29182 10126.34000     0.00010           
    710     8.15862 10770.61143 10008.88700     0.00010           
    711     8.16730 10596.37503  9916.81350     0.00010           
    712     8.17599 10455.97090  9861.21580     0.00010           
    713     8.18467 10340.96516  9814.65530     0.00010           
    714     8.19335 10246.16726  9787.91800     0.00010           
    715     8.20204 10168.09601  9772.79590     0.00010           
    716     8.21072 10104.34542  9757.94340     0.00010           
    717     8.21941 10053.30850  9761.09470     0.00010           
    718     8.22809 10014.19745  9770.13870     0.00010           
    719     8.23677  9987.42030  9783.87300     0.00010           
    720     8.24546  9975.41973  9826.30270     0.00010           
    721     8.25414  9983.97662  9887.76560     0.00010           
    722     8.26282 10023.94177  9999.35740     0.00010           
    723     8.27151 10112.46705 10180.53900     0.00010           
    724     8.28019 10272.21498 10436.36400     0.00010           
    725     8.28888 10527.00333 10801.22100     0.00009           
    726     8.29756 10892.61866 11246.13100     0.00009           
    727     8.30624 11364.90424 11838.21800     0.00008           
    728     8.31493 11908.09863 12618.87400     0.00008           
    729     8.32361 12448.16808 13452.85100     0.00007           
    730     8.33230 12874.73420 14195.09700     0.00007           
    731     8.34098 13067.73222 14578.23700     0.00007           
    732     8.34966 12965.15040 14373.21500     0.00007           
    733     8.35835 12615.75712 13659.12600     0.00007           
    734     8.36703 12142.47511 12827.55500     0.00008           
    735     8.37572 11673.46658 12101.32300     0.00008           
    736     8.38440 11311.75221 11587.44700     0.00009           
    737     8.39309 11132.96560 11328.54700     0.00009           
    738     8.40177 11189.76903 11284.24100     0.00009           
    739     8.41045 11514.35022 11453.07200     0.00009           
    740     8.41914 12113.76596 11821.52100     0.00008           
    741     8.42782 12956.90791 12461.93100     0.00008           
    742     8.43651 13958.35149 13364.70100     0.00007           
    743     8.44519 14966.43516 14381.68100     0.00007           
    744     8.45387 15765.10389 15289.66800     0.00007           
    745     8.46256 16121.26866 15713.66200     0.00006           
    746     8.47124 15909.12473 15378.62100     0.00007           
    747     8.47993 15210.44030 14445.49200     0.00007           
    748     8.48861 14244.42545 13383.72700     0.00007           
    749     8.49729 13231.04855 12435.17400     0.00008           
    750     8.50598 12326.04220 11702.64600     0.00009           
    751     8.51466 11611.26802 11198.31200     0.00009           
    752     8.52335 11105.96471 10838.54000     0.00009           
    753     8.53203 10786.59059 10584.68500     0.00009           
    754     8.54071 10610.21110 10440.79300     0.00010           
    755     8.54940 10533.38525 10368.11200     0.00010           
    756     8.55808 10522.97680 10360.92600     0.00010           
    757     8.56676 10559.86023 10399.13400     0.00010           
    758     8.57545 10639.31323 10480.67400     0.00010           
    759     8.58413 10771.21288 10642.64900     0.00009           
    760     8.59282 10981.98885 10907.43100     0.00009           
    761     8.60150 11317.79580 11364.23800     0.00009           
    762     8.61018 11846.60243 11993.94100     0.00008           
    763     8.61887 12658.95639 12939.86000     0.00008           
    764     8.62755 13858.18653 14337.95100     0.00007           
    765     8.63624 15547.77168 16326.17500     0.00006           
    766     8.64492 17806.71276 19112.53700     0.00005           
    767     8.65360 20648.91591 22541.86700     0.00004           
    768     8.66229 23972.03288 25914.60700     0.00004           
    769     8.67097 27534.86276 29227.73600     0.00003           
    770     8.67966 31016.62520 32193.20900     0.00003           
    771     8.68834 34045.60148 34794.46500     0.00003           
    772     8.69703 36104.30804 37030.05100     0.00003           
    773     8.70571 36549.45249 37652.00400     0.00003           
    774     8.71439 35003.78359 35811.71500     0.00003           
    775     8.72308 31770.20143 31829.19900     0.00003           
    776     8.73176 27647.62189 27132.42000     0.00004           
    777     8.74045 23438.12641 22722.16400     0.00004           
    778     8.74913 19699.39234 19068.63500     0.00005           
    779     8.75781 16717.93870 16548.34800     0.00006           
    780     8.76650 14551.26891 14568.27700     0.00007           
    781     8.77518 13102.38050 13147.72300     0.00008           
    782     8.78387 12200.38640 12191.64900     0.00008           
    783     8.79255 11668.60376 11549.87700     0.00009           
    784     8.80123 11363.12112 11192.90400     0.00009           
    785     8.80992 11183.99228 11015.95100     0.00009           
    786     8.81860 11070.01575 10905.75200     0.00009           
    787     8.82728 10988.68457 10848.02700     0.00009           
    788     8.83597 10925.78887 10804.75600     0.00009           
    789     8.84465 10876.44099 10784.41300     0.00009           
    790     8.85334 10839.27437 10778.00800     0.00009           
    791     8.86202 10813.84174 10768.27300     0.00009           
    792     8.87070 10799.67875 10778.86600     0.00009           
    793     8.87939 10796.15621 10788.34900     0.00009           
    794     8.88807 10802.60975 10805.86200     0.00009           
    795     8.89676 10818.72860 10836.70000     0.00009           
    796     8.90544 10845.01437 10871.50700     0.00009           
    797     8.91412 10883.58707 10922.80200     0.00009           
    798     8.92281 10939.73549 10997.32700     0.00009           
    799     8.93149 11024.69127 11096.34900     0.00009           
    800     8.94018 11160.03958 11280.91400     0.00009           
    801     8.94886 11383.14858 11561.55300     0.00009           
    802     8.95755 11751.27934 12049.45000     0.00008           
    803     8.96623 12339.72346 12739.31700     0.00008           
    804     8.97491 13229.09739 13671.95900     0.00007           
    805     8.98360 14478.21707 14874.85400     0.00007           
    806     8.99228 16087.81514 16472.92000     0.00006           
    807     9.00097 17965.05374 18432.73200     0.00005           
    808     9.00965 19899.44797 20944.20100     0.00005           
    809     9.01833 21559.85914 23245.05900     0.00004           
    810     9.02702 22559.49945 24659.47100     0.00004           
    811     9.03570 22652.78356 24824.36300     0.00004           
    812     9.04439 21926.11704 23676.50600     0.00004           
    813     9.05307 20703.67384 21776.94300     0.00005           
    814     9.06175 19302.35631 19869.89500     0.00005           
    815     9.07044 17909.03914 18321.60700     0.00005           
    816     9.07912 16593.86286 16906.50200     0.00006           
    817     9.08780 15387.85757 15578.60800     0.00006           
    818     9.09649 14329.16204 14386.47900     0.00007           
    819     9.10517 13448.07041 13354.16300     0.00007           
    820     9.11386 12751.32501 12619.24500     0.00008           
    821     9.12254 12227.39965 12135.42100     0.00008           
    822     9.13122 11853.97806 11791.03900     0.00008           
    823     9.13991 11602.86058 11574.68900     0.00009           
    824     9.14859 11443.93921 11418.23300     0.00009           
    825     9.15728 11349.47288 11321.33000     0.00009           
    826     9.16596 11297.19595 11268.86100     0.00009           
    827     9.17464 11271.34135 11236.34800     0.00009           
    828     9.18333 11261.91991 11230.28700     0.00009           
    829     9.19201 11263.19708 11226.77100     0.00009           
    830     9.20070 11272.13119 11228.95400     0.00009           
    831     9.20938 11287.22001 11244.13400     0.00009           
    832     9.21807 11307.78937 11253.55000     0.00009           
    833     9.22675 11333.61620 11277.33200     0.00009           
    834     9.23543 11364.76895 11303.41500     0.00009           
    835     9.24412 11401.52928 11325.55500     0.00009           
    836     9.25280 11444.38973 11361.65400     0.00009   
    837     9.26149 11494.07762 11400.32700     0.00009   
    838     9.27017 11551.60463 11438.57700     0.00009   
    839     9.27885 11618.36571 11500.47300     0.00009   
    840     9.28754 11696.40374 11565.13400     0.00009   
    841     9.29622 11788.89728 11651.76700     0.00009   
    842     9.30490 11901.42377 11769.84400     0.00008   
    843     9.31359 12044.66479 11916.60900     0.00008   
    844     9.32227 12239.75621 12139.84600     0.00008   
    845     9.33096 12527.40204 12464.67500     0.00008   
    846     9.33964 12981.18713 12976.66100     0.00008   
    847     9.34832 13721.16825 13874.71000     0.00007   
    848     9.35701 14919.86972 15149.81200     0.00007   
    849     9.36569 16786.92529 17097.58800     0.00006   
    850     9.37438 19519.61354 19576.38700     0.00005   
    851     9.38306 23218.04956 22774.31100     0.00004   
    852     9.39174 27786.06823 26938.83400     0.00004   
    853     9.40043 32842.00636 32206.36700     0.00003   
    854     9.40911 37672.35732 37869.14800     0.00003   
    855     9.41780 41270.52155 43136.35200     0.00002   
    856     9.42648 42636.49259 45762.92200     0.00002   
    857     9.43516 41413.83463 44499.41400     0.00002   
    858     9.44385 38221.76551 40425.23400     0.00002   
    859     9.45253 34179.83169 35380.53100     0.00003   
    860     9.46122 30286.79531 30830.15800     0.00003   
    861     9.46990 27163.85709 27647.20100     0.00004   
    862     9.47859 25023.27178 25856.07200     0.00004   
    863     9.48727 23717.78379 24910.47500     0.00004   
    864     9.49595 22853.38230 24158.36500     0.00004   
    865     9.50464 21989.60347 23112.34600     0.00004   
    866     9.51332 20880.81037 21557.40400     0.00005   
    867     9.52201 19557.08231 19859.53700     0.00005   
    868     9.53069 18191.73642 18342.11300     0.00005   
    869     9.53937 16965.28135 17141.22300     0.00006   
    870     9.54806 16017.34216 16385.99800     0.00006   
    871     9.55674 15448.72812 16078.76000     0.00006   
    872     9.56542 15345.33583 16246.60300     0.00006   
    873     9.57411 15815.23920 17019.17400     0.00006   
    874     9.58279 17020.30742 18646.57000     0.00005   
    875     9.59148 19178.73105 21071.93200     0.00005   
    876     9.60016 22520.28801 24496.03500     0.00004   
    877     9.60884 27185.67358 28949.36300     0.00003   
    878     9.61753 33092.90405 34630.38700     0.00003   
    879     9.62621 39806.93414 41211.00000     0.00002   
    880     9.63490 46462.02965 48998.94500     0.00002   
    881     9.64358 51799.99461 55649.07000     0.00002   
    882     9.65226 54432.90971 59106.47300     0.00002   
    883     9.66095 53465.47204 58282.70300     0.00002   
    884     9.66963 49171.74961 52966.67200     0.00002   
    885     9.67832 42826.57811 45098.87100     0.00002   
    886     9.68700 35876.12768 36770.72300     0.00003   
    887     9.69568 29407.38382 30022.08000     0.00003   
    888     9.70437 24040.93560 24608.30700     0.00004   
    889     9.71305 19990.91205 20661.91400     0.00005   
    890     9.72174 17173.27634 17766.84200     0.00006   
    891     9.73042 15341.85364 15633.77300     0.00006   
    892     9.73911 14209.03592 14241.40900     0.00007   
    893     9.74779 13524.19461 13388.54300     0.00007   
    894     9.75647 13104.84205 12831.97200     0.00008   
    895     9.76516 12835.14580 12515.70100     0.00008   
    896     9.77384 12648.83891 12302.92900     0.00008   
    897     9.78253 12510.92575 12154.72900     0.00008   
    898     9.79121 12403.84025 12047.88800     0.00008   
    899     9.79989 12318.92647 11965.38900     0.00008   
    900     9.80858 12251.94908 11909.82300     0.00008   
    901     9.81726 12200.98620 11862.77600     0.00008   
    902     9.82594 12165.25818 11831.82900     0.00008   
    903     9.83463 12144.30821 11810.60700     0.00008   
    904     9.84331 12137.17950 11781.96600     0.00008   
    905     9.85200 12141.63137 11775.43200     0.00008   
    906     9.86068 12153.53933 11769.13800     0.00008   
    907     9.86936 12166.59521 11761.40500     0.00009   
    908     9.87805 12172.84132 11764.29800     0.00009   
    909     9.88673 12165.44345 11754.96700     0.00009   
    910     9.89542 12143.14461 11746.79600     0.00009   
    911     9.90410 12111.09143 11745.23800     0.00009   
    912     9.91278 12076.73628 11746.06800     0.00009   
    913     9.92147 12046.30770 11755.58700     0.00009   
    914     9.93015 12023.76616 11764.80100     0.00008   
    915     9.93884 12010.92491 11758.80000     0.00009   
    916     9.94752 12007.92441 11769.81400     0.00008   
    917     9.95620 12013.89422 11778.51400     0.00008   
    918     9.96489 12027.66400 11785.89900     0.00008   
    919     9.97357 12048.05477 11806.43100     0.00008   
    920     9.98226 12074.43600 11819.13300     0.00008   
    921     9.99094 12106.56882 11839.93400     0.00008   
    922     9.99963 12144.60913 11867.35100     0.00008   
    923    10.00831 12189.02737 11892.91900     0.00008   
    924    10.01699 12240.59557 11931.17900     0.00008   
    925    10.02568 12300.31138 11976.19000     0.00008   
    926    10.03436 12369.50119 12019.07000     0.00008   
    927    10.04304 12449.88616 12087.20800     0.00008   
    928    10.05173 12543.82546 12164.48300     0.00008   
    929    10.06041 12654.56759 12256.19500     0.00008   
    930    10.06910 12787.32039 12385.41500     0.00008   
    931    10.07778 12950.37800 12542.46000     0.00008   
    932    10.08647 13157.65953 12776.43900     0.00008   
    933    10.09515 13432.19330 13112.24200     0.00008   
    934    10.10383 13811.02334 13581.88900     0.00007   
    935    10.11252 14351.50127 14277.32800     0.00007   
    936    10.12120 15139.91501 15225.67100     0.00007   
    937    10.12989 16301.48845 16617.87900     0.00006   
    938    10.13857 18013.85343 18751.81300     0.00005   
    939    10.14725 20515.25366 21778.88700     0.00005   
    940    10.15594 24093.05891 26201.49600     0.00004   
    941    10.16462 29028.87569 31644.67400     0.00003   
    942    10.17330 35502.63296 37795.39100     0.00003   
    943    10.18199 43481.89556 44918.28900     0.00002   
    944    10.19067 52628.98370 53288.77000     0.00002   
    945    10.19936 62136.21431 63126.61300     0.00002   
    946    10.20804 70554.76223 73453.96100     0.00001   
    947    10.21672 75874.61183 80271.21100     0.00001   
    948    10.22541 76288.03152 80402.31300     0.00001   
    949    10.23409 71479.91246 73893.00000     0.00001   
    950    10.24278 62937.60426 63062.29300     0.00002   
    951    10.25146 52819.91170 51124.31300     0.00002   
    952    10.26015 42928.01321 40788.96900     0.00002   
    953    10.26883 34405.61529 33060.66000     0.00003   
    954    10.27751 27769.89340 27007.37900     0.00004   
    955    10.28620 23052.97579 22619.75600     0.00004   
    956    10.29488 19975.22936 19477.52900     0.00005   
    957    10.30357 18135.54320 17364.30900     0.00006   
    958    10.31225 17151.89922 16228.49900     0.00006   
    959    10.32093 16738.36883 15796.21500     0.00006   
    960    10.32962 16730.46117 15824.43500     0.00006   
    961    10.33830 17087.90461 16277.02200     0.00006   
    962    10.34699 17899.51041 17342.87900     0.00006   
    963    10.35567 19401.53973 19270.22900     0.00005   
    964    10.36435 21999.38120 22515.23600     0.00004   
    965    10.37304 26261.56211 27607.66400     0.00004   
    966    10.38172 32847.53106 34481.05900     0.00003   
    967    10.39040 42324.04146 43298.87100     0.00002   
    968    10.39909 54899.50143 54967.52300     0.00002   
    969    10.40777 70116.87065 69683.13300     0.00001   
    970    10.41646 86598.69522 88230.81300     0.00001   
    971    10.42514 101898.13267 108074.41000     0.00001 
    972    10.43383 112660.15742 122576.84000     0.00001 
    973    10.44251 115685.94335 126015.45000     0.00001 
    974    10.45119 110019.84309 117621.73000     0.00001 
    975    10.45988 97787.71649 100400.89000     0.00001  
    976    10.46856 82570.88690 80965.90600     0.00001   
    977    10.47724 67573.38393 64337.12500     0.00002   
    978    10.48593 54962.87737 52592.48800     0.00002   
    979    10.49461 45878.50043 44509.34400     0.00002   
    980    10.50330 40579.12817 40107.14100     0.00002   
    981    10.51198 38686.30807 38196.61300     0.00003   
    982    10.52066 39449.36353 38229.58200     0.00003   
    983    10.52935 42003.02455 39778.12900     0.00003   
    984    10.53803 45510.01540 42545.26600     0.00002   
    985    10.54672 49081.77945 46174.35900     0.00002   
    986    10.55540 51651.83957 49537.00800     0.00002   
    987    10.56409 52134.62272 51030.11300     0.00002   
    988    10.57277 49997.12607 49508.69100     0.00002   
    989    10.58145 45645.49777 44664.49600     0.00002   
    990    10.59014 40053.87801 38230.98400     0.00003   
    991    10.59882 34187.27558 31844.14600     0.00003   
    992    10.60751 28749.43116 26436.30100     0.00004   
    993    10.61619 24157.56307 22177.63100     0.00005   
    994    10.62487 20573.09028 19068.67200     0.00005   
    995    10.63356 17965.53901 16739.84800     0.00006   
    996    10.64224 16191.21155 15104.49600     0.00007   
    997    10.65093 15069.34965 14065.09300     0.00007   
    998    10.65961 14430.74981 13452.32000     0.00007   
    999    10.66829 14143.08179 13173.97000     0.00008   
   1000    10.67698 14112.94613 13168.12900     0.00008   
   1001    10.68566 14276.30057 13393.03400     0.00007   
   1002    10.69435 14585.12946 13799.96100     0.00007   
   1003    10.70303 14994.51923 14315.63600     0.00007   
   1004    10.71171 15459.82762 14834.93000     0.00007   
   1005    10.72040 15954.12847 15237.31300     0.00007   
   1006    10.72908 16482.23191 15616.19600     0.00006   
   1007    10.73776 17047.55399 16089.98400     0.00006   
   1008    10.74645 17597.59347 16672.12900     0.00006   
   1009    10.75513 17998.41552 17202.42800     0.00006   
   1010    10.76382 18066.36901 17366.01400     0.00006   
   1011    10.77250 17673.95311 16929.52000     0.00006   
   1012    10.78119 16857.28739 16043.40200     0.00006   
   1013    10.78987 15788.90183 14949.86500     0.00007   
   1014    10.79855 14661.67896 13866.00200     0.00007   
   1015    10.80724 13620.10393 12998.63300     0.00008   
   1016    10.81592 12746.40042 12309.00100     0.00008   
   1017    10.82461 12068.98277 11776.24200     0.00008   
   1018    10.83329 11576.38803 11360.74500     0.00009   
   1019    10.84197 11234.44835 11063.36700     0.00009   
   1020    10.85066 11002.07864 10843.55500     0.00009   
   1021    10.85934 10842.57879 10702.58800     0.00009   
   1022    10.86802 10728.24329 10596.03200     0.00009   
   1023    10.87671 10640.78704 10526.88200     0.00009   
   1024    10.88539 10569.32842 10466.92900     0.00010   
   1025    10.89408 10507.85735 10413.36800     0.00010   
   1026    10.90276 10453.09431 10374.30200     0.00010   
   1027    10.91145 10403.33497 10330.78200     0.00010   
   1028    10.92013 10357.56634 10295.87800     0.00010   
   1029    10.92881 10315.14662 10265.47000     0.00010   
   1030    10.93750 10275.63154 10231.94200     0.00010   
   1031    10.94618 10238.69319 10205.77100     0.00010   
   1032    10.95487 10204.04582 10179.20000     0.00010   
   1033    10.96355 10171.51835 10147.26900     0.00010   
   1034    10.97223 10140.96083 10127.08100     0.00010   
   1035    10.98092 10112.27152 10103.85400     0.00010   
   1036    10.98960 10085.37637 10078.72500     0.00010   
   1037    10.99828 10060.24985 10062.18000     0.00010   
   1038    11.00697 10036.89325 10037.74400     0.00010   
   1039    11.01565 10015.33164 10022.96400     0.00010   
   1040    11.02434  9995.65301 10007.55900     0.00010   
   1041    11.03302  9977.96701  9990.23930     0.00010   
   1042    11.04171  9962.44318  9981.77730     0.00010   
   1043    11.05039  9949.29768  9972.33400     0.00010   
   1044    11.05907  9938.84149  9957.95120     0.00010   
   1045    11.06776  9931.49542  9960.36330     0.00010   
   1046    11.07644  9927.86658  9962.35350     0.00010   
   1047    11.08513  9928.90300  9971.27730     0.00010   
   1048    11.09381  9936.24291  9993.87890     0.00010   
   1049    11.10249  9952.91872 10021.98600     0.00010   
   1050    11.11118  9984.67683 10079.80400     0.00010   
   1051    11.11986 10042.08733 10169.24100     0.00010   
   1052    11.12855 10143.31094 10307.97100     0.00010   
   1053    11.13723 10316.82055 10546.40800     0.00009   
   1054    11.14591 10602.19164 10890.85400     0.00009   
   1055    11.15460 11046.17347 11393.31900     0.00009   
   1056    11.16328 11692.31074 12064.98000     0.00008   
   1057    11.17197 12563.36222 12878.80900     0.00008   
   1058    11.18065 13640.35421 13938.11500     0.00007   
   1059    11.18933 14844.37813 15247.58900     0.00007   
   1060    11.19802 16023.29296 16653.18900     0.00006   
   1061    11.20670 16953.06996 17818.91200     0.00006   
   1062    11.21538 17391.29037 18339.42400     0.00005   
   1063    11.22407 17213.58141 17977.63300     0.00006   
   1064    11.23275 16520.22114 16988.70500     0.00006   
   1065    11.24144 15560.69315 15703.90000     0.00006   
   1066    11.25012 14584.65736 14516.40200     0.00007   
   1067    11.25880 13768.17709 13681.23500     0.00007   
   1068    11.26749 13202.46701 13183.00600     0.00008   
   1069    11.27617 12902.85101 12983.92900     0.00008   
   1070    11.28486 12824.96983 12996.72900     0.00008   
   1071    11.29354 12890.73658 13199.01100     0.00008   
   1072    11.30223 13020.84001 13572.18200     0.00007   
   1073    11.31091 13152.75775 14071.47100     0.00007   
   1074    11.31959 13234.39281 14544.83500     0.00007   
   1075    11.32828 13217.30049 14842.45500     0.00007   
   1076    11.33696 13069.13244 14731.72300     0.00007   
   1077    11.34564 12789.86274 14204.12800     0.00007   
   1078    11.35433 12412.78072 13390.00200     0.00007   
   1079    11.36301 11986.10499 12492.28600     0.00008   
   1080    11.37170 11551.10024 11684.31800     0.00009   
   1081    11.38038 11133.40792 11022.44200     0.00009   
   1082    11.38907 10747.05787 10495.53700     0.00010   
   1083    11.39775 10400.94513 10082.64900     0.00010   
   1084    11.40643 10100.86448  9769.43360     0.00010   
   1085    11.41512  9848.67883  9533.15230     0.00010   
   1086    11.42380  9642.38740  9369.32130     0.00011   
   1087    11.43249  9477.34559  9252.06930     0.00011   
   1088    11.44117  9347.39981  9175.00100     0.00011   
   1089    11.44985  9245.92444  9115.04790     0.00011   
   1090    11.45854  9166.89512  9067.49220     0.00011   
   1091    11.46722  9105.63590  9038.00880     0.00011   
   1092    11.47590  9059.36469  9018.33300     0.00011   
   1093    11.48459  9027.53985  9007.42090     0.00011   
   1094    11.49327  9011.92726  9022.42970     0.00011   
   1095    11.50196  9016.26777  9051.56350     0.00011   
   1096    11.51064  9045.33699  9106.69140     0.00011   
   1097    11.51932  9103.15323  9193.61330     0.00011   
   1098    11.52801  9190.57530  9311.64260     0.00011   
   1099    11.53669  9302.68632  9482.20800     0.00011   
   1100    11.54538  9426.57192  9685.77340     0.00010   
   1101    11.55406  9540.00286  9868.37600     0.00010   
   1102    11.56275  9612.65193  9980.54880     0.00010   
   1103    11.57143  9615.78617  9968.22360     0.00010   
   1104    11.58011  9540.58045  9836.23830     0.00010   
   1105    11.58880  9405.47502  9644.37600     0.00010   
   1106    11.59748  9241.98360  9433.25390     0.00011   
   1107    11.60617  9078.42437  9246.14450     0.00011   
   1108    11.61485  8934.48193  9100.39450     0.00011   
   1109    11.62353  8821.71267  8985.76660     0.00011   
   1110    11.63222  8745.50753  8918.23930     0.00011   
   1111    11.64090  8707.66368  8885.27730     0.00011   
   1112    11.64959  8708.43512  8892.69240     0.00011   
   1113    11.65827  8747.45758  8946.69140     0.00011   
   1114    11.66695  8823.09101  9038.07710     0.00011   
   1115    11.67564  8930.47330  9177.33110     0.00011   
   1116    11.68432  9059.36213  9368.79390     0.00011   
   1117    11.69300  9192.26611  9562.75780     0.00010   
   1118    11.70169  9304.11437  9715.40530     0.00010   
   1119    11.71037  9367.45724  9777.32620     0.00010   
   1120    11.71906  9367.75933  9732.95610     0.00010   
   1121    11.72774  9318.22710  9641.08980     0.00010   
   1122    11.73642  9253.28266  9536.02830     0.00010   
   1123    11.74511  9208.52289  9471.44430     0.00011   
   1124    11.75379  9207.39844  9490.92970     0.00011   
   1125    11.76248  9256.40889  9591.62700     0.00010   
   1126    11.77116  9343.75565  9755.35350     0.00010   
   1127    11.77984  9439.75809  9930.91800     0.00010   
   1128    11.78853  9501.44921 10015.78100     0.00010   
   1129    11.79721  9488.25283  9966.47460     0.00010   
   1130    11.80590  9387.07491  9778.39260     0.00010   
   1131    11.81458  9220.17461  9500.59470     0.00011   
   1132    11.82326  9025.64107  9227.77930     0.00011   
   1133    11.83195  8837.42801  8979.92380     0.00011   
   1134    11.84063  8678.65466  8789.80570     0.00011   
   1135    11.84932  8561.94947  8653.34670     0.00012   
   1136    11.85800  8491.40885  8558.48630     0.00012   
   1137    11.86669  8465.26300  8511.87210     0.00012   
   1138    11.87537  8478.84452  8506.47660     0.00012   
   1139    11.88405  8527.06642  8543.88280     0.00012   
   1140    11.89274  8605.70303  8634.77830     0.00012   
   1141    11.90142  8711.35142  8774.62210     0.00011   
   1142    11.91011  8840.08392  8967.51460     0.00011   
   1143    11.91879  8985.21748  9206.24320     0.00011   
   1144    11.92747  9135.37024  9426.65430     0.00011   
   1145    11.93616  9275.56780  9589.07910     0.00010   
   1146    11.94484  9391.52907  9672.56740     0.00010   
   1147    11.95353  9472.49270  9670.99120     0.00010   
   1148    11.96221  9507.88497  9613.39260     0.00010   
   1149    11.97089  9482.37087  9492.68950     0.00011   
   1150    11.97958  9381.62270  9304.64360     0.00011   
   1151    11.98826  9209.08015  9091.46480     0.00011   
   1152    11.99694  8990.73781  8857.66800     0.00011   
   1153    12.00563  8760.32570  8648.04100     0.00012   
   1154    12.01431  8545.30266  8476.08790     0.00012   
   1155    12.02300  8363.09557  8344.04690     0.00012   
   1156    12.03168  8222.67008  8253.62500     0.00012   
   1157    12.04036  8127.14954  8191.45070     0.00012   
   1158    12.04905  8076.98206  8159.46240     0.00012   
   1159    12.05773  8072.44871  8166.25930     0.00012   
   1160    12.06642  8115.74281  8201.87110     0.00012   
   1161    12.07510  8209.36038  8267.02830     0.00012   
   1162    12.08378  8353.62714  8374.69630     0.00012   
   1163    12.09247  8542.92677  8520.73540     0.00012   
   1164    12.10115  8761.55975  8714.19630     0.00011   
   1165    12.10984  8980.67873  8934.82420     0.00011   
   1166    12.11852  9157.21130  9111.43360     0.00011   
   1167    12.12721  9241.76352  9188.15230     0.00011   
   1168    12.13589  9202.96336  9131.38960     0.00011   
   1169    12.14457  9051.39113  8957.71680     0.00011   
   1170    12.15326  8830.83443  8749.06050     0.00011   
   1171    12.16194  8589.58048  8529.04690     0.00012   
   1172    12.17062  8364.01857  8347.78610     0.00012   
   1173    12.17931  8176.00424  8209.34380     0.00012   
   1174    12.18799  8035.29204  8105.20460     0.00012   
   1175    12.19668  7943.18430  8039.11130     0.00012   
   1176    12.20536  7897.28188  8005.23490     0.00012   
   1177    12.21405  7896.29411  8009.69340     0.00012   
   1178    12.22273  7944.05609  8065.82710     0.00012   
   1179    12.23141  8051.79115  8175.53660     0.00012   
   1180    12.24010  8237.70105  8361.46680     0.00012   
   1181    12.24878  8523.25430  8636.78710     0.00012   
   1182    12.25746  8925.68027  9002.02250     0.00011   
   1183    12.26615  9448.07066  9502.35940     0.00011   
   1184    12.27483 10068.63324 10170.50600     0.00010   
   1185    12.28352 10732.13031 10967.76200     0.00009   
   1186    12.29220 11343.80669 11735.92900     0.00009   
   1187    12.30088 11776.06764 12282.37800     0.00008   
   1188    12.30957 11911.53230 12398.81500     0.00008   
   1189    12.31825 11721.04857 12122.59400     0.00008   
   1190    12.32694 11292.27288 11534.73600     0.00009   
   1191    12.33562 10771.20945 10899.02100     0.00009   
   1192    12.34430 10298.60957 10382.06000     0.00010   
   1193    12.35299  9987.31059 10091.51000     0.00010   
   1194    12.36167  9921.63617 10075.20100     0.00010   
   1195    12.37036 10158.15028 10308.72700     0.00010   
   1196    12.37904 10722.44044 10795.89000     0.00009   
   1197    12.38773 11601.48134 11550.69800     0.00009   
   1198    12.39641 12734.30821 12618.94700     0.00008   
   1199    12.40509 14004.95991 13877.67600     0.00007   
   1200    12.41378 15231.83747 15096.24700     0.00007   
   1201    12.42246 16164.63514 15877.30300     0.00006   
   1202    12.43115 16538.11026 15930.87200     0.00006   
   1203    12.43983 16220.55943 15284.72900     0.00007   
   1204    12.44851 15322.12152 14140.88200     0.00007   
   1205    12.45720 14109.75102 12938.48600     0.00008   
   1206    12.46588 12849.98945 11831.10000     0.00008   
   1207    12.47457 11733.62062 10959.20800     0.00009   
   1208    12.48325 10868.49313 10327.14800     0.00010   
   1209    12.49193 10287.28907  9920.51660     0.00010   
   1210    12.50062  9960.71248  9710.23930     0.00010   
   1211    12.50930  9814.13721  9628.68460     0.00010   
   1212    12.51798  9747.32335  9583.01370     0.00010   
   1213    12.52667  9660.93087  9476.63090     0.00011   
   1214    12.53535  9494.43335  9255.07030     0.00011   
   1215    12.54404  9247.89682  8957.34960     0.00011   
   1216    12.55272  8961.28370  8659.45700     0.00012   
   1217    12.56140  8680.02231  8386.95610     0.00012   
   1218    12.57009  8438.86396  8179.00100     0.00012   
   1219    12.57877  8259.58116  8031.93020     0.00012   
   1220    12.58746  8153.19935  7933.40970     0.00013   
   1221    12.59614  8124.07022  7886.03220     0.00013   
   1222    12.60482  8173.52888  7884.04690     0.00013   
   1223    12.61351  8303.98214  7935.75240     0.00013   
   1224    12.62219  8520.56412  8056.75880     0.00012   
   1225    12.63088  8830.87309  8248.94140     0.00012   
   1226    12.63956  9242.33159  8533.62300     0.00012   
   1227    12.64824  9758.70872  8929.30570     0.00011   
   1228    12.65693 10375.21779  9455.92190     0.00011   
   1229    12.66561 11073.31297 10161.60600     0.00010   
   1230    12.67430 11812.91746 11090.63700     0.00009   
   1231    12.68298 12524.50432 12115.65600     0.00008   
   1232    12.69167 13106.21253 12972.54000     0.00008   
   1233    12.70035 13444.15614 13432.91100     0.00007   
   1234    12.70903 13462.76633 13312.36800     0.00008   
   1235    12.71772 13173.80413 12760.52700     0.00008   
   1236    12.72640 12672.12143 11900.06000     0.00008   
   1237    12.73509 12084.00905 11069.70700     0.00009   
   1238    12.74377 11521.84907 10413.39100     0.00010   
   1239    12.75245 11068.73794  9996.11910     0.00010   
   1240    12.76114 10782.04590  9839.38670     0.00010   
   1241    12.76982 10699.87143  9918.25880     0.00010   
   1242    12.77850 10847.15175 10280.80500     0.00010   
   1243    12.78719 11242.32955 10948.44600     0.00009   
   1244    12.79587 11905.86809 11950.02500     0.00008   
   1245    12.80456 12870.08803 13200.03000     0.00008   
   1246    12.81324 14191.40376 14644.27300     0.00007   
   1247    12.82192 15969.29948 16281.78800     0.00006   
   1248    12.83061 18348.37575 18304.26400     0.00005   
   1249    12.83929 21464.94811 20988.08200     0.00005   
   1250    12.84798 25338.37517 24759.93800     0.00004   
   1251    12.85666 29767.11998 29625.53300     0.00003   
   1252    12.86534 34255.97337 35112.98000     0.00003   
   1253    12.87403 37996.62057 39191.47700     0.00003   
   1254    12.88271 39992.96637 40531.17200     0.00002   
   1255    12.89140 39518.58851 38579.68000     0.00003   
   1256    12.90008 36651.35671 34349.23800     0.00003   
   1257    12.90877 32207.21426 28999.39100     0.00003   
   1258    12.91745 27173.58330 23686.46300     0.00004   
   1259    12.92613 22318.03958 19327.11900     0.00005   
   1260    12.93482 18112.39013 15883.22800     0.00006   
   1261    12.94350 14766.43352 13263.77200     0.00008   
   1262    12.95219 12290.60665 11270.54400     0.00009   
   1263    12.96087 10568.15222  9844.78910     0.00010   
   1264    12.96955  9425.32477  8893.00490     0.00011   
   1265    12.97824  8688.42298  8268.99900     0.00012   
   1266    12.98692  8215.86781  7900.55520     0.00013   
   1267    12.99560  7907.07145  7677.91060     0.00013   
   1268    13.00429  7698.27211  7523.83250     0.00013   
   1269    13.01297  7552.16388  7424.89550     0.00013   
   1270    13.02166  7447.75693  7366.68260     0.00014   
   1271    13.03034  7372.45460  7337.57620     0.00014   
   1272    13.03902  7317.06869  7333.52200     0.00014   
   1273    13.04771  7272.89402  7340.83300     0.00014   
   1274    13.05639  7230.69327  7335.80320     0.00014   
   1275    13.06508  7182.15141  7313.84720     0.00014   
   1276    13.07376  7124.09447  7267.40820     0.00014   
   1277    13.08244  7061.01214  7209.18990     0.00014   
   1278    13.09113  7002.37481  7165.11910     0.00014   
   1279    13.09981  6958.36400  7135.90630     0.00014   
   1280    13.10850  6937.63585  7136.92240     0.00014   
   1281    13.11718  6946.14680  7175.47460     0.00014   
   1282    13.12586  6985.93917  7246.19430     0.00014   
   1283    13.13455  7053.82491  7362.05710     0.00014   
   1284    13.14323  7140.21050  7525.00540     0.00013   
   1285    13.15192  7228.26804  7703.18600     0.00013   
   1286    13.16060  7294.10241  7852.01460     0.00013   
   1287    13.16929  7311.93677  7912.56010     0.00013   
   1288    13.17797  7267.29275  7855.37700     0.00013   
   1289    13.18665  7167.58796  7711.75240     0.00013   
   1290    13.19534  7035.69190  7504.81050     0.00013   
   1291    13.20402  6895.48571  7309.99560     0.00014   
   1292    13.21271  6764.48615  7138.31490     0.00014   
   1293    13.22139  6652.95229  6995.28370     0.00014   
   1294    13.23007  6565.19583  6890.57570     0.00015   
   1295    13.23876  6501.20677  6807.77590     0.00015   
   1296    13.24744  6458.73854  6751.19290     0.00015   
   1297    13.25612  6435.12774  6718.35160     0.00015   
   1298    13.26481  6428.74605  6701.25000     0.00015   
   1299    13.27349  6439.70574  6706.80620     0.00015   
   1300    13.28218  6469.84351  6727.75100     0.00015   
   1301    13.29086  6522.18229  6764.25240     0.00015   
   1302    13.29954  6600.05094  6828.82280     0.00015   
   1303    13.30823  6706.16141  6925.01270     0.00014   
   1304    13.31691  6841.61433  7060.12990     0.00014   
   1305    13.32560  7004.55109  7237.82710     0.00014   
   1306    13.33428  7189.19677  7447.66550     0.00013   
   1307    13.34296  7387.53042  7689.24410     0.00013   
   1308    13.35165  7594.02271  7976.44430     0.00013   
   1309    13.36033  7806.80804  8307.40920     0.00012   
   1310    13.36902  8019.10456  8653.10060     0.00012   
   1311    13.37770  8207.91809  8944.38280     0.00011   
   1312    13.38638  8332.53395  9075.75980     0.00011   
   1313    13.39507  8348.47038  9008.57230     0.00011   
   1314    13.40375  8231.26501  8737.87890     0.00011   
   1315    13.41244  7994.08273  8369.70410     0.00012   
   1316    13.42112  7682.46765  7976.79690     0.00013   
   1317    13.42981  7349.84499  7604.27150     0.00013   
   1318    13.43849  7037.60534  7301.08060     0.00014   
   1319    13.44717  6770.11973  7052.90190     0.00014   
   1320    13.45586  6557.17186  6860.41990     0.00015   
   1321    13.46454  6397.63981  6717.13040     0.00015   
   1322    13.47322  6283.63680  6604.22310     0.00015   
   1323    13.48191  6204.46616  6526.25100     0.00015   
   1324    13.49059  6149.63778  6468.97270     0.00015   
   1325    13.49928  6110.70554  6423.77540     0.00016   
   1326    13.50796  6081.78249  6392.97900     0.00016   
   1327    13.51664  6059.12749  6366.55320     0.00016   
   1328    13.52533  6040.52110  6339.96140     0.00016   
   1329    13.53401  6024.71928  6323.90920     0.00016   
   1330    13.54270  6011.07230  6306.58840     0.00016   
   1331    13.55138  5999.29130  6295.89160     0.00016   
   1332    13.56006  5989.35521  6290.10790     0.00016   
   1333    13.56875  5981.51174  6284.28520     0.00016   
   1334    13.57743  5976.36494  6288.55470     0.00016   
   1335    13.58612  5975.00658  6295.99320     0.00016   
   1336    13.59480  5979.10479  6311.07280     0.00016   
   1337    13.60348  5990.83570  6343.03420     0.00016   
   1338    13.61217  6012.75627  6387.34620     0.00016   
   1339    13.62085  6046.92067  6450.90530     0.00016   
   1340    13.62954  6094.16940  6538.78910     0.00015   
   1341    13.63822  6153.03449  6653.67580     0.00015   
   1342    13.64690  6218.77844  6789.82280     0.00015   
   1343    13.65559  6282.68287  6927.45170     0.00014   
   1344    13.66427  6331.98919  7020.69580     0.00014   
   1345    13.67296  6352.29702  7041.61520     0.00014   
   1346    13.68164  6335.37855  6975.45310     0.00014   
   1347    13.69033  6285.42591  6852.72220     0.00015   
   1348    13.69901  6215.67449  6718.24850     0.00015   
   1349    13.70769  6140.06161  6583.53420     0.00015   
   1350    13.71638  6068.80747  6475.60740     0.00015   
   1351    13.72506  6007.84980  6387.10400     0.00016   
   1352    13.73375  5959.53940  6311.58150     0.00016   
   1353    13.74243  5923.64168  6255.91460     0.00016   
   1354    13.75111  5898.42394  6206.25100     0.00016   
   1355    13.75980  5881.67545  6169.72220     0.00016   
   1356    13.76848  5871.40567  6145.47120     0.00016   
   1357    13.77716  5866.13833  6124.52150     0.00016   
   1358    13.78585  5865.23671  6114.34130     0.00016   
   1359    13.79453  5868.84273  6107.73580     0.00016   
   1360    13.80322  5878.22354  6105.48970     0.00016   
   1361    13.81190  5896.16897  6117.50390     0.00016   
   1362    13.82058  5927.58440  6142.82910     0.00016   
   1363    13.82927  5980.06989  6195.52880     0.00016   
   1364    13.83795  6064.08585  6285.74610     0.00016   
   1365    13.84664  6192.04446  6417.57760     0.00016   
   1366    13.85532  6376.04218  6607.01170     0.00015   
   1367    13.86400  6623.99608  6861.12890     0.00015   
   1368    13.87269  6934.64982  7211.73240     0.00014   
   1369    13.88137  7292.72093  7655.73340     0.00013   
   1370    13.89006  7664.52097  8174.82420     0.00012   
   1371    13.89874  7994.81985  8608.66020     0.00012   
   1372    13.90742  8212.22620  8827.28910     0.00011   
   1373    13.91611  8256.13879  8754.07420     0.00011   
   1374    13.92479  8117.34379  8454.98440     0.00012   
   1375    13.93348  7845.23208  8029.10990     0.00012   
   1376    13.94216  7510.58383  7565.55760     0.00013   
   1377    13.95084  7171.55769  7179.23540     0.00014   
   1378    13.95953  6864.04211  6851.64700     0.00015   
   1379    13.96821  6605.66179  6599.05130     0.00015   
   1380    13.97690  6402.83465  6410.82080     0.00016   
   1381    13.98558  6255.28386  6270.97710     0.00016   
   1382    13.99427  6158.18096  6189.92770     0.00016   
   1383    14.00295  6104.25527  6147.24760     0.00016   
   1384    14.01163  6085.94557  6136.95510     0.00016   
   1385    14.02032  6096.75783  6153.31880     0.00016   
   1386    14.02900  6131.57413  6179.36770     0.00016   
   1387    14.03768  6186.73333  6209.75000     0.00016   
   1388    14.04637  6261.19958  6243.62210     0.00016   
   1389    14.05505  6358.78043  6281.78470     0.00016   
   1390    14.06374  6488.29229  6347.85160     0.00016   
   1391    14.07242  6659.57722  6449.65970     0.00016   
   1392    14.08110  6877.84433  6593.32620     0.00015   
   1393    14.08979  7139.18244  6782.79830     0.00015   
   1394    14.09847  7429.15478  7020.24120     0.00014   
   1395    14.10716  7726.39017  7298.99850     0.00014   
   1396    14.11584  8007.25357  7588.28080     0.00013   
   1397    14.12452  8243.70806  7853.26270     0.00013   
   1398    14.13321  8402.03433  8018.08250     0.00012   
   1399    14.14189  8458.01874  8063.00980     0.00012   
   1400    14.15058  8421.13891  7997.17430     0.00013   
   1401    14.15926  8339.21625  7909.36280     0.00013   
   1402    14.16794  8274.04652  7851.23000     0.00013   
   1403    14.17663  8272.80759  7895.92720     0.00013   
   1404    14.18531  8355.86388  8075.12110     0.00012   
   1405    14.19400  8516.66007  8368.61230     0.00012   
   1406    14.20268  8726.16787  8683.32620     0.00012   
   1407    14.21137  8945.56044  8939.31150     0.00011   
   1408    14.22005  9156.03219  9118.20020     0.00011   
   1409    14.22873  9383.62994  9289.22850     0.00011   
   1410    14.23742  9681.48759  9551.06150     0.00010   
   1411    14.24610 10086.00082  9992.29980     0.00010   
   1412    14.25479 10586.12436 10598.10700     0.00009   
   1413    14.26347 11111.73453 11286.25200     0.00009   
   1414    14.27215 11541.34974 11794.23100     0.00008   
   1415    14.28084 11742.35214 11962.13400     0.00008   
   1416    14.28952 11633.93041 11701.84600     0.00009   
   1417    14.29820 11223.66020 11140.18400     0.00009   
   1418    14.30689 10597.71128 10373.28500     0.00010   
   1419    14.31557  9881.71372  9603.47170     0.00010   
   1420    14.32426  9191.32820  8966.77440     0.00011   
   1421    14.33294  8600.48764  8471.03220     0.00012   
   1422    14.34162  8136.18919  8134.04390     0.00012   
   1423    14.35031  7785.65727  7890.95120     0.00013   
   1424    14.35899  7511.90920  7700.86520     0.00013   
   1425    14.36768  7277.95198  7535.45900     0.00013   
   1426    14.37636  7067.19452  7363.63090     0.00014   
   1427    14.38504  6884.27109  7204.94920     0.00014   
   1428    14.39373  6744.61066  7077.76070     0.00014   
   1429    14.40241  6667.19742  6986.45070     0.00014   
   1430    14.41110  6670.11768  6967.37350     0.00014   
   1431    14.41978  6765.56420  7021.06640     0.00014   
   1432    14.42846  6954.95451  7173.89160     0.00014   
   1433    14.43715  7225.03746  7435.31880     0.00013   
   1434    14.44583  7544.53962  7796.90380     0.00013   
   1435    14.45452  7861.55606  8157.94340     0.00012   
   1436    14.46320  8105.46017  8390.99800     0.00012   
   1437    14.47189  8203.32567  8408.41800     0.00012   
   1438    14.48057  8119.66234  8215.64550     0.00012   
   1439    14.48925  7882.43683  7883.58060     0.00013   
   1440    14.49794  7560.97205  7491.52490     0.00013   
   1441    14.50662  7225.64625  7155.96290     0.00014   
   1442    14.51531  6928.36934  6881.68120     0.00015   
   1443    14.52399  6700.53177  6691.40040     0.00015   
   1444    14.53267  6554.65193  6583.23880     0.00015   
   1445    14.54136  6486.92327  6559.37890     0.00015   
   1446    14.55004  6480.56872  6611.28320     0.00015   
   1447    14.55872  6509.64930  6696.16750     0.00015   
   1448    14.56741  6544.41744  6763.84770     0.00015   
   1449    14.57609  6559.91432  6773.66500     0.00015   
   1450    14.58478  6545.30698  6703.58540     0.00015   
   1451    14.59346  6507.25420  6584.02780     0.00015   
   1452    14.60214  6463.71975  6461.15040     0.00015   
   1453    14.61083  6434.56925  6361.46140     0.00016   
   1454    14.61951  6435.35829  6319.34720     0.00016   
   1455    14.62820  6475.72033  6330.38570     0.00016   
   1456    14.63688  6559.48454  6403.70560     0.00016   
   1457    14.64556  6686.30519  6548.22460     0.00015   
   1458    14.65425  6850.55457  6768.76510     0.00015   
   1459    14.66293  7042.15594  7048.82570     0.00014   
   1460    14.67162  7246.37811  7317.07760     0.00014   
   1461    14.68030  7445.85033  7509.11910     0.00013   
   1462    14.68898  7626.60551  7585.16600     0.00013   
   1463    14.69767  7785.19344  7558.03860     0.00013   
   1464    14.70635  7930.00141  7472.50000     0.00013   
   1465    14.71504  8073.96957  7396.15480     0.00014   
   1466    14.72372  8224.49254  7346.35350     0.00014   
   1467    14.73241  8379.57606  7338.96190     0.00014   
   1468    14.74109  8534.83248  7379.77590     0.00014   
   1469    14.74977  8693.70313  7487.57470     0.00013   
   1470    14.75846  8865.83729  7712.81590     0.00013   
   1471    14.76714  9054.73062  8055.78610     0.00012   
   1472    14.77582  9249.41329  8480.57030     0.00012   
   1473    14.78451  9426.41053  8861.03710     0.00011   
   1474    14.79319  9559.41592  9133.52250     0.00011   
   1475    14.80188  9629.39002  9279.77640     0.00011   
   1476    14.81056  9626.94972  9339.58500     0.00011   
   1477    14.81924  9546.45467  9311.11820     0.00011   
   1478    14.82793  9381.29495  9175.56930     0.00011   
   1479    14.83661  9129.09986  8880.34670     0.00011   
   1480    14.84530  8801.15829  8440.32910     0.00012   
   1481    14.85398  8423.74306  7937.98050     0.00013   
   1482    14.86266  8030.10150  7421.77540     0.00013   
   1483    14.87135  7651.16764  6966.95950     0.00014   
   1484    14.88003  7310.43568  6597.57910     0.00015   
   1485    14.88872  7022.30980  6309.15720     0.00016   
   1486    14.89740  6792.16778  6114.06400     0.00016   
   1487    14.90608  6617.59525  5978.94680     0.00017   
   1488    14.91477  6489.57628  5906.38530     0.00017   
   1489    14.92345  6393.31151  5869.09960     0.00017   
   1490    14.93214  6310.35057  5839.83350     0.00017   
   1491    14.94082  6223.95719  5807.87650     0.00017   
   1492    14.94950  6126.19862  5762.42820     0.00017   
   1493    14.95819  6020.55865  5703.57710     0.00018   
   1494    14.96687  5917.66897  5650.98730     0.00018   
   1495    14.97556  5829.46548  5605.17580     0.00018   
   1496    14.98424  5766.51850  5578.43950     0.00018   
   1497    14.99293  5737.72776  5576.15480     0.00018   
   1498    15.00161  5750.20435  5593.31640     0.00018   
   1499    15.01029  5808.64248  5641.50290     0.00018   
   1500    15.01898  5913.95930  5722.84960     0.00017   
   1501    15.02766  6061.49944  5848.47510     0.00017   
   1502    15.03635  6239.09380  6020.67480     0.00017   
   1503    15.04503  6424.95275  6222.06450     0.00016   
   1504    15.05371  6586.38865  6396.39940     0.00016   
   1505    15.06240  6683.53015  6482.92580     0.00015   
   1506    15.07108  6685.46257  6451.96040     0.00015   
   1507    15.07976  6591.17018  6331.46290     0.00016   
   1508    15.08845  6430.92389  6158.30620     0.00016   
   1509    15.09713  6245.51508  5975.70410     0.00017   
   1510    15.10582  6068.81147  5833.46730     0.00017   
   1511    15.11450  5923.01618  5725.24270     0.00017   
   1512    15.12318  5819.77231  5665.21780     0.00018   
   1513    15.13187  5762.17812  5647.42090     0.00018   
   1514    15.14055  5746.74046  5668.21290     0.00018   
   1515    15.14924  5765.47863  5733.63960     0.00017   
   1516    15.15792  5807.34669  5838.01900     0.00017   
   1517    15.16660  5859.13263  5973.26270     0.00017   
   1518    15.17529  5906.60916  6105.72560     0.00016   
   1519    15.18397  5937.63642  6202.73190     0.00016   
   1520    15.19266  5947.03721  6244.48730     0.00016   
   1521    15.20134  5939.70592  6235.15870     0.00016   
   1522    15.21002  5928.76221  6196.32030     0.00016   
   1523    15.21871  5930.46167  6177.07080     0.00016   
   1524    15.22739  5959.51827  6200.66310     0.00016   
   1525    15.23608  6026.20742  6290.14110     0.00016   
   1526    15.24476  6134.87607  6444.91500     0.00016   
   1527    15.25344  6282.95505  6652.92870     0.00015   
   1528    15.26213  6460.79869  6873.94730     0.00015   
   1529    15.27081  6653.68634  7067.20650     0.00014   
   1530    15.27950  6846.10281  7196.51610     0.00014   
   1531    15.28818  7026.62423  7260.17770     0.00014   
   1532    15.29687  7191.96244  7269.51760     0.00014   
   1533    15.30555  7345.40197  7275.46340     0.00014   
   1534    15.31423  7487.16558  7322.21580     0.00014   
   1535    15.32292  7605.37509  7411.52150     0.00013   
   1536    15.33160  7671.56810  7496.98540     0.00013   
   1537    15.34028  7644.24333  7487.37300     0.00013   
   1538    15.34897  7491.92396  7334.90230     0.00014   
   1539    15.35765  7222.77650  7068.47950     0.00014   
   1540    15.36634  6882.65470  6729.07180     0.00015   
   1541    15.37502  6525.42912  6399.00050     0.00016   
   1542    15.38370  6192.16289  6114.27200     0.00016   
   1543    15.39239  5907.17260  5879.11670     0.00017   
   1544    15.40107  5680.95355  5707.10890     0.00018   
   1545    15.40976  5513.94998  5580.37450     0.00018   
   1546    15.41844  5400.11586  5498.47850     0.00018   
   1547    15.42712  5330.66224  5460.21290     0.00018   
   1548    15.43581  5297.30913  5452.91310     0.00018   
   1549    15.44449  5294.53989  5482.52830     0.00018   
   1550    15.45318  5320.99111  5545.64990     0.00018   
   1551    15.46186  5379.95062  5651.25240     0.00018   
   1552    15.47054  5478.49099  5807.97950     0.00017   
   1553    15.47923  5624.70882  6024.12700     0.00017   
   1554    15.48791  5823.68698  6314.13480     0.00016   
   1555    15.49660  6073.29118  6697.83590     0.00015   
   1556    15.50528  6360.34096  7210.70800     0.00014   
   1557    15.51396  6657.15048  7799.90920     0.00013   
   1558    15.52265  6919.19352  8337.88670     0.00012   
   1559    15.53133  7089.62198  8662.93360     0.00012   
   1560    15.54002  7121.08766  8658.06640     0.00012   
   1561    15.54870  7007.38313  8338.27930     0.00012   
   1562    15.55738  6789.57168  7829.93360     0.00013   
   1563    15.56607  6528.58766  7288.01810     0.00014   
   1564    15.57475  6277.95740  6785.52340     0.00015   
   1565    15.58344  6074.22266  6398.65970     0.00016   
   1566    15.59212  5936.97027  6115.96290     0.00016   
   1567    15.60080  5870.12927  5930.88620     0.00017   
   1568    15.60949  5865.18823  5842.07670     0.00017   
   1569    15.61817  5903.71012  5809.15670     0.00017   
   1570    15.62686  5960.57466  5806.42290     0.00017   
   1571    15.63554  6010.53022  5790.88180     0.00017   
   1572    15.64422  6039.96170  5743.86520     0.00017   
   1573    15.65291  6054.76679  5681.10790     0.00018   
   1574    15.66159  6073.03256  5612.07280     0.00018   
   1575    15.67028  6110.23808  5560.25100     0.00018   
   1576    15.67896  6169.93532  5534.47410     0.00018   
   1577    15.68764  6240.97812  5525.84770     0.00018   
   1578    15.69633  6297.30301  5521.73290     0.00018   
   1579    15.70501  6305.11721  5499.51370     0.00018   
   1580    15.71370  6240.82699  5449.96140     0.00018   
   1581    15.72238  6108.04627  5388.66550     0.00019   
   1582    15.73106  5933.25449  5320.64600     0.00019   
   1583    15.73975  5747.38284  5262.66750     0.00019   
   1584    15.74843  5574.10868  5216.28320     0.00019   
   1585    15.75712  5427.74160  5179.60790     0.00019   
   1586    15.76580  5314.49094  5159.85450     0.00019   
   1587    15.77448  5234.18511  5150.41990     0.00019   
   1588    15.78317  5182.13335  5147.59720     0.00019   
   1589    15.79185  5151.15817  5149.92970     0.00019   
   1590    15.80054  5133.89559  5148.16160     0.00019   
   1591    15.80922  5125.22483  5147.60060     0.00019   
   1592    15.81790  5123.53784  5146.57860     0.00019   
   1593    15.82659  5129.87074  5147.10600     0.00019   
   1594    15.83527  5146.24849  5158.89890     0.00019   
   1595    15.84396  5174.79057  5178.50290     0.00019   
   1596    15.85264  5217.39737  5211.02000     0.00019   
   1597    15.86132  5276.64833  5253.55030     0.00019   
   1598    15.87001  5356.19675  5304.04690     0.00019   
   1599    15.87869  5460.67468  5361.21880     0.00019   
   1600    15.88738  5600.20994  5423.94780     0.00018   
   1601    15.89606  5788.90268  5499.30860     0.00018   
   1602    15.90474  6043.31003  5606.38870     0.00018   
   1603    15.91343  6376.74185  5767.93120     0.00017   
   1604    15.92211  6794.09270  6008.14360     0.00017   
   1605    15.93080  7286.91185  6331.52340     0.00016   
   1606    15.93948  7827.88414  6734.20260     0.00015   
   1607    15.94816  8368.89260  7178.41020     0.00014   
   1608    15.95685  8854.28895  7676.95170     0.00013   
   1609    15.96553  9249.24637  8243.94730     0.00012   
   1610    15.97422  9549.46406  8883.16500     0.00011   
   1611    15.98290  9752.37599  9520.29690     0.00011   
   1612    15.99158  9827.98685  9982.18260     0.00010   
   1613    16.00027  9732.59293 10131.49500     0.00010   
   1614    16.00895  9460.14051  9931.47460     0.00010   
   1615    16.01763  9069.15394  9492.78710     0.00011   
   1616    16.02632  8649.48866  8952.29880     0.00011   
   1617    16.03500  8274.84665  8494.94240     0.00012   
   1618    16.04369  7983.51866  8192.06050     0.00012   
   1619    16.05237  7781.05627  8021.00930     0.00012   
   1620    16.06106  7652.10185  7949.60160     0.00013   
   1621    16.06974  7577.35733  7911.84670     0.00013   
   1622    16.07842  7544.40479  7859.73440     0.00013   
   1623    16.08711  7545.71524  7775.88820     0.00013   
   1624    16.09579  7573.65117  7655.69870     0.00013   
   1625    16.10448  7617.14616  7536.33350     0.00013   
   1626    16.11316  7656.63821  7429.60840     0.00013   
   1627    16.12184  7663.49650  7328.66700     0.00014   
   1628    16.13053  7614.25784  7225.05080     0.00014   
   1629    16.13921  7509.36865  7100.39940     0.00014   
   1630    16.14790  7371.12107  6979.28270     0.00014   
   1631    16.15658  7225.20755  6908.52490     0.00014   
   1632    16.16526  7088.14838  6905.92140     0.00014   
   1633    16.17395  6961.31322  6962.67330     0.00014   
   1634    16.18263  6828.38133  7009.36130     0.00014   
   1635    16.19132  6663.79749  6973.22020     0.00014   
   1636    16.20000  6453.47486  6824.12890     0.00015   
   1637    16.20868  6207.73588  6562.01950     0.00015   
   1638    16.21737  5951.97815  6252.30130     0.00016   
   1639    16.22605  5710.11840  5951.70020     0.00017   
   1640    16.23474  5498.06041  5692.41800     0.00018   
   1641    16.24342  5323.82340  5491.66460     0.00018   
   1642    16.25210  5189.66572  5341.80130     0.00019   
   1643    16.26079  5093.86508  5233.04590     0.00019   
   1644    16.26947  5032.62628  5169.58690     0.00019   
   1645    16.27816  5001.69942  5138.39450     0.00019   
   1646    16.28684  4997.50652  5140.85940     0.00019   
   1647    16.29553  5017.51760  5172.84420     0.00019   
   1648    16.30421  5059.86296  5227.35600     0.00019   
   1649    16.31289  5122.47564  5309.11910     0.00019   
   1650    16.32157  5202.11736  5416.17380     0.00018   
   1651    16.33026  5293.80166  5555.18650     0.00018   
   1652    16.33894  5390.14702  5714.28520     0.00018   
   1653    16.34763  5480.95901  5870.59720     0.00017   
   1654    16.35631  5554.93512  5993.73290     0.00017   
   1655    16.36500  5606.00255  6054.09910     0.00017   
   1656    16.37368  5638.42234  6060.04000     0.00017   
   1657    16.38236  5662.63733  6045.56740     0.00017   
   1658    16.39105  5685.87477  6037.70510     0.00017   
   1659    16.39973  5706.41005  6051.07520     0.00017   
   1660    16.40842  5713.82277  6049.87400     0.00017   
   1661    16.41710  5695.65825  6002.99850     0.00017   
   1662    16.42578  5648.60051  5905.10940     0.00017   
   1663    16.43447  5584.48711  5776.70310     0.00017   
   1664    16.44315  5525.06882  5655.18310     0.00018   
   1665    16.45184  5493.06990  5572.52980     0.00018   
   1666    16.46052  5507.70505  5542.67920     0.00018   
   1667    16.46920  5583.55453  5576.73050     0.00018   
   1668    16.47789  5729.79890  5677.47070     0.00018   
   1669    16.48657  5948.71853  5845.04880     0.00017   
   1670    16.49526  6233.62345  6081.50980     0.00016   
   1671    16.50394  6566.99906  6371.29640     0.00016   
   1672    16.51263  6920.55794  6687.27640     0.00015   
   1673    16.52131  7259.69526  6983.03520     0.00014   
   1674    16.52999  7550.61880  7221.61230     0.00014   
   1675    16.53868  7768.94781  7383.30320     0.00014   
   1676    16.54736  7905.46906  7434.80620     0.00013   
   1677    16.55604  7967.46055  7375.33300     0.00014   
   1678    16.56473  7973.59407  7212.32810     0.00014   
   1679    16.57341  7943.91484  6979.58060     0.00014   
   1680    16.58210  7889.38329  6729.67630     0.00015   
   1681    16.59078  7804.13780  6488.67870     0.00015   
   1682    16.59946  7665.88122  6268.19530     0.00016   
   1683    16.60815  7456.38435  6079.66460     0.00016   
   1684    16.61683  7188.95008  5920.06740     0.00017   
   1685    16.62552  6908.06721  5809.42870     0.00017   
   1686    16.63420  6667.60957  5766.36040     0.00017   
   1687    16.64288  6507.81509  5807.02200     0.00017   
   1688    16.65157  6452.95591  5944.35350     0.00017   
   1689    16.66025  6510.30049  6184.69430     0.00016   
   1690    16.66894  6669.55726  6529.67720     0.00015   
   1691    16.67762  6901.70236  6958.06740     0.00014   
   1692    16.68630  7159.95748  7422.52290     0.00013   
   1693    16.69499  7388.52963  7860.75490     0.00013   
   1694    16.70367  7538.83497  8193.07710     0.00012   
   1695    16.71236  7579.66982  8349.19340     0.00012   
   1696    16.72104  7497.30842  8293.38870     0.00012   
   1697    16.72972  7300.16256  8012.44190     0.00012   
   1698    16.73841  7024.53765  7597.28560     0.00013   
   1699    16.74709  6724.53781  7130.55030     0.00014   
   1700    16.75578  6452.44292  6729.10990     0.00015   
   1701    16.76446  6244.88013  6444.48190     0.00016   
   1702    16.77314  6120.00199  6313.31640     0.00016   
   1703    16.78183  6079.44913  6328.77640     0.00016   
   1704    16.79051  6111.38750  6491.31590     0.00015   
   1705    16.79920  6193.21588  6731.61910     0.00015   
   1706    16.80788  6296.01739  6965.89750     0.00014   
   1707    16.81657  6395.51200  7087.17240     0.00014   
   1708    16.82525  6487.99471  7081.41650     0.00014   
   1709    16.83393  6594.93552  6999.71730     0.00014   
   1710    16.84261  6747.22241  6962.27490     0.00014   
   1711    16.85130  6965.39316  7055.22020     0.00014   
   1712    16.85998  7248.34385  7336.11380     0.00014   
   1713    16.86867  7568.80634  7769.10840     0.00013   
   1714    16.87735  7871.32439  8271.23830     0.00012   
   1715    16.88604  8080.19375  8622.40720     0.00012   
   1716    16.89472  8130.71399  8673.81250     0.00012   
   1717    16.90340  8013.85749  8386.59280     0.00012   
   1718    16.91209  7784.43783  7890.81790     0.00013   
   1719    16.92077  7526.37031  7358.56100     0.00014   
   1720    16.92946  7306.74177  6923.69530     0.00014   
   1721    16.93814  7164.61740  6630.43850     0.00015   
   1722    16.94682  7109.02893  6498.33690     0.00015   
   1723    16.95551  7121.94356  6478.56490     0.00015   
   1724    16.96419  7166.62473  6516.76660     0.00015   
   1725    16.97288  7203.17530  6548.03270     0.00015   
   1726    16.98156  7205.05768  6519.75630     0.00015   
   1727    16.99024  7163.84579  6450.97120     0.00016   
   1728    16.99893  7077.14626  6356.22800     0.00016   
   1729    17.00761  6935.48411  6245.99900     0.00016   
   1730    17.01630  6727.65795  6097.66650     0.00016   
   1731    17.02498  6459.46403  5899.23680     0.00017   
   1732    17.03366  6158.58532  5672.00150     0.00018   
   1733    17.04235  5859.42375  5449.72750     0.00018   
   1734    17.05103  5588.49318  5259.09130     0.00019   
   1735    17.05972  5360.68483  5115.97750     0.00020   
   1736    17.06840  5182.08674  5010.61670     0.00020   
   1737    17.07708  5052.78745  4940.71970     0.00020   
   1738    17.08577  4969.50601  4906.24850     0.00020   
   1739    17.09445  4927.54655  4899.96680     0.00020   
   1740    17.10314  4922.38864  4926.02250     0.00020   
   1741    17.11182  4950.59948  4980.97220     0.00020   
   1742    17.12050  5009.80828  5067.90530     0.00020   
   1743    17.12919  5098.13111  5189.22710     0.00019   
   1744    17.13787  5212.88023  5342.89010     0.00019   
   1745    17.14656  5349.04776  5524.35890     0.00018   
   1746    17.15524  5497.80543  5704.46140     0.00018   
   1747    17.16392  5646.33524  5851.55420     0.00017   
   1748    17.17261  5779.25860  5940.67870     0.00017   
   1749    17.18129  5882.50867  5958.79200     0.00017   
   1750    17.18998  5948.56998  5927.36330     0.00017   
   1751    17.19866  5979.83765  5859.12060     0.00017   
   1752    17.20734  5985.90921  5779.62260     0.00017   
   1753    17.21603  5979.06555  5712.00000     0.00018   
   1754    17.22471  5971.46442  5668.19290     0.00018   
   1755    17.23340  5972.34793  5658.35600     0.00018   
   1756    17.24208  5988.07401  5676.11820     0.00018   
   1757    17.25077  6027.03963  5726.88130     0.00017   
   1758    17.25945  6101.80441  5817.91890     0.00017   
   1759    17.26813  6222.80579  5965.21530     0.00017   
   1760    17.27681  6389.65456  6183.36470     0.00016   
   1761    17.28550  6586.29656  6467.62300     0.00015   
   1762    17.29418  6780.25906  6753.83980     0.00015   
   1763    17.30287  6926.32334  6974.81200     0.00014   
   1764    17.31155  6978.17947  7036.19820     0.00014   
   1765    17.32024  6910.30963  6926.02050     0.00014   
   1766    17.32892  6735.15976  6680.23490     0.00015   
   1767    17.33761  6494.10724  6380.22020     0.00016   
   1768    17.34629  6232.15145  6103.17480     0.00016   
   1769    17.35497  5981.23070  5867.00680     0.00017   
   1770    17.36366  5759.25948  5679.74950     0.00018   
   1771    17.37234  5574.70844  5536.92720     0.00018   
   1772    17.38102  5430.79117  5426.39790     0.00018   
   1773    17.38971  5327.03390  5335.77490     0.00019   
   1774    17.39839  5262.11363  5260.76860     0.00019   
   1775    17.40708  5237.00173  5200.09330     0.00019   
   1776    17.41576  5254.95689  5163.04640     0.00019   
   1777    17.42444  5318.48864  5155.00000     0.00019   
   1778    17.43313  5426.37087  5185.97310     0.00019   
   1779    17.44181  5571.60344  5256.24710     0.00019   
   1780    17.45050  5740.21234  5363.27980     0.00019   
   1781    17.45918  5912.11970  5494.89840     0.00018   
   1782    17.46786  6064.14616  5638.43950     0.00018   
   1783    17.47655  6174.44667  5767.05910     0.00017   
   1784    17.48523  6228.17323  5871.27050     0.00017   
   1785    17.49392  6223.96853  5937.75930     0.00017   
   1786    17.50260  6172.27260  5985.47610     0.00017   
   1787    17.51128  6084.51201  6015.02880     0.00017   
   1788    17.51997  5966.21325  6001.99510     0.00017   
   1789    17.52865  5820.57386  5932.86230     0.00017   
   1790    17.53734  5655.21442  5787.41360     0.00017   
   1791    17.54602  5483.22031  5599.99660     0.00018   
   1792    17.55470  5318.56544  5398.53810     0.00019   
   1793    17.56339  5171.66406  5225.20850     0.00019   
   1794    17.57207  5048.67145  5091.71680     0.00020   
   1795    17.58076  4952.86863  5000.53270     0.00020   
   1796    17.58944  4886.70423  4943.27050     0.00020   
   1797    17.59812  4853.02826  4929.48240     0.00020   
   1798    17.60681  4855.83306  4951.39010     0.00020   
   1799    17.61549  4900.28064  5011.54390     0.00020   
   1800    17.62418  4992.07063  5110.71290     0.00020   
   1801    17.63286  5136.03546  5248.24270     0.00019   
   1802    17.64154  5334.07179  5432.76120     0.00018   
   1803    17.65023  5582.61960  5663.70850     0.00018   
   1804    17.65891  5869.56044  5936.34670     0.00017   
   1805    17.66760  6171.00864  6238.22120     0.00016   
   1806    17.67628  6449.32010  6498.51810     0.00015   
   1807    17.68496  6659.50195  6677.33890     0.00015   
   1808    17.69365  6766.41684  6739.75000     0.00015   
   1809    17.70233  6759.29513  6703.69630     0.00015   
   1810    17.71102  6646.44964  6585.02640     0.00015   
   1811    17.71970  6445.37998  6397.81590     0.00016   
   1812    17.72838  6184.06541  6155.54000     0.00016   
   1813    17.73707  5900.73745  5875.60640     0.00017   
   1814    17.74575  5633.66105  5618.48830     0.00018   
   1815    17.75444  5411.70823  5402.35250     0.00019   
   1816    17.76312  5252.30759  5256.08350     0.00019   
   1817    17.77181  5163.41037  5179.21140     0.00019   
   1818    17.78049  5145.40743  5166.60940     0.00019   
   1819    17.78917  5192.32870  5216.27390     0.00019   
   1820    17.79785  5292.15740  5331.76900     0.00019   
   1821    17.80654  5426.35672  5504.68410     0.00018   
   1822    17.81522  5568.75372  5707.64750     0.00018   
   1823    17.82391  5686.38555  5893.29980     0.00017   
   1824    17.83259  5744.00904  5979.66940     0.00017   
   1825    17.84128  5720.55389  5936.22170     0.00017   
   1826    17.84996  5621.69771  5775.21920     0.00017   
   1827    17.85864  5474.32334  5561.99560     0.00018   
   1828    17.86733  5309.89437  5341.83150     0.00019   
   1829    17.87601  5153.64519  5157.51510     0.00019   
   1830    17.88470  5021.99938  5020.45070     0.00020   
   1831    17.89338  4923.58564  4927.80520     0.00020   
   1832    17.90206  4861.10718  4882.19820     0.00020   
   1833    17.91075  4832.90890  4878.85010     0.00020   
   1834    17.91943  4834.59042  4914.88820     0.00020   
   1835    17.92812  4860.18964  4986.73390     0.00020   
   1836    17.93680  4903.14231  5100.39790     0.00020   
   1837    17.94548  4956.03400  5250.72660     0.00019   
   1838    17.95417  5010.75109  5449.46730     0.00018   
   1839    17.96285  5058.61789  5661.43850     0.00018   
   1840    17.97154  5091.58914  5840.62550     0.00017   
   1841    17.98022  5104.45289  5932.27340     0.00017   
   1842    17.98890  5096.95197  5893.04300     0.00017   
   1843    17.99759  5074.01031  5740.15530     0.00017   
   1844    18.00627  5043.77916  5525.50590     0.00018   
   1845    18.01496  5015.02135  5320.00980     0.00019   
   1846    18.02364  4995.56807  5149.14750     0.00019   
   1847    18.03232  4992.29081  5029.91410     0.00020   
   1848    18.04101  5011.86283  4963.66850     0.00020   
   1849    18.04969  5061.02206  4947.08200     0.00020   
   1850    18.05838  5145.27616  4977.79930     0.00020   
   1851    18.06706  5266.82567  5055.60890     0.00020   
   1852    18.07575  5422.66059  5170.92290     0.00019   
   1853    18.08443  5602.87880  5323.19240     0.00019   
   1854    18.09311  5789.75778  5504.22950     0.00018   
   1855    18.10179  5958.44269  5681.68260     0.00018   
   1856    18.11048  6080.98302  5837.27930     0.00017   
   1857    18.11916  6138.33010  5923.88570     0.00017   
   1858    18.12785  6134.68974  5941.74560     0.00017   
   1859    18.13653  6097.15372  5912.93160     0.00017   
   1860    18.14522  6058.95584  5898.43990     0.00017   
   1861    18.15390  6045.60719  5925.75200     0.00017   
   1862    18.16258  6072.20577  6030.85940     0.00017   
   1863    18.17127  6144.15597  6221.84860     0.00016   
   1864    18.17995  6255.05921  6523.92480     0.00015   
   1865    18.18864  6384.32654  6886.98540     0.00015   
   1866    18.19732  6498.14373  7238.61180     0.00014   
   1867    18.20600  6555.45238  7466.25980     0.00013   
   1868    18.21469  6523.97598  7448.51900     0.00013   
   1869    18.22337  6401.98315  7182.75980     0.00014   
   1870    18.23206  6221.67962  6795.05620     0.00015   
   1871    18.24074  6028.62218  6396.07520     0.00016   
   1872    18.24942  5861.29968  6066.16850     0.00016   
   1873    18.25811  5743.79285  5864.75200     0.00017   
   1874    18.26679  5686.06682  5784.86040     0.00017   
   1875    18.27548  5685.69791  5824.91210     0.00017   
   1876    18.28416  5729.58467  5939.74510     0.00017   
   1877    18.29285  5797.14589  6086.27290     0.00016   
   1878    18.30153  5868.26736  6186.02830     0.00016   
   1879    18.31021  5934.82447  6200.66110     0.00016   
   1880    18.31890  6004.83422  6140.89500     0.00016   
   1881    18.32758  6093.37685  6064.11570     0.00016   
   1882    18.33626  6209.83517  6025.89700     0.00017   
   1883    18.34495  6350.47033  6066.69480     0.00016   
   1884    18.35363  6495.87231  6181.48440     0.00016   
   1885    18.36232  6612.45301  6310.21480     0.00016   
   1886    18.37100  6663.09750  6364.93900     0.00016   
   1887    18.37968  6627.53195  6306.36280     0.00016   
   1888    18.38837  6515.41969  6149.42040     0.00016   
   1889    18.39705  6356.86938  5945.22900     0.00017   
   1890    18.40574  6182.70060  5755.19680     0.00017   
   1891    18.41442  6013.36176  5615.83980     0.00018   
   1892    18.42310  5858.81207  5516.61520     0.00018   
   1893    18.43179  5723.02170  5442.45260     0.00018   
   1894    18.44047  5608.62353  5376.78170     0.00019   
   1895    18.44916  5518.32446  5325.66260     0.00019   
   1896    18.45784  5453.27368  5304.53420     0.00019   
   1897    18.46652  5411.14444  5329.30370     0.00019   
   1898    18.47521  5385.26111  5398.02690     0.00019   
   1899    18.48389  5365.24372  5486.87300     0.00018   
   1900    18.49258  5339.44641  5557.41990     0.00018   
   1901    18.50126  5299.03548  5560.41110     0.00018   
   1902    18.50994  5241.74165  5480.35010     0.00018   
   1903    18.51863  5172.57070  5344.08450     0.00019   
   1904    18.52731  5101.46740  5195.69040     0.00019   
   1905    18.53600  5040.31648  5059.85060     0.00020   
   1906    18.54468  5001.48819  4970.48290     0.00020   
   1907    18.55336  4997.59786  4926.67680     0.00020   
   1908    18.56205  5041.30106  4936.95360     0.00020   
   1909    18.57073  5144.45098  5008.88820     0.00020   
   1910    18.57942  5316.22536  5148.15580     0.00019   
   1911    18.58810  5560.23534  5367.14500     0.00019   
   1912    18.59679  5871.16755  5683.45800     0.00018   
   1913    18.60547  6230.97469  6111.44190     0.00016   
   1914    18.61415  6605.00238  6624.14310     0.00015   
   1915    18.62283  6938.89218  7158.21920     0.00014   
   1916    18.63152  7162.32721  7527.27490     0.00013   
   1917    18.64020  7213.47784  7593.36040     0.00013   
   1918    18.64889  7076.53929  7325.99220     0.00014   
   1919    18.65757  6793.88972  6856.27830     0.00015   
   1920    18.66626  6436.62485  6305.98580     0.00016   
   1921    18.67494  6069.95719  5820.32130     0.00017   
   1922    18.68362  5739.48076  5461.51070     0.00018   
   1923    18.69231  5471.82598  5209.10990     0.00019   
   1924    18.70099  5278.72082  5064.24850     0.00020   
   1925    18.70968  5160.85409  4999.23340     0.00020   
   1926    18.71836  5110.20029  5005.13380     0.00020   
   1927    18.72704  5111.53111  5063.07130     0.00020   
   1928    18.73573  5143.41503  5154.21190     0.00019   
   1929    18.74441  5179.22420  5236.95800     0.00019   
   1930    18.75310  5190.86544  5279.23580     0.00019   
   1931    18.76178  5158.11628  5257.66990     0.00019   
   1932    18.77046  5078.45243  5174.31690     0.00019   
   1933    18.77915  4965.86214  5054.22610     0.00020   
   1934    18.78783  4839.88085  4932.27050     0.00020   
   1935    18.79652  4716.84813  4827.01710     0.00021   
   1936    18.80520  4607.52862  4746.04150     0.00021   
   1937    18.81388  4517.86597  4686.40870     0.00021   
   1938    18.82257  4450.11063  4645.97610     0.00022   
   1939    18.83125  4403.92376  4619.47560     0.00022   
   1940    18.83994  4377.48299  4604.46730     0.00022   
   1941    18.84862  4368.29369  4597.30960     0.00022   
   1942    18.85730  4373.81468  4596.24270     0.00022   
   1943    18.86599  4391.73804  4601.29790     0.00022   
   1944    18.87467  4420.00802  4610.75780     0.00022   
   1945    18.88336  4456.68578  4624.84520     0.00022   
   1946    18.89204  4499.85039  4643.65230     0.00022   
   1947    18.90072  4547.86262  4666.42290     0.00021   
   1948    18.90941  4600.46201  4696.25150     0.00021   
   1949    18.91809  4660.79694  4733.27880     0.00021   
   1950    18.92677  4737.80845  4780.22660     0.00021   
   1951    18.93546  4846.83931  4843.97070     0.00021   
   1952    18.94414  5008.33451  4945.46190     0.00020   
   1953    18.95283  5245.22041  5107.50540     0.00020   
   1954    18.96151  5579.66063  5363.03960     0.00019   
   1955    18.97020  6028.43736  5738.44920     0.00017   
   1956    18.97888  6597.45501  6287.07520     0.00016   
   1957    18.98756  7275.14786  7058.76120     0.00014   
   1958    18.99625  8025.62425  8093.42040     0.00012   
   1959    19.00493  8781.12084  9317.71780     0.00011   
   1960    19.01362  9436.91009 10464.85000     0.00010   
   1961    19.02230  9863.30817 11243.76400     0.00009   
   1962    19.03098  9957.03808 11328.40100     0.00009   
   1963    19.03967  9706.85306 10709.18100     0.00009   
   1964    19.04835  9204.10876  9690.64650     0.00010   
   1965    19.05703  8583.85725  8630.73240     0.00012   
   1966    19.06572  7967.38031  7692.41990     0.00013   
   1967    19.07440  7443.29634  7022.65770     0.00014   
   1968    19.08309  7069.10471  6590.21530     0.00015   
   1969    19.09177  6875.83385  6405.52690     0.00016   
   1970    19.10046  6870.33441  6447.32670     0.00016   
   1971    19.10914  7037.18627  6707.99850     0.00015   
   1972    19.11783  7340.69551  7188.34180     0.00014   
   1973    19.12651  7725.05698  7871.30810     0.00013   
   1974    19.13519  8112.89583  8661.53810     0.00012   
   1975    19.14388  8406.66882  9327.77340     0.00011   
   1976    19.15256  8510.49226  9660.67680     0.00010   
   1977    19.16124  8375.25184  9496.40530     0.00011   
   1978    19.16993  8028.93155  8886.80960     0.00011   
   1979    19.17861  7553.53874  8032.80270     0.00012   
   1980    19.18730  7037.26852  7208.07960     0.00014   
   1981    19.19598  6547.94375  6518.68700     0.00015   
   1982    19.20466  6128.78375  6004.87600     0.00017   
   1983    19.21335  5801.50682  5668.61670     0.00018   
   1984    19.22203  5570.32975  5456.76070     0.00018   
   1985    19.23072  5426.34715  5353.06590     0.00019   
   1986    19.23940  5351.70285  5316.20750     0.00019   
   1987    19.24808  5324.78394  5319.34180     0.00019   
   1988    19.25677  5325.89962  5337.19630     0.00019   
   1989    19.26545  5343.20994  5361.89360     0.00019   
   1990    19.27414  5375.54518  5395.72900     0.00019   
   1991    19.28282  5430.05613  5453.34770     0.00018   
   1992    19.29150  5517.13268  5547.24120     0.00018   
   1993    19.30019  5646.48454  5699.77250     0.00018   
   1994    19.30887  5825.19785  5919.02200     0.00017   
   1995    19.31756  6056.79144  6237.25680     0.00016   
   1996    19.32624  6340.06878  6658.25150     0.00015   
   1997    19.33492  6665.48552  7184.26810     0.00014   
   1998    19.34361  7010.80188  7714.68160     0.00013   
   1999    19.35229  7339.87434  8148.99170     0.00012   
   2000    19.36098  7612.32851  8364.43750     0.00012   
   2001    19.36966  7799.31003  8319.04590     0.00012   
   2002    19.37834  7893.61700  8067.64400     0.00012   
   2003    19.38703  7909.29985  7720.41940     0.00013   
   2004    19.39571  7876.47771  7362.64110     0.00014   
   2005    19.40440  7827.52536  7080.14210     0.00014   
   2006    19.41308  7776.73776  6898.48100     0.00014   
   2007    19.42176  7708.30645  6782.28470     0.00015   
   2008    19.43045  7583.82270  6660.24070     0.00015   
   2009    19.43913  7370.90039  6478.24610     0.00015   
   2010    19.44781  7072.18402  6234.00290     0.00016   
   2011    19.45650  6724.68437  5961.62110     0.00017   
   2012    19.46518  6373.58816  5706.43800     0.00018   
   2013    19.47387  6053.27770  5510.92720     0.00018   
   2014    19.48255  5785.07740  5382.19040     0.00019   
   2015    19.49124  5580.82671  5322.42290     0.00019   
   2016    19.49992  5443.33801  5323.18210     0.00019   
   2017    19.50860  5365.27555  5380.16700     0.00019   
   2018    19.51729  5329.37234  5468.93700     0.00018   
   2019    19.52597  5310.46275  5567.12550     0.00018   
   2020    19.53466  5280.64346  5627.87650     0.00018   
   2021    19.54334  5218.52452  5618.07860     0.00018   
   2022    19.55202  5118.45874  5525.64990     0.00018   
   2023    19.56071  4991.22649  5381.33150     0.00019   
   2024    19.56939  4854.65026  5222.02390     0.00019   
   2025    19.57807  4724.24635  5080.14990     0.00020   
   2026    19.58676  4609.64828  4983.43210     0.00020   
   2027    19.59544  4514.74900  4926.15330     0.00020   
   2028    19.60413  4438.65829  4896.72310     0.00020   
   2029    19.61281  4377.28423  4870.50340     0.00021   
   2030    19.62150  4325.73105  4833.01560     0.00021   
   2031    19.63018  4280.76841  4782.54740     0.00021   
   2032    19.63886  4241.49237  4724.33640     0.00021   
   2033    19.64755  4208.31175  4670.11330     0.00021   
   2034    19.65623  4181.70749  4627.01560     0.00022   
   2035    19.66492  4162.03062  4597.00200     0.00022   
   2036    19.67360  4149.50604  4578.47850     0.00022   
   2037    19.68228  4144.37194  4570.09620     0.00022   
   2038    19.69097  4147.05990  4568.49320     0.00022   
   2039    19.69965  4158.46943  4574.38920     0.00022   
   2040    19.70834  4180.36249  4585.67240     0.00022   
   2041    19.71702  4215.84800  4603.17480     0.00022   
   2042    19.72570  4269.89765  4628.65920     0.00022   
   2043    19.73439  4349.78013  4663.96880     0.00021   
   2044    19.74307  4465.25023  4714.62550     0.00021   
   2045    19.75175  4628.11495  4792.49320     0.00021   
   2046    19.76044  4851.36366  4906.17290     0.00020   
   2047    19.76912  5146.76718  5073.43120     0.00020   
   2048    19.77781  5521.73210  5312.17090     0.00019   
   2049    19.78649  5974.84602  5637.58890     0.00018   
   2050    19.79518  6490.94117  6068.29150     0.00016   
   2051    19.80386  7037.06822  6592.26710     0.00015   
   2052    19.81254  7563.47173  7190.86620     0.00014   
   2053    19.82123  8008.82792  7767.98440     0.00013   
   2054    19.82991  8306.64331  8185.43070     0.00012   
   2055    19.83860  8395.60291  8331.27340     0.00012   
   2056    19.84728  8245.57280  8127.53910     0.00012   
   2057    19.85596  7885.55792  7632.59420     0.00013   
   2058    19.86465  7394.75931  7002.27880     0.00014   
   2059    19.87333  6863.02965  6394.90280     0.00016   
   2060    19.88201  6359.82527  5883.04640     0.00017   
   2061    19.89070  5926.87665  5517.07230     0.00018   
   2062    19.89938  5582.00817  5278.80420     0.00019   
   2063    19.90807  5324.62210  5142.77690     0.00019   
   2064    19.91675  5140.24451  5072.81050     0.00020   
   2065    19.92544  5006.26256  5031.40720     0.00020   
   2066    19.93412  4900.01756  4992.17140     0.00020   
   2067    19.94280  4807.66508  4943.09420     0.00020   
   2068    19.95149  4727.26786  4888.40670     0.00020   
   2069    19.96017  4664.24389  4842.07520     0.00021   
   2070    19.96886  4625.29003  4816.34080     0.00021   
   2071    19.97754  4615.22700  4820.76070     0.00021   
   2072    19.98622  4635.81387  4856.41850     0.00021   
   2073    19.99491  4685.05828  4925.31640     0.00020   
   2074    20.00359  4756.60313  5023.73730     0.00020   
   2075    20.01228  4839.74307  5139.10010     0.00019   
   2076    20.02096  4921.34251  5247.23680     0.00019   
   2077    20.02964  4989.18097  5327.32180     0.00019   
   2078    20.03833  5035.54500  5364.15040     0.00019   
   2079    20.04701  5058.96239  5353.80960     0.00019   
   2080    20.05570  5063.12595  5314.77390     0.00019   
   2081    20.06438  5053.49771  5275.04050     0.00019   
   2082    20.07306  5033.67262  5250.23730     0.00019   
   2083    20.08175  5002.63889  5235.02490     0.00019   
   2084    20.09043  4955.02932  5211.22660     0.00019   
   2085    20.09912  4886.36620  5165.43310     0.00019   
   2086    20.10780  4798.60623  5098.14940     0.00020   
   2087    20.11648  4700.87415  5020.05620     0.00020   
   2088    20.12517  4602.58781  4938.78030     0.00020   
   2089    20.13385  4511.25959  4861.59420     0.00021   
   2090    20.14254  4431.41741  4790.11520     0.00021   
   2091    20.15122  4364.96417  4728.00340     0.00021   
   2092    20.15990  4311.89925  4676.36960     0.00021   
   2093    20.16859  4271.33312  4632.64160     0.00022   
   2094    20.17727  4242.56883  4599.66310     0.00022   
   2095    20.18596  4225.84892  4575.33450     0.00022   
   2096    20.19464  4222.27991  4563.81980     0.00022   
   2097    20.20332  4233.23578  4565.56880     0.00022   
   2098    20.21201  4259.81241  4581.02290     0.00022   
   2099    20.22069  4302.53922  4612.46340     0.00022   
   2100    20.22938  4361.22020  4661.54830     0.00021   
   2101    20.23806  4434.66539  4725.95750     0.00021   
   2102    20.24674  4520.59213  4801.32320     0.00021   
   2103    20.25543  4616.68673  4879.35250     0.00020   
   2104    20.26411  4723.52550  4957.10500     0.00020   
   2105    20.27279  4846.99145  5046.79980     0.00020   
   2106    20.28148  4996.47440  5170.15480     0.00019   
   2107    20.29016  5179.40640  5353.16310     0.00019   
   2108    20.29885  5396.24474  5603.59810     0.00018   
   2109    20.30753  5637.49105  5897.61720     0.00017   
   2110    20.31622  5884.39947  6187.15530     0.00016   
   2111    20.32490  6115.57073  6405.75490     0.00016   
   2112    20.33358  6315.87272  6549.17090     0.00015   
   2113    20.34227  6475.95223  6636.70610     0.00015   
   2114    20.35095  6583.12132  6673.43700     0.00015   
   2115    20.35964  6620.44349  6644.49900     0.00015   
   2116    20.36832  6582.57462  6530.75680     0.00015   
   2117    20.37700  6490.41415  6364.15480     0.00016   
   2118    20.38569  6383.15787  6206.44630     0.00016   
   2119    20.39437  6296.86897  6140.16850     0.00016   
   2120    20.40305  6250.15243  6192.85350     0.00016   
   2121    20.41174  6240.78778  6355.62210     0.00016   
   2122    20.42042  6248.30089  6577.10250     0.00015   
   2123    20.42911  6242.46639  6752.66460     0.00015   
   2124    20.43779  6199.19888  6780.80080     0.00015   
   2125    20.44648  6115.99973  6636.62500     0.00015   
   2126    20.45516  6013.01512  6394.97410     0.00016   
   2127    20.46384  5918.97037  6135.58740     0.00016   
   2128    20.47253  5856.82695  5927.74800     0.00017   
   2129    20.48121  5838.98186  5795.88820     0.00017   
   2130    20.48990  5869.93453  5744.58980     0.00017   
   2131    20.49858  5949.97411  5771.80080     0.00017   
   2132    20.50726  6074.10906  5868.65040     0.00017   
   2133    20.51595  6227.79531  6022.46880     0.00017   
   2134    20.52463  6386.67588  6201.26220     0.00016   
   2135    20.53332  6523.09220  6373.99560     0.00016   
   2136    20.54200  6613.11955  6503.07130     0.00015   
   2137    20.55068  6637.24699  6551.73440     0.00015   
   2138    20.55937  6580.67685  6489.16700     0.00015   
   2139    20.56805  6439.77379  6318.48050     0.00016   
   2140    20.57674  6229.09619  6073.71040     0.00016   
   2141    20.58542  5980.95282  5801.31790     0.00017   
   2142    20.59410  5735.86158  5546.16890     0.00018   
   2143    20.60279  5531.32156  5348.47660     0.00019   
   2144    20.61147  5395.95066  5224.25590     0.00019   
   2145    20.62016  5349.08377  5186.28710     0.00019   
   2146    20.62884  5401.60865  5231.68020     0.00019   
   2147    20.63752  5555.98712  5364.16020     0.00019   
   2148    20.64621  5805.16207  5585.91260     0.00018   
   2149    20.65489  6130.91594  5882.84620     0.00017   
   2150    20.66358  6501.45025  6234.07130     0.00016   
   2151    20.67226  6869.18322  6577.92920     0.00015   
   2152    20.68094  7172.19650  6839.29690     0.00015   
   2153    20.68963  7346.73666  6953.96480     0.00014   
   2154    20.69831  7354.30625  6900.75540     0.00014   
   2155    20.70699  7205.67155  6710.90330     0.00015   
   2156    20.71568  6954.55961  6449.46630     0.00016   
   2157    20.72436  6666.03688  6173.70800     0.00016   
   2158    20.73305  6390.78615  5935.92580     0.00017   
   2159    20.74173  6156.90295  5756.37740     0.00017   
   2160    20.75042  5971.03871  5630.76560     0.00018   
   2161    20.75910  5822.16164  5539.52490     0.00018   
   2162    20.76778  5689.95895  5452.79100     0.00018   
   2163    20.77647  5558.48323  5354.92530     0.00019   
   2164    20.78515  5426.96108  5247.82420     0.00019   
   2165    20.79384  5307.58371  5145.88480     0.00019   
   2166    20.80252  5215.53921  5063.88570     0.00020   
   2167    20.81120  5162.30982  5012.78080     0.00020   
   2168    20.81989  5154.04625  5001.12550     0.00020   
   2169    20.82857  5191.72602  5029.31930     0.00020   
   2170    20.83725  5270.74434  5090.82960     0.00020   
   2171    20.84594  5380.15274  5174.10160     0.00019   
   2172    20.85462  5503.01107  5262.50980     0.00019   
   2173    20.86331  5619.46387  5343.35790     0.00019   
   2174    20.87199  5710.99964  5402.98580     0.00019   
   2175    20.88068  5762.98443  5428.58060     0.00018   
   2176    20.88936  5766.70173  5413.50930     0.00018   
   2177    20.89804  5723.95631  5366.91410     0.00019   
   2178    20.90673  5650.27999  5303.66410     0.00019   
   2179    20.91541  5570.67068  5249.83590     0.00019   
   2180    20.92410  5509.86829  5221.49950     0.00019   
   2181    20.93278  5484.51930  5233.49710     0.00019   
   2182    20.94146  5499.51717  5288.18700     0.00019   
   2183    20.95015  5546.73212  5371.42920     0.00019   
   2184    20.95883  5605.68584  5451.99660     0.00018   
   2185    20.96752  5648.73442  5495.04440     0.00018   
   2186    20.97620  5652.42867  5484.08590     0.00018   
   2187    20.98488  5608.88054  5415.08200     0.00018   
   2188    20.99357  5526.94962  5305.25490     0.00019   
   2189    21.00225  5424.49968  5181.88280     0.00019   
   2190    21.01094  5320.58658  5071.46140     0.00020   
   2191    21.01962  5230.55975  4995.65970     0.00020   
   2192    21.02830  5162.34389  4963.86720     0.00020   
   2193    21.03699  5114.83367  4973.40770     0.00020   
   2194    21.04567  5079.50228  5004.12990     0.00020   
   2195    21.05436  5043.80567  5030.29440     0.00020   
   2196    21.06304  4994.97225  5031.28960     0.00020   
   2197    21.07172  4925.29831  4994.80470     0.00020   
   2198    21.08041  4836.96095  4929.44090     0.00020   
   2199    21.08909  4740.32955  4847.28220     0.00021   
   2200    21.09778  4647.28261  4768.48050     0.00021   
   2201    21.10646  4566.77022  4700.88130     0.00021   
   2202    21.11514  4504.46244  4651.32910     0.00021   
   2203    21.12383  4463.64353  4619.34960     0.00022   
   2204    21.13251  4445.20552  4604.64990     0.00022   
   2205    21.14120  4447.17184  4604.65430     0.00022   
   2206    21.14988  4464.29284  4612.55130     0.00022   
   2207    21.15856  4488.42810  4619.81690     0.00022   
   2208    21.16725  4510.93346  4622.50490     0.00022   
   2209    21.17593  4527.60336  4622.35450     0.00022   
   2210    21.18462  4542.33277  4626.16800     0.00022   
   2211    21.19330  4564.93840  4638.81930     0.00022   
   2212    21.20198  4605.24464  4673.37990     0.00021   
   2213    21.21067  4668.70161  4736.79050     0.00021   
   2214    21.21935  4754.92072  4832.58200     0.00021   
   2215    21.22803  4857.44674  4944.37160     0.00020   
   2216    21.23672  4963.59942  5056.82760     0.00020   
   2217    21.24540  5054.90095  5145.69140     0.00019   
   2218    21.25409  5110.61593  5193.74170     0.00019   
   2219    21.26277  5115.04503  5190.52590     0.00019   
   2220    21.27146  5064.65472  5136.09280     0.00019   
   2221    21.28014  4969.84622  5044.49220     0.00020   
   2222    21.28882  4849.79590  4937.08540     0.00020   
   2223    21.29751  4724.34090  4832.45170     0.00021   
   2224    21.30619  4608.65272  4745.83540     0.00021   
   2225    21.31488  4512.52728  4678.35890     0.00021   
   2226    21.32356  4441.83689  4632.44480     0.00022   
   2227    21.33224  4399.69154  4599.33450     0.00022   
   2228    21.34093  4386.86947  4579.90670     0.00022   
   2229    21.34961  4402.64730  4568.68360     0.00022   
   2230    21.35829  4445.65917  4566.39890     0.00022   
   2231    21.36698  4513.65595  4578.73830     0.00022   
   2232    21.37566  4602.10456  4605.69920     0.00022   
   2233    21.38435  4702.67355  4650.12740     0.00022   
   2234    21.39303  4802.46021  4700.12010     0.00021   
   2235    21.40172  4886.14385  4750.16110     0.00021   
   2236    21.41040  4942.77584  4796.68410     0.00021   
   2237    21.41908  4972.81043  4845.68410     0.00021   
   2238    21.42777  4986.87182  4911.63670     0.00020   
   2239    21.43645  4996.80161  4996.81640     0.00020   
   2240    21.44514  5007.80359  5097.14010     0.00020   
   2241    21.45382  5016.27052  5185.52150     0.00019   
   2242    21.46250  5013.07395  5238.23540     0.00019   
   2243    21.47119  4991.46634  5239.18360     0.00019   
   2244    21.47987  4953.29956  5189.15670     0.00019   
   2245    21.48856  4907.08093  5102.27540     0.00020   
   2246    21.49724  4861.34361  4997.44870     0.00020   
   2247    21.50592  4821.49454  4897.32760     0.00020   
   2248    21.51461  4791.50473  4818.12600     0.00021   
   2249    21.52329  4775.88859  4766.76420     0.00021   
   2250    21.53197  4779.08135  4740.52200     0.00021   
   2251    21.54066  4803.79800  4729.61040     0.00021   
   2252    21.54934  4850.59951  4729.53320     0.00021   
   2253    21.55803  4919.22229  4736.00390     0.00021   
   2254    21.56671  5010.64391  4754.99370     0.00021   
   2255    21.57540  5127.79690  4790.92090     0.00021   
   2256    21.58408  5273.90431  4857.45360     0.00021   
   2257    21.59276  5450.14127  4971.40430     0.00020   
   2258    21.60145  5653.75200  5145.24610     0.00019   
   2259    21.61013  5876.79190  5398.69870     0.00019   
   2260    21.61882  6105.41082  5726.00880     0.00017   
   2261    21.62750  6320.64861  6101.99510     0.00016   
   2262    21.63618  6501.78676  6459.97310     0.00015   
   2263    21.64487  6631.08706  6714.81450     0.00015   
   2264    21.65355  6698.73424  6816.67630     0.00015   
   2265    21.66223  6706.70173  6754.91700     0.00015   
   2266    21.67092  6670.24556  6582.66460     0.00015   
   2267    21.67960  6614.50897  6364.13130     0.00016   
   2268    21.68829  6566.58537  6168.70410     0.00016   
   2269    21.69697  6547.43377  6046.08150     0.00017   
   2270    21.70566  6567.75855  6030.59080     0.00017   
   2271    21.71434  6628.43720  6116.02290     0.00016   
   2272    21.72302  6723.89010  6279.19380     0.00016   
   2273    21.73171  6844.55621  6474.64310     0.00015   
   2274    21.74039  6975.65308  6651.15330     0.00015   
   2275    21.74908  7096.45691  6759.79980     0.00015   
   2276    21.75776  7188.56252  6796.12840     0.00015   
   2277    21.76644  7249.63724  6781.72410     0.00015   
   2278    21.77513  7295.89582  6779.93360     0.00015   
   2279    21.78381  7347.22074  6839.35940     0.00015   
   2280    21.79250  7410.96882  7005.07620     0.00014   
   2281    21.80118  7477.69905  7264.66460     0.00014   
   2282    21.80986  7524.35469  7546.79980     0.00013   
   2283    21.81855  7517.98605  7752.84280     0.00013   
   2284    21.82723  7424.69320  7782.79790     0.00013   
   2285    21.83592  7227.59866  7606.82130     0.00013   
   2286    21.84460  6938.48023  7240.66800     0.00014   
   2287    21.85328  6588.45862  6745.97510     0.00015   
   2288    21.86197  6210.21501  6195.52290     0.00016   
   2289    21.87065  5829.82962  5676.70260     0.00018   
   2290    21.87934  5467.79510  5234.63670     0.00019   
   2291    21.88802  5140.48225  4901.67630     0.00020   
   2292    21.89670  4859.26797  4663.70800     0.00021   
   2293    21.90539  4629.33865  4502.65820     0.00022   
   2294    21.91407  4450.72961  4391.89890     0.00023   
   2295    21.92276  4320.34935  4316.89500     0.00023   
   2296    21.93144  4233.56632  4270.60840     0.00023   
   2297    21.94012  4185.43570  4244.94630     0.00024   
   2298    21.94881  4171.06159  4236.56840     0.00024   
   2299    21.95749  4185.52600  4244.85550     0.00024   
   2300    21.96618  4223.40767  4271.44380     0.00023   
   2301    21.97486  4278.04372  4313.75980     0.00023   
   2302    21.98354  4340.56530  4365.41650     0.00023   
   2303    21.99223  4399.34247  4414.83790     0.00023   
   2304    22.00091  4441.47831  4452.27590     0.00022   
   2305    22.00960  4457.69555  4467.67630     0.00022   
   2306    22.01828  4447.30532  4462.43310     0.00022   
   2307    22.02696  4417.53059  4441.35350     0.00023   
   2308    22.03565  4377.76899  4409.80220     0.00023   
   2309    22.04433  4334.93093  4369.20410     0.00023   
   2310    22.05301  4292.70534  4326.23000     0.00023   
   2311    22.06170  4252.57155  4284.70750     0.00023   
   2312    22.07038  4214.58423  4247.80760     0.00024   
   2313    22.07907  4178.27799  4216.67480     0.00024   
   2314    22.08775  4143.76944  4190.90870     0.00024   
   2315    22.09644  4111.76750  4170.21920     0.00024   
   2316    22.10512  4082.41686  4151.27730     0.00024   
   2317    22.11380  4054.87201  4135.07910     0.00024   
   2318    22.12249  4028.80407  4119.40230     0.00024   
   2319    22.13117  4006.19024  4110.68650     0.00024   
   2320    22.13986  3991.14084  4105.52490     0.00024   
   2321    22.14854  3988.10144  4107.16850     0.00024   
   2322    22.15722  4000.37439  4116.37110     0.00024   
   2323    22.16591  4029.69284  4141.24900     0.00024   
   2324    22.17459  4076.42946  4181.68020     0.00024   
   2325    22.18327  4139.87913  4237.57080     0.00024   
   2326    22.19196  4217.72642  4306.24020     0.00023   
   2327    22.20064  4305.18068  4386.49950     0.00023   
   2328    22.20933  4394.26550  4471.93410     0.00022   
   2329    22.21801  4474.59879  4554.77690     0.00022   
   2330    22.22670  4536.15109  4625.09670     0.00022   
   2331    22.23538  4573.20467  4683.67530     0.00021   
   2332    22.24406  4585.91174  4728.25590     0.00021   
   2333    22.25275  4577.65585  4754.55270     0.00021   
   2334    22.26143  4551.89920  4755.66210     0.00021   
   2335    22.27012  4511.41650  4725.86040     0.00021   
   2336    22.27880  4458.23909  4675.21730     0.00021   
   2337    22.28748  4393.40543  4599.83890     0.00022   
   2338    22.29617  4318.02634  4510.39260     0.00022   
   2339    22.30485  4235.46369  4413.31640     0.00023   
   2340    22.31354  4151.82142  4319.69970     0.00023   
   2341    22.32222  4073.89009  4240.01120     0.00024   
   2342    22.33090  4007.07280  4177.93160     0.00024   
   2343    22.33959  3954.80756  4140.13280     0.00024   
   2344    22.34827  3918.93945  4124.72610     0.00024   
   2345    22.35695  3900.14255  4136.45510     0.00024   
   2346    22.36564  3898.18937  4167.66110     0.00024   
   2347    22.37432  3911.89503  4216.44290     0.00024   
   2348    22.38301  3939.09788  4275.64360     0.00023   
   2349    22.39169  3976.87282  4341.44430     0.00023   
   2350    22.40038  4022.12980  4415.70020     0.00023   
   2351    22.40906  4072.13160  4495.23240     0.00022   
   2352    22.41774  4124.06045  4578.52780     0.00022   
   2353    22.42643  4173.63631  4647.11280     0.00022   
   2354    22.43511  4214.11432  4683.61470     0.00021   
   2355    22.44380  4237.96799  4687.62700     0.00021   
   2356    22.45248  4241.39582  4653.77490     0.00021   
   2357    22.46116  4227.42350  4594.39550     0.00022   
   2358    22.46985  4203.65521  4518.18020     0.00022   
   2359    22.47853  4177.31235  4438.57810     0.00023   
   2360    22.48721  4152.64412  4369.22950     0.00023   
   2361    22.49590  4131.73683  4312.77440     0.00023   
   2362    22.50458  4116.37015  4280.67240     0.00023   
   2363    22.51327  4108.35100  4264.17580     0.00023   
   2364    22.52195  4108.20355  4257.53030     0.00023   
   2365    22.53064  4114.02243  4256.70360     0.00023   
   2366    22.53932  4122.16153  4258.78470     0.00023   
   2367    22.54800  4129.66271  4268.73730     0.00023   
   2368    22.55669  4136.48254  4284.66850     0.00023   
   2369    22.56537  4145.01778  4314.43210     0.00023   
   2370    22.57406  4157.46977  4357.18700     0.00023   
   2371    22.58274  4173.76125  4404.81740     0.00023   
   2372    22.59142  4190.92209  4449.41890     0.00022   
   2373    22.60011  4203.48387  4473.34570     0.00022   
   2374    22.60879  4205.07016  4477.05220     0.00022   
   2375    22.61748  4191.72476  4448.88620     0.00022   
   2376    22.62616  4165.17261  4395.40530     0.00023   
   2377    22.63484  4132.46406  4322.06790     0.00023   
   2378    22.64353  4102.30837  4241.74850     0.00024   
   2379    22.65221  4081.85555  4171.81490     0.00024   
   2380    22.66089  4075.77229  4112.36770     0.00024   
   2381    22.66958  4086.56927  4076.38770     0.00025   
   2382    22.67826  4114.93634  4063.66310     0.00025   
   2383    22.68695  4159.40517  4073.48140     0.00025   
   2384    22.69563  4215.72020  4106.18460     0.00024   
   2385    22.70432  4276.82497  4149.87010     0.00024   
   2386    22.71300  4334.46350  4211.00730     0.00024   
   2387    22.72168  4382.23880  4274.33640     0.00023   
   2388    22.73037  4417.47989  4334.76070     0.00023   
   2389    22.73905  4440.06616  4379.85250     0.00023   
   2390    22.74774  4450.54358  4403.30270     0.00023   
   2391    22.75642  4450.77338  4407.58740     0.00023   
   2392    22.76510  4445.81685  4389.25730     0.00023   
   2393    22.77379  4443.53303  4366.84670     0.00023   
   2394    22.78247  4451.79966  4344.39940     0.00023   
   2395    22.79116  4476.25565  4334.82370     0.00023   
   2396    22.79984  4520.52468  4341.50540     0.00023   
   2397    22.80852  4588.37433  4367.64550     0.00023   
   2398    22.81721  4685.24339  4431.54150     0.00023   
   2399    22.82589  4816.62180  4532.41600     0.00022   
   2400    22.83458  4984.08889  4678.77930     0.00021   
   2401    22.84326  5181.43188  4860.61720     0.00021   
   2402    22.85194  5392.12735  5057.67140     0.00020   
   2403    22.86063  5588.19894  5242.24270     0.00019   
   2404    22.86931  5733.56293  5377.46290     0.00019   
   2405    22.87799  5795.78474  5440.76120     0.00018   
   2406    22.88668  5761.21512  5414.81400     0.00018   
   2407    22.89536  5639.63066  5307.46340     0.00019   
   2408    22.90405  5454.42437  5134.11870     0.00019   
   2409    22.91273  5232.41351  4920.99850     0.00020   
   2410    22.92142  4999.69595  4711.06050     0.00021   
   2411    22.93010  4778.86513  4516.63180     0.00022   
   2412    22.93878  4586.04910  4365.47120     0.00023   
   2413    22.94747  4430.09032  4248.42630     0.00024   
   2414    22.95615  4313.93446  4169.61470     0.00024   
   2415    22.96484  4237.18275  4125.90140     0.00024   
   2416    22.97352  4198.60510  4100.44530     0.00024   
   2417    22.98220  4197.80766  4097.03660     0.00024   
   2418    22.99089  4236.04363  4108.43360     0.00024   
   2419    22.99957  4316.21459  4140.28320     0.00024   
   2420    23.00825  4442.38790  4197.21190     0.00024   
   2421    23.01694  4618.70207  4281.31790     0.00023   
   2422    23.02562  4847.68190  4403.88720     0.00023   
   2423    23.03431  5128.25475  4568.87550     0.00022   
   2424    23.04299  5453.93930  4785.20510     0.00021   
   2425    23.05168  5811.00564  5051.15580     0.00020   
   2426    23.06036  6176.46357  5349.67870     0.00019   
   2427    23.06904  6514.61783  5635.02100     0.00018   
   2428    23.07773  6775.55033  5863.95120     0.00017   
   2429    23.08641  6903.91022  5978.02250     0.00017   
   2430    23.09510  6862.38125  5967.67970     0.00017   
   2431    23.10378  6656.11092  5820.66700     0.00017   
   2432    23.11246  6330.64530  5579.50100     0.00018   
   2433    23.12115  5945.83742  5264.03270     0.00019   
   2434    23.12983  5552.61115  4949.91650     0.00020   
   2435    23.13852  5185.77809  4658.67380     0.00021   
   2436    23.14720  4866.31424  4428.71920     0.00023   
   2437    23.15588  4605.03307  4272.48100     0.00023   
   2438    23.16457  4404.71223  4170.88040     0.00024   
   2439    23.17325  4262.09743  4118.49560     0.00024   
   2440    23.18193  4169.73048  4090.36230     0.00024   
   2441    23.19062  4117.63486  4083.83960     0.00024   
   2442    23.19930  4094.93665  4097.33940     0.00024   
   2443    23.20799  4090.70720  4120.74270     0.00024   
   2444    23.21667  4094.59385  4153.82520     0.00024   
   2445    23.22536  4097.60369  4185.21970     0.00024   
   2446    23.23404  4093.19810  4211.47360     0.00024   
   2447    23.24272  4077.51925  4227.75050     0.00024   
   2448    23.25141  4048.36762  4222.86280     0.00024   
   2449    23.26009  4004.84167  4202.95360     0.00024   
   2450    23.26878  3948.53553  4157.55220     0.00024   
   2451    23.27746  3884.31755  4106.10160     0.00024   
   2452    23.28614  3818.76192  4045.62820     0.00025   
   2453    23.29483  3757.69699  3986.92040     0.00025   
   2454    23.30351  3705.16018  3940.08130     0.00025   
   2455    23.31219  3663.49315  3899.13260     0.00026   
   2456    23.32088  3633.81761  3875.79710     0.00026   
   2457    23.32956  3616.57056  3858.64920     0.00026   
   2458    23.33825  3611.78588  3849.41160     0.00026   
   2459    23.34693  3619.24835  3849.27420     0.00026   
   2460    23.35562  3638.54667  3854.09910     0.00026   
   2461    23.36430  3668.99848  3870.95650     0.00026   
   2462    23.37298  3709.45858  3893.18160     0.00026   
   2463    23.38167  3758.00348  3921.07280     0.00026   
   2464    23.39035  3811.73946  3957.91990     0.00025   
   2465    23.39904  3867.24487  3999.11380     0.00025   
   2466    23.40772  3921.50682  4043.69510     0.00025   
   2467    23.41640  3972.78928  4084.85940     0.00024   
   2468    23.42509  4020.20237  4125.47460     0.00024   
   2469    23.43377  4062.86164  4164.31100     0.00024   
   2470    23.44245  4100.13625  4204.89700     0.00024   
   2471    23.45114  4132.86452  4245.95120     0.00024   
   2472    23.45982  4163.46913  4294.08150     0.00023   
   2473    23.46851  4194.12417  4346.96240     0.00023   
   2474    23.47719  4224.90131  4402.59770     0.00023   
   2475    23.48588  4253.70304  4456.76270     0.00022   
   2476    23.49456  4277.93311  4504.36820     0.00022   
   2477    23.50324  4296.48437  4545.76560     0.00022   
   2478    23.51193  4310.48892  4573.50000     0.00022   
   2479    23.52061  4322.41228  4584.02540     0.00022   
   2480    23.52930  4334.32616  4583.01220     0.00022   
   2481    23.53798  4346.49279  4568.54000     0.00022   
   2482    23.54666  4356.54311  4541.33690     0.00022   
   2483    23.55535  4359.41721  4513.05080     0.00022   
   2484    23.56403  4348.77332  4468.45360     0.00022   
   2485    23.57272  4319.62900  4416.65530     0.00023   
   2486    23.58140  4271.21898  4352.37500     0.00023   
   2487    23.59008  4207.77951  4278.81880     0.00023   
   2488    23.59877  4136.81965  4211.11820     0.00024   
   2489    23.60745  4066.56197  4136.85450     0.00024   
   2490    23.61614  4004.60500  4079.14210     0.00025   
   2491    23.62482  3957.48234  4034.41850     0.00025   
   2492    23.63350  3930.49099  4007.37600     0.00025   
   2493    23.64219  3927.55097  4007.41890     0.00025   
   2494    23.65087  3951.02633  4022.78220     0.00025   
   2495    23.65956  4001.53031  4063.94820     0.00025   
   2496    23.66824  4077.72377  4139.11910     0.00024   
   2497    23.67692  4176.12407  4252.10450     0.00024   
   2498    23.68561  4290.90129  4384.75240     0.00023   
   2499    23.69429  4413.06640  4532.16600     0.00022   
   2500    23.70297  4529.36288  4654.94340     0.00021   
   2501    23.71166  4623.42085  4734.66600     0.00021   
   2502    23.72034  4681.18218  4766.31540     0.00021   
   2503    23.72903  4698.61099  4750.64940     0.00021   
   2504    23.73771  4683.83601  4693.31400     0.00021   
   2505    23.74640  4651.68665  4632.47900     0.00022   
   2506    23.75508  4616.66080  4575.13870     0.00022   
   2507    23.76376  4588.57583  4540.85550     0.00022   
   2508    23.77245  4571.04389  4535.17090     0.00022   
   2509    23.78113  4562.43450  4542.41940     0.00022   
   2510    23.78982  4559.24868  4549.66460     0.00022   
   2511    23.79850  4560.43282  4547.41850     0.00022   
   2512    23.80718  4569.41923  4531.85060     0.00022   
   2513    23.81587  4592.30346  4516.12110     0.00022   
   2514    23.82455  4633.87533  4507.17290     0.00022   
   2515    23.83323  4694.68219  4517.23780     0.00022   
   2516    23.84192  4770.24512  4555.24660     0.00022   
   2517    23.85060  4851.32915  4616.71480     0.00022   
   2518    23.85929  4924.67378  4687.28420     0.00021   
   2519    23.86797  4974.51979  4746.55080     0.00021   
   2520    23.87666  4985.35367  4763.46830     0.00021   
   2521    23.88534  4946.76367  4736.36040     0.00021   
   2522    23.89402  4858.99369  4665.53270     0.00021   
   2523    23.90271  4733.31531  4563.49760     0.00022   
   2524    23.91139  4585.66611  4428.64360     0.00023   
   2525    23.92007  4429.77210  4301.93750     0.00023   
   2526    23.92876  4275.46830  4166.59230     0.00024   
   2527    23.93744  4130.18236  4053.29880     0.00025   
   2528    23.94613  3999.97616  3966.52000     0.00025   
   2529    23.95481  3889.15826  3893.92460     0.00026   
   2530    23.96350  3799.66976  3841.26680     0.00026   
   2531    23.97218  3731.30043  3802.95870     0.00026   
   2532    23.98086  3682.41143  3781.54200     0.00026   
   2533    23.98955  3650.67342  3772.79830     0.00027   
   2534    23.99823  3633.51631  3770.67680     0.00027   
   2535    24.00692  3628.40200  3772.35790     0.00027   
   2536    24.01560  3632.97714  3782.48710     0.00026   
   2537    24.02428  3645.33606  3790.47340     0.00026   
   2538    24.03297  3664.54758  3807.63720     0.00026   
   2539    24.04165  3690.95702  3826.61300     0.00026   
   2540    24.05034  3725.56717  3847.95780     0.00026   
   2541    24.05902  3769.07629  3876.73220     0.00026   
   2542    24.06770  3820.71499  3900.89750     0.00026   
   2543    24.07639  3877.66211  3927.01590     0.00025   
   2544    24.08507  3935.55134  3945.21610     0.00025   
   2545    24.09376  3990.01535  3956.86110     0.00025   
   2546    24.10244  4037.71158  3965.21610     0.00025   
   2547    24.11112  4075.18136  3968.68530     0.00025   
   2548    24.11981  4096.79200  3965.65920     0.00025   
   2549    24.12849  4095.54297  3950.64090     0.00025   
   2550    24.13717  4067.06297  3926.65260     0.00025   
   2551    24.14586  4013.47447  3893.68950     0.00026   
   2552    24.15454  3942.75641  3855.72000     0.00026   
   2553    24.16323  3864.49666  3819.44530     0.00026   
   2554    24.17191  3786.53374  3787.10690     0.00026   
   2555    24.18060  3714.19065  3757.22410     0.00027   
   2556    24.18928  3651.20873  3740.06860     0.00027   
   2557    24.19796  3600.27358  3726.59030     0.00027   
   2558    24.20665  3563.01221  3720.16210     0.00027   
   2559    24.21533  3540.10822  3714.06570     0.00027   
   2560    24.22401  3531.58850  3708.71830     0.00027   
   2561    24.23270  3537.14804  3709.30810     0.00027   
   2562    24.24138  3556.34562  3712.30760     0.00027   
   2563    24.25007  3588.57483  3723.53390     0.00027   
   2564    24.25875  3632.75836  3736.15280     0.00027   
   2565    24.26743  3686.94103  3759.14870     0.00027   
   2566    24.27612  3747.75071  3793.81740     0.00026   
   2567    24.28480  3810.30997  3830.12620     0.00026   
   2568    24.29349  3869.03131  3866.22880     0.00026   
   2569    24.30217  3919.19274  3889.64990     0.00026   
   2570    24.31086  3958.19929  3904.56200     0.00026   
   2571    24.31954  3985.60738  3906.47730     0.00026   
   2572    24.32822  4002.44759  3895.91500     0.00026   
   2573    24.33691  4010.24859  3879.00950     0.00026   
   2574    24.34559  4010.15748  3854.12650     0.00026   
   2575    24.35428  4002.66680  3830.59280     0.00026   
   2576    24.36296  3988.00489  3813.18580     0.00026   
   2577    24.37164  3967.17369  3801.26780     0.00026   
   2578    24.38033  3942.47024  3801.60600     0.00026   
   2579    24.38901  3916.67172  3804.69510     0.00026   
   2580    24.39770  3892.31011  3816.98490     0.00026   
   2581    24.40638  3872.20072  3834.90970     0.00026   
   2582    24.41506  3859.97168  3851.80860     0.00026   
   2583    24.42375  3859.24670  3873.24370     0.00026   
   2584    24.43243  3872.37632  3897.09010     0.00026   
   2585    24.44111  3900.01714  3927.23630     0.00025   
   2586    24.44980  3941.47169  3963.73630     0.00025   
   2587    24.45848  3994.80860  4002.42650     0.00025   
   2588    24.46717  4056.17464  4040.55470     0.00025   
   2589    24.47585  4119.11106  4059.55960     0.00025   
   2590    24.48454  4175.89509  4064.48410     0.00025   
   2591    24.49322  4221.53317  4063.04220     0.00025   
   2592    24.50190  4257.26229  4059.06930     0.00025   
   2593    24.51059  4289.27865  4049.82960     0.00025   
   2594    24.51927  4323.78796  4035.98830     0.00025   
   2595    24.52796  4363.31417  4038.52270     0.00025   
   2596    24.53664  4406.92059  4064.23930     0.00025   
   2597    24.54532  4452.97637  4107.54640     0.00024   
   2598    24.55401  4500.89687  4176.21580     0.00024   
   2599    24.56269  4549.74954  4243.98140     0.00024   
   2600    24.57138  4594.93681  4309.82080     0.00023   
   2601    24.58006  4626.63003  4344.30180     0.00023   
   2602    24.58874  4632.95734  4341.86330     0.00023   
   2603    24.59743  4606.78380  4301.23140     0.00023   
   2604    24.60611  4550.14650  4241.07620     0.00024   
   2605    24.61480  4472.09482  4169.52290     0.00024   
   2606    24.62348  4383.11850  4079.41550     0.00025   
   2607    24.63216  4291.82050  3991.91260     0.00025   
   2608    24.64085  4204.71536  3909.33620     0.00026   
   2609    24.64953  4127.05961  3839.40650     0.00026   
   2610    24.65821  4063.21156  3782.88770     0.00026   
   2611    24.66690  4016.00031  3736.80200     0.00027   
   2612    24.67558  3985.98606  3705.89480     0.00027   
   2613    24.68427  3971.12910  3681.80150     0.00027   
   2614    24.69295  3966.96560  3667.48020     0.00027   
   2615    24.70164  3967.72512  3660.99510     0.00027   
   2616    24.71032  3968.69743  3658.89480     0.00027   
   2617    24.71900  3968.67611  3677.51120     0.00027   
   2618    24.72769  3970.11477  3711.77590     0.00027   
   2619    24.73637  3976.60414  3767.87260     0.00027   
   2620    24.74505  3989.97802  3835.23800     0.00026   
   2621    24.75374  4008.86861  3908.05810     0.00026   
   2622    24.76242  4028.66477  3982.45290     0.00025   
   2623    24.77111  4042.66222  4039.17900     0.00025   
   2624    24.77979  4044.62603  4075.92310     0.00025   
   2625    24.78847  4032.17522  4083.52980     0.00024   
   2626    24.79716  4008.33902  4063.80540     0.00025   
   2627    24.80584  3979.38614  4028.77860     0.00025   
   2628    24.81453  3951.32412  3983.92310     0.00025   
   2629    24.82321  3928.36733  3939.71610     0.00025   
   2630    24.83190  3913.32523  3903.99220     0.00026   
   2631    24.84058  3908.05545  3887.60500     0.00026   
   2632    24.84926  3912.98595  3891.32620     0.00026   
   2633    24.85795  3926.36392  3902.54300     0.00026   
   2634    24.86663  3943.81979  3917.43970     0.00026   
   2635    24.87532  3959.25897  3930.54640     0.00025   
   2636    24.88400  3967.43494  3942.15720     0.00025   
   2637    24.89268  3966.67148  3956.52270     0.00025   
   2638    24.90137  3959.09143  3969.17410     0.00025   
   2639    24.91005  3948.00790  3986.33110     0.00025   
   2640    24.91874  3935.22160  3993.03830     0.00025   
   2641    24.92742  3920.29837  3995.40210     0.00025   
   2642    24.93610  3901.58573  3980.81180     0.00025   
   2643    24.94479  3877.98752  3951.14400     0.00025   
   2644    24.95347  3850.17701  3913.35600     0.00026   
   2645    24.96215  3820.09557  3874.59350     0.00026   
   2646    24.97084  3790.00964  3833.64040     0.00026   
   2647    24.97952  3761.76450  3790.24000     0.00026   
   2648    24.98821  3736.30575  3754.74880     0.00027   
   2649    24.99689  3713.29604  3728.50660     0.00027   
   2650    25.00558  3691.32608  3710.76510     0.00027   
   2651    25.01426  3669.12371  3700.15430     0.00027   
   2652    25.02294  3646.94767  3688.19920     0.00027   
   2653    25.03163  3626.82282  3684.08810     0.00027   
   2654    25.04031  3611.60637  3677.99340     0.00027   
   2655    25.04900  3603.91027  3675.94950     0.00027   
   2656    25.05768  3605.40586  3683.28130     0.00027   
   2657    25.06636  3616.36422  3683.09770     0.00027   
   2658    25.07505  3635.48604  3688.91160     0.00027   
   2659    25.08373  3660.13013  3702.28220     0.00027   
   2660    25.09241  3687.23879  3733.47580     0.00027   
   2661    25.10110  3714.22747  3764.19260     0.00027   
   2662    25.10978  3738.77511  3794.83620     0.00026   
   2663    25.11847  3758.11226  3813.58840     0.00026   
   2664    25.12715  3769.12643  3828.40840     0.00026   
   2665    25.13584  3769.91171  3827.18650     0.00026   
   2666    25.14452  3761.20769  3810.12870     0.00026   
   2667    25.15320  3746.38073  3788.14670     0.00026   
   2668    25.16189  3730.13489  3780.70120     0.00026   
   2669    25.17057  3716.84841  3773.22610     0.00027   
   2670    25.17926  3709.24815  3781.84790     0.00026   
   2671    25.18794  3707.60445  3793.81150     0.00026   
   2672    25.19662  3709.67802  3816.29790     0.00026   
   2673    25.20531  3711.74843  3829.29350     0.00026   
   2674    25.21399  3710.58440  3827.14550     0.00026   
   2675    25.22267  3705.01340  3806.43680     0.00026   
   2676    25.23136  3696.00843  3774.12740     0.00026   
   2677    25.24004  3685.96741  3743.00000     0.00027   
   2678    25.24873  3678.36627  3712.30960     0.00027   
   2679    25.25741  3677.01814  3696.62920     0.00027   
   2680    25.26609  3684.77682  3699.65450     0.00027   
   2681    25.27478  3702.42176  3716.67240     0.00027   
   2682    25.28346  3728.18513  3737.24780     0.00027   
   2683    25.29215  3758.07221  3750.68750     0.00027   
   2684    25.30083  3787.24187  3758.05880     0.00027   
   2685    25.30952  3812.12796  3747.12990     0.00027   
   2686    25.31820  3831.97299  3728.84400     0.00027   
   2687    25.32688  3848.58316  3712.42430     0.00027   
   2688    25.33557  3864.01165  3703.48050     0.00027   
   2689    25.34425  3878.13152  3706.05250     0.00027   
   2690    25.35294  3887.21916  3700.34840     0.00027   
   2691    25.36162  3884.70060  3693.67240     0.00027   
   2692    25.37030  3864.13659  3675.10380     0.00027   
   2693    25.37899  3822.88102  3652.80470     0.00027   
   2694    25.38767  3763.82956  3624.96730     0.00028   
   2695    25.39636  3694.03954  3592.08860     0.00028   
   2696    25.40504  3621.61306  3561.66870     0.00028   
   2697    25.41372  3553.30415  3530.94870     0.00028   
   2698    25.42241  3493.72904  3506.08280     0.00029   
   2699    25.43109  3445.54828  3489.61400     0.00029   
   2700    25.43978  3409.98706  3476.33180     0.00029   
   2701    25.44846  3387.13350  3475.10470     0.00029   
   2702    25.45714  3376.24189  3485.36960     0.00029   
   2703    25.46583  3375.87923  3506.89090     0.00029   
   2704    25.47451  3384.04487  3531.43190     0.00028   
   2705    25.48319  3398.26549  3553.25100     0.00028   
   2706    25.49188  3415.61909  3568.10790     0.00028   
   2707    25.50056  3432.79047  3582.09400     0.00028   
   2708    25.50925  3446.51757  3593.48880     0.00028   
   2709    25.51793  3454.54986  3594.60250     0.00028   
   2710    25.52662  3456.67144  3590.56320     0.00028   
   2711    25.53530  3454.68921  3593.57060     0.00028   
   2712    25.54398  3451.31517  3595.11870     0.00028   
   2713    25.55267  3449.07442  3594.93090     0.00028   
   2714    25.56135  3449.89855  3587.65630     0.00028   
   2715    25.57004  3455.12324  3584.95430     0.00028   
   2716    25.57872  3465.68425  3580.20090     0.00028   
   2717    25.58740  3482.56538  3590.19680     0.00028   
   2718    25.59609  3507.05247  3609.02470     0.00028   
   2719    25.60477  3540.26272  3639.60450     0.00027   
   2720    25.61345  3582.16046  3695.08910     0.00027   
   2721    25.62214  3630.60306  3763.88380     0.00027   
   2722    25.63082  3680.65544  3838.41850     0.00026   
   2723    25.63951  3724.34335  3882.24980     0.00026   
   2724    25.64819  3751.78648  3903.86130     0.00026   
   2725    25.65688  3754.73984  3890.03760     0.00026   
   2726    25.66556  3731.04214  3846.03220     0.00026   
   2727    25.67424  3685.79296  3780.81030     0.00026   
   2728    25.68293  3628.03958  3709.45240     0.00027   
   2729    25.69161  3566.58150  3644.74560     0.00027   
   2730    25.70029  3508.10534  3578.98270     0.00028   
   2731    25.70898  3456.99869  3529.06670     0.00028   
   2732    25.71766  3415.79484  3491.62060     0.00029   
   2733    25.72635  3385.65650  3476.24680     0.00029   
   2734    25.73503  3366.84224  3478.57180     0.00029   
   2735    25.74372  3358.98355  3479.35890     0.00029   
   2736    25.75240  3361.19424  3489.62280     0.00029   
   2737    25.76108  3372.24172  3496.56520     0.00029   
   2738    25.76977  3390.79547  3507.67160     0.00029   
   2739    25.77845  3415.54962  3524.21560     0.00028   
   2740    25.78713  3444.99352  3540.72240     0.00028   
   2741    25.79582  3476.82523  3562.18310     0.00028   
   2742    25.80450  3507.75701  3572.31640     0.00028   
   2743    25.81319  3534.25040  3575.40870     0.00028   
   2744    25.82187  3554.38148  3568.15380     0.00028   
   2745    25.83056  3569.50029  3562.75680     0.00028   
   2746    25.83924  3583.75904  3578.03370     0.00028   
   2747    25.84792  3601.87875  3596.03880     0.00028   
   2748    25.85661  3627.07752  3615.39820     0.00028   
   2749    25.86529  3660.04291  3645.68380     0.00027   
   2750    25.87398  3698.61882  3682.60080     0.00027   
   2751    25.88266  3738.34230  3696.94780     0.00027   
   2752    25.89134  3774.14752  3700.24730     0.00027   
   2753    25.90003  3803.00575  3718.77440     0.00027   
   2754    25.90871  3825.09613  3725.01340     0.00027   
   2755    25.91739  3842.03213  3733.65160     0.00027   
   2756    25.92608  3854.02232  3744.18240     0.00027   
   2757    25.93476  3858.48301  3766.01440     0.00027   
   2758    25.94345  3850.80952  3789.34080     0.00026   
   2759    25.95213  3826.85284  3799.57200     0.00026   
   2760    25.96082  3785.67104  3793.97440     0.00026   
   2761    25.96950  3730.37332  3766.87260     0.00027   
   2762    25.97818  3666.56460  3770.31760     0.00027   
   2763    25.98687  3600.10700  3741.90040     0.00027   
   2764    25.99555  3535.80429  3724.58110     0.00027   
   2765    26.00423  3477.03212  3729.47170     0.00027
[truncated: 5,926 more chars]
